# Supplementary material for: Translation and psychometric evaluation of the German version of the Organisational Readiness for Implementing Change measure (ORIC): a cross-sectional study
Source: PubMed Central journal article supplement — BMJ Open. 2020 Jun 7;10(6):e034380. doi: 10.1136/bmjopen-2019-034380 (PMC7282337; doi:10.1136/bmjopen-2019-034380), 2020-06-07
Supplement: bmjopen-2019-034380.draft_revisions.pdf [file bmjopen-2019-034380.draft_revisions.pdf]

# BMJ Open

BMJ Open is committed to open peer review. As part of this commitment we make the peer review history of every article we publish publicly available.

When an article is published we post the peer reviewers' comments and the authors' responses online. We also post the versions of the paper that were used during peer review. These are the versions that the peer review comments apply to.

The versions of the paper that follow are the versions that were submitted during the peer review process. They are not the versions of record or the final published versions. They should not be cited or distributed as the published version of this manuscript.

BMJ Open is an open access journal and the full, final, typeset and author-corrected version of record of the manuscript is available on our site with no access controls, subscription charges or pay-per-view fees (<http://bmjopen.bmj.com>).

If you have any questions on BMJ Open's open peer review process please email [info.bmjopen@bmj.com](mailto:info.bmjopen@bmj.com)

# BMJ Open

## Translation, adaption and psychometric testing of the German version of the Organizational Readiness for Implementing Change measure (ORIC)

|                               |                                                                                                                                                                                                                                                                                                                                                                                                  |
|-------------------------------|--------------------------------------------------------------------------------------------------------------------------------------------------------------------------------------------------------------------------------------------------------------------------------------------------------------------------------------------------------------------------------------------------|
| Journal:                      | <i>BMJ Open</i>                                                                                                                                                                                                                                                                                                                                                                                  |
| Manuscript ID                 | bmjopen-2019-034380                                                                                                                                                                                                                                                                                                                                                                              |
| Article Type:                 | Original research                                                                                                                                                                                                                                                                                                                                                                                |
| Date Submitted by the Author: | 17-Sep-2019                                                                                                                                                                                                                                                                                                                                                                                      |
| Complete List of Authors:     | Lindig, Anja; University Medical Center Hamburg-Eppendorf, Department of Medical Psychology<br>Hahlweg, Pola; University Medical Center Hamburg-Eppendorf, Department of Medical Psychology<br>Christalle, Eva; University Medical Center Hamburg-Eppendorf, Department of Medical Psychology<br>Scholl, Isabelle; University Medical Center Hamburg-Eppendorf, Department of Medical Psychology |
| Keywords:                     | Organizational readiness for change, Psychometrics, Translation, Implementation, Shared decision-making, Measurement                                                                                                                                                                                                                                                                             |
|                               |                                                                                                                                                                                                                                                                                                                                                                                                  |

SCHOLARONE™  
Manuscripts

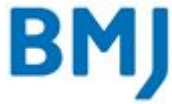

I, the Submitting Author has the right to grant and does grant on behalf of all authors of the Work (as defined in the below author licence), an exclusive licence and/or a non-exclusive licence for contributions from authors who are: i) UK Crown employees; ii) where BMJ has agreed a CC-BY licence shall apply, and/or iii) in accordance with the terms applicable for US Federal Government officers or employees acting as part of their official duties; on a worldwide, perpetual, irrevocable, royalty-free basis to BMJ Publishing Group Ltd ("BMJ") its licensees and where the relevant Journal is co-owned by BMJ to the co-owners of the Journal, to publish the Work in this journal and any other BMJ products and to exploit all rights, as set out in our [licence](#).

The Submitting Author accepts and understands that any supply made under these terms is made by BMJ to the Submitting Author unless you are acting as an employee on behalf of your employer or a postgraduate student of an affiliated institution which is paying any applicable article publishing charge ("APC") for Open Access articles. Where the Submitting Author wishes to make the Work available on an Open Access basis (and intends to pay the relevant APC), the terms of reuse of such Open Access shall be governed by a Creative Commons licence – details of these licences and which [Creative Commons](#) licence will apply to this Work are set out in our licence referred to above.

Other than as permitted in any relevant BMJ Author's Self Archiving Policies, I confirm this Work has not been accepted for publication elsewhere, is not being considered for publication elsewhere and does not duplicate material already published. I confirm all authors consent to publication of this Work and authorise the granting of this licence.

1  
2  
3 1 **Translation, adaption and psychometric testing of the German version of the Organizational**  
4  
5 2 **Readiness for Implementing Change measure (ORIC)**

6  
7 3 Anja Lindig<sup>1</sup>, Pola Hahlweg<sup>1</sup>, Eva Christalle<sup>1</sup>, Isabelle Scholl<sup>1</sup>  
8  
9 4

10  
11 5  
12 6 <sup>1</sup> *Department of Medical Psychology, University Medical Center Hamburg-Eppendorf, Martinistraße 52,*  
13  
14 7 *20246 Hamburg, Germany*  
15  
16 8

17  
18 9 Email addresses: Anja Lindig: [a.lindig@uke.de](mailto:a.lindig@uke.de)  
19  
20 10 Pola Hahlweg: [p.hahlweg@uke.de](mailto:p.hahlweg@uke.de)  
21  
22 11 Eva Christalle: [e.christalle@uke.de](mailto:e.christalle@uke.de)  
23  
24 12 Isabelle Scholl: [i.scholl@uke.de](mailto:i.scholl@uke.de)  
25  
26 13  
27  
28 14  
29  
30 15

31  
32 16 Corresponding author: Anja Lindig  
33  
34 17 University Medical Center Hamburg-Eppendorf  
35  
36 18 Department of Medical Psychology  
37  
38 19 Martinistr. 52  
39  
40 20 20246 Hamburg, Germany  
41  
42 21 Email: [a.lindig@uke.de](mailto:a.lindig@uke.de)  
43  
44 22 Phone: +49-(0)40-7410-56206  
45  
46 23  
47 24  
48

49 25 Word count: 3844  
50  
51 26  
52  
53 27  
54  
55 28  
56  
57 29  
58  
59 30  
60

1  
2  
3 31 **ABSTRACT**

4  
5 32 **Objectives** to translate the measure Organizational Readiness for Implementing Change (ORIC) into  
6  
7 33 German, adapt it for the context of SDM, and assess its psychometric properties.

8  
9 34 **Design** psychometric study based on secondary analysis of baseline data from a SDM implementation  
10  
11 35 study.

12  
13 36 **Setting** Three departments within one academic cancer center in Hamburg, Germany

14  
15 37 **Participants** For comprehensibility assessment of the translated ORIC version we conducted cognitive  
16  
17 38 interviews with n=11 healthcare professionals (HCPs). Afterwards, n=230 HCPs filled out the measure.

18  
19 39 **Primary and Secondary Outcome Measures** The original English version of the ORIC was translated into  
20  
21 40 German using a team translation protocol. Based on comprehensibility assessment via cognitive interviews  
22  
23 41 with HCPs, the translated version was revised. For psychometric evaluation we conducted a secondary  
24  
25 42 analysis of baseline data from a SDM implementation study. We analyzed acceptance (response rate),  
26  
27 43 structural validity (exploratory factor analysis (EFA), confirmatory factor analysis (CFA)), item  
28  
29 44 characteristics (item difficulties, corrected item-total correlations, inter-item correlations), and reliability  
30  
31 45 (Cronbach's  $\alpha$ ).

32  
33 46 **Results** Translation and cognitive testing of the ORIC was successful except for item 10, which showed  
34  
35 47 low comprehensibility. Response rate was > 97%. Structural validity analysis provided a one factorial  
36  
37 48 structure. Item difficulties ranged between 55.98 and 65.32, corrected item-total-correlation ranged  
38  
39 49 between .66 and .74, inter-item correlations ranged between .43 and .72, and Cronbach's  $\alpha$  was .93.

40  
41 50 **Conclusions** The translated and adapted German ORIC is a highly accepted and reliable measure with  
42  
43 51 satisfying psychometric properties and a one factorial structure. To increase comprehensibility and  
44  
45 52 therefore content validity of the measure we suggest to remove item 10. The German ORIC can be used  
46  
47 53 to analyze organizational readiness for change as a precursor for implementation success of various  
48  
49 54 interventions.

50  
51 55  
52  
53 56 **Keywords:**  
54  
55 57 Organizational readiness for change, Psychometrics, Translation, Implementation, Shared decision-  
56  
57 58 making, Measurement  
58  
59 59  
60  
60 60

61

**ARTICLE SUMMARY****Strengths and limitations of this study**

- Appropriate qualitative methods were used to provide a German version of the ORIC which is comprehensible to healthcare professionals (HCPs).
- The sample size was large enough to robustly perform the psychometric analyses on the German version of the ORIC measure.
- Due to the design of the study as a secondary analysis, it was not possible to calculate some psychometric parameters.
- Data was collected at a single academic cancer center. Thus, psychometric properties of the German ORIC need replication in other settings.

**INTRODUCTION**

Implementing interventions in healthcare systems is an important and widely discussed topic [1–3] and often mediated by public policies, market forces, or new technologies [4]. The intention to implement new interventions might be to reduce costs, improve quality, increase efficiency, or patient satisfaction [5]. Nevertheless, implementing change in healthcare organizations can be challenging [6–10].

In the German healthcare system, the implementation of shared decision-making (SDM) has received much attention [11]. SDM can be described as an interactional process on the basis of information exchange. Patients and healthcare professionals (HCPs) are equally and actively involved and jointly responsible for the decision [12–14]. SDM has been supported by health policy [15–17] and research [18–21] during the last decades. However, SDM is currently not widely implemented in the German healthcare system [11,22–24].

When implementing SDM or other interventions in organizations, several barriers on different levels of the organization (individual members of the organization, teams, organizational setting, wider environment) need consideration [1,5–7,10,25–28]. Barriers for implementing SDM in the clinical setting often address both the organizational setting (e.g. lack of resources and lack of management support) and the individual level (e.g. resistance to change or negative attitudes towards SDM) [7,10,11,29–31].

When implementing SDM or other interventions in healthcare systems, the clinical members' perspective on organizational readiness for change is a critical precursor to successfully implement empirical

1  
2  
3 91 knowledge [5,28,32–34]. Armenakis et al. [35] describes organizational readiness for change as the degree  
4  
5 92 to which organizational members are prepared to participate in change processes. This is characterized by  
6  
7 93 the belief that the change is needed and that the organization is capable of changing. Weiner et al. [36]  
8  
9 94 differentiate between change commitment, where organizational members have positive attitudes towards  
10  
11 95 implementing a change, and change efficiency, where they belief in capability to change. If readiness for  
12  
13 96 change is high, organizational members invest more in the change effort and exhibit greater persistence to  
14  
15 97 overcome obstacles and setbacks [36,37].

16 98 To analyze effects on change implementation success and to find suitable strategies to best implement  
17  
18 99 changes, specific measures for assessing organizational readiness for change are needed [5]. However,  
19  
20 100 only a few validated measures exist [5,38–40] and none were available in German. One of those measures  
21  
22 101 is the Organizational Readiness for Implementing Change (ORIC) [39]. The ORIC is the only available  
23  
24 102 measure that is brief, easy to administer and theoretically grounded [36]. It was previously translated into  
25  
26 103 Danish and French [41,42]. The ORIC has been psychometrically tested, revealing good acceptability  
27  
28 104 (response rate > 72%), good reliability (Cronbach's  $\alpha > .80$ ) and good validity with a two factor structure  
29  
30 105 [39,41,42]. Due to the described properties, the ORIC seemed well-suited to measure organizational  
31  
32 106 readiness for implementing SDM in Germany [5,39,43].

33  
34 107 Therefore, the aim of the study was to translate the ORIC into German, adapt it for the context of SDM, and  
35  
36 108 assess its psychometric properties.

37  
38 109

## 39 110 **METHODS**

### 40 111 **Measure**

41  
42 112 The ORIC measures organizational readiness for implementing change. It uses a 5-point Likert scale  
43  
44 113 ranging from 0 „disagree“ to 4 „agree“ [39]. In the original English version, two subscales were described:  
45  
46 114 „change commitment“ (items 1 to 5) and “change efficiency” (items 6 to 10). Sum scores were calculated  
47  
48 115 for both subscales separately with higher scores indicating higher organizational readiness for change. By  
49  
50 116 using the phrases “to implement this change” or “implementing this change”, the original scale does not  
51  
52 117 specify, which change is addressed. The items can be specified to adapt to a specific research question  
53  
54 118 and an introductory description can be added [36,41] . English items are displayed in Table 5.

55  
56 119

### 57 120 **Translation**

1  
2  
3 121 Translation followed the team translation protocol TRAPD (Translation, Review, Adjudication, Pretesting  
4  
5 122 and Documentation) [44]. First, two team members (AL, SZ, cp. list of abbreviations) proficient in German  
6  
7 123 and English independently translated the original ORIC into German. Second, a third bilingual team  
8  
9 124 member (IS) suggested a third version based on the first two translations. Finally, we discussed all versions  
10  
11 125 until reaching consensus on a final version. To find consensus on item 10 we additionally consulted an  
12  
13 126 official translator (MM, cp. list of abbreviations) and an additional team member (PH).

14  
15 127

### 16 128 **Assessment of comprehensibility as part of content validity and subsequent adaption of the scale**

17  
18 129 Content validity is the degree to which the content of the measure and its items is adequately reflecting the  
19  
20 130 measured construct [45]. According to the COSMIN criteria (Consensus-based Standards for the selection  
21  
22 131 of health Measurement Instruments) [46], content validity includes the relevance of the items and scales,  
23  
24 132 their comprehensiveness, and comprehensibility. As this study aimed at testing the translation of an existing  
25  
26 133 measure, we focused on assessment of comprehensibility, which includes that items are appropriately  
27  
28 134 worded and understood by participants as intended.

29  
30 135 To do so, we conducted two rounds of cognitive interviews with a convenience sample of HCPs (nurses,  
31  
32 136 physicians, and psychooncologists), working in a comprehensive cancer center in Germany. Two female  
33  
34 137 psychologists experienced in interviewing (AL, PH) conducted the interviews. A compensation fee of 25  
35  
36 138 Euro was offered to the participants. We developed an interview guide based on recommendations of Willis  
37  
38 139 et al. [47] and conducted interviews until reaching theoretical saturation. Interviews were audio-recorded  
39  
40 140 and transcribed verbatim. After each round of cognitive interviews, we extracted and discussed comments  
41  
42 141 and suggestions from the transcripts (AL, PH, IS) and adapted the German ORIC scale accordingly. As a  
43  
44 142 further step to enhance comprehensibility, we discussed the items in the study team (AL, PH, IS, SZ, cp.  
45  
46 143 list of abbreviations), with a second bilingual researcher in the field (DF, cp. list of abbreviations), the original  
47  
48 144 author (CS, cp. list of abbreviations) as well as French (MR, cp. list of abbreviations) and Norwegian  
49  
50 145 researchers (AH, cp. list of abbreviations) who have been working on translations of the ORIC into their  
51  
52 146 languages.

53 147 We calculated descriptive statistics of demographic characteristics of participants using SPSS (IBM SPSS  
54  
55 148 Statistics, Version 23).

56  
57 149

### 58 150 **Psychometric evaluation**



1  
2  
3 151 **Data collection.** The psychometric evaluation of the ORIC measure is a secondary analysis of data  
4  
5 152 gathered in a SDM implementation study [48]. Data from baseline assessment of the SDM implementation  
6  
7 153 study were included. The ORIC was part of a three-page questionnaire measuring HCPs' attitudes  
8  
9 154 regarding SDM and its implementation. Besides the ORIC, it contained the Control Preference Scale [49]  
10  
11 155 and the IcanSDM [50], demographic questions (e.g. gender, age, profession, work experience) as well as  
12  
13 156 several self-generated questions [51]. Results of these additional measures will be published as part of the  
14  
15 157 primary evaluation of the SDM implementation study.

16  
17 158 Participants were physicians and nurses, who worked at one of three departments within the University  
18  
19 159 Cancer Center Hamburg at the University Medical Center Hamburg-Eppendorf. Eligible HPCs were  
20  
21 160 identified through employee lists provided by department managers. The measure was handed out either  
22  
23 161 (1) by a member of the study team (e.g. during a regular physician meeting), (2) by the supervising nurses,  
24  
25 162 or (3) via employees' mailboxes. Participants returned the questionnaire personally to a study team member  
26  
27 163 or by mail.

28 164 Data were entered into SPSS (IBM SPSS Statistics, Version 23) including blinded double entry of 20% of  
29  
30 165 the data for quality control.

31  
32 166 **Data Analysis.** Descriptive statistics were calculated for demographic characteristics. Cases were  
33  
34 167 excluded if more than 30% of the ORIC items were missing. For all other cases, missing data were replaced  
35  
36 168 with item means. We evaluated the response rate and therefore the acceptance of the measure by  
37  
38 169 calculating frequencies of missing data per item. For analysis of acceptance, we also included the cases  
39  
40 170 with more than 30% of ORIC items missing.

41  
42 171 We a priori hypothesized to replicate the two-dimensional structure of the original English ORIC version.  
43  
44 172 Two factors "change commitment" (item 1 to 5) and "change efficiency" (item 6 to 10) were postulated.  
45  
46 173 Kaiser-Meyer-Olkin (KMO) measure of sampling adequacy and the Bartlett's test of sphericity were  
47  
48 174 performed to test prerequisites for factor analysis [52,53]. A confirmatory factor analysis (CFA) with  
49  
50 175 Maximum Likelihood Estimates and two factors was applied for the whole data set as a first step. Because  
51  
52 176 the two-factor model could not be confirmed, the data set was randomized and split into two subsets (each  
53  
54 177 n=115). An exploratory factor analysis (EFA) with orthogonal varimax rotation and extraction of components  
55  
56 178 with eigenvalues > 1 was applied for the first subset. A CFA was again calculated for the second subset. A  
57  
58 179 range of global goodness of fit indices were used to assess the degree to which observed data were  
59  
60 180 accounted for by the proposed models: discrepancy chi-squared statistic ( $\chi^2$ ), degree of freedom (df),

181 normed chi-squared statistic ( $\chi^2/df$ ), comparative fit index (CFI), Tucker-Lewis Index (TLI), root mean  
 182 square error of approximation (RMSEA) as well as Akaike Information Criterion (AIC) and Parsimonious  
 183 Normed Fit Index (PNFI) for analysing model complexity. Established rules to estimate the model fit were  
 184 used [54–57].

185 Item analysis was performed for the one-factor model. It included calculation of item means and standard  
 186 deviation as well as observation of floor and ceiling effects [58], calculation of corrected item-total  
 187 correlations [52,59], inter-item correlations [52,59], and item difficulties [53]. Internal consistency of the  
 188 scale was assessed by Cronbach's alpha coefficient ( $\alpha$ ) [53,59,60]. For a detailed overview on performed  
 189 data analyses see Table 1.

190 Because of low content validity of item 10, the use of item 10 for the German ORIC needs to be evaluated.  
 191 Therefore, we also conducted psychometric analysis (EFA with varimax rotation and extraction of  
 192 components with eigenvalues  $> 1$ , corrected item-total correlations, Cronbach's  $\alpha$ , and goodness of fit  
 193 indexes) for the 9-item version of the ORIC (see Supplementary File 1).

194 Analysis of demographic data, analysis of response rate, item analysis and EFA were performed using  
 195 SPSS (IBM SPSS Statistics, Version 23). CFA and calculation of model fit indices were performed using  
 196 Amos (IBM SPSS Amos 22.0.0).

198 Table 1: Psychometric analyses conducted.

| Psychometric measure                                                                    | Criteria                                                                                                                                                                                                                                                              |
|-----------------------------------------------------------------------------------------|-----------------------------------------------------------------------------------------------------------------------------------------------------------------------------------------------------------------------------------------------------------------------|
| Kaiser-Meyer-Olkin (KMO) measure of sampling adequacy and Bartlett's test of sphericity | These tests ensure that correlations between variables can be accounted for by a smaller set of factors [53]. KMO value should be higher than .05 and Bartlett's test value should be less than .05 to fulfil the criteria for calculating a factor analysis [53,54]. |
| Analysis of frequencies for item response distributions                                 | Floor and ceiling effects were assumed present if more than 15% of participants choose the lowest or highest possible score [59].                                                                                                                                     |
| Corrected item-total correlations                                                       | If items correlate with the total score of above .30, they measure the same underlying concept. Items with lower correlations should be removed because they do not add exploratory power to the measure [53,60].                                                     |
| Item difficulties                                                                       | Item difficulties are calculated by dividing item means by the maximal value of the answer range (0-4) and multiplying it with 100. Item difficulty should be near to 50%, and items should not differ much in their difficulty level [54].                           |

|                                                     |                                                                                                                                                                                                                                                   |
|-----------------------------------------------------|---------------------------------------------------------------------------------------------------------------------------------------------------------------------------------------------------------------------------------------------------|
| Inter-item correlations                             | Inter-item correlations ensure association between items. High inter-item correlations of above .80 indicate that items ask the same questions and might be redundant [53,60].                                                                    |
| Cronbach's $\alpha$                                 | Cronbach's $\alpha$ is a measure for reliability and internal consistency. A value of at least .70 is acceptable and higher coefficients indicate a more stable measure [53,54,61].                                                               |
| Normed chi-squared statistic (Chi <sup>2</sup> /df) | Chi <sup>2</sup> /df is an indicator for model fit, dependent on sample size and should be as small as possible. A ratio between 2 and 3 indicate a good data fit [55].                                                                           |
| Comparative fit indexes (CFI)                       | CFIs is an indicator for model fit. It ranges from 0 to 1 and higher values indicate better fit. Values above .95 indicate a good model fit [58,62].                                                                                              |
| Tucker-Lewis Index (TLI)                            | TLI is an indicator for model fit. It corrects for complexity of the model and is sensitive to small sample sizes. Values above .95 indicate good fit [56].                                                                                       |
| Root mean square error of approximation (RMSEA)     | RMSEA is an absolut index which describes closeness to fit. Values below .05 indicate a good fit, values between .05 and .08 indicate an adequate fit, values between .08 and 1 indicate a moderate fit and values above 1 are unacceptable [63]. |
| Akaike Information Criterion (AIC)                  | AIC is a parsimony model fit index. It can be used to compare fit of competing models with smaller values indicating better fit [55,58].                                                                                                          |
| Parsimonious Normed Fit Index (PNFI)                | PNFI is a parsimony model fit index. It ranges between 0 and 1 and higher values indicate a more parsimonious fit [55]. No threshold levels are recommended and it has to be analysed in combination with other goodness of fit indices [58].     |

199

## 200 Patient and public involvement

201 The measure ORIC preliminary addresses HCPs, therefore physicians, nurses and psychooncologists were  
 202 involved in the adaption of the measure by taking part in cognitive interviews. Our cooperation partner  
 203 as well as stakeholders of the three participating clinics (physicians and nurses) supported the recruitment  
 204 process by handing over surveys to their colleagues or supporting us to reach eligible participants. Patients  
 205 were not involved in this study.

206

## 207 RESULTS

### 208 Translation

209 We adapted the ORIC to fit our research question of SDM implementation. Therefore "to implement this  
 210 change" / "implementing this change" was rephrased into "to implement shared decision-making" /  
 211 "implementing shared decision-making". Additionally we added an introductory description. Within the first

1  
2  
3 212 round of discussion, we reached consensus for items 1 to 9. We struggled to translate the phrase “manage  
4  
5 213 the politics” in item 10 into German. Therefore, we discussed item 10 with additional colleagues (cp.  
6  
7 214 methods section) until consensus was found.  
8  
9 215

### 216 **Assessment of comprehensibility as part of content validity and subsequent adaption of the scale**

12 217 To test the German ORIC for comprehensibility, cognitive interviews with N=11 participants (nurses,  
13  
14 218 physicians, and psychooncologists) were conducted. Cognitive interviews lasted about one hour. For  
15  
16 219 demographic data of participants see Table A in Supplementary File 2.

18 220 After two rounds of cognitive interviews and slight modifications of single words or phrases, items 1 to 9  
19  
20 221 were well understood by all participants. Item 10 could not be translated successfully. After the first round  
21  
22 222 of cognitive interviews with n=7, we adapted item 10 after discussions within the study team (AL, PH, IS)  
23  
24 223 as well as with other international researchers working with the ORIC (CS, AH, MR, cp. list of abbreviations).

26 224 A second round of cognitive interviews with n=4 showed that comprehension of the German translation of  
27  
28 225 the phrase “manage the politics” did not picture the correct English meaning. We therefore involved another  
29  
30 226 bilingual SDM implementation researcher (DF, cp. list of abbreviations). We found consensus for an  
31  
32 227 adapted version of item 10 but it was still not satisfying from the study team and experts view. Item 10 was  
33  
34 228 found to have low comprehensibility as part of content validity according to COSMIN criteria [46]. The final  
35  
36 229 German ORIC measure, used in this study, is presented in Supplementary File 3.

37 230 During cognitive interviews some nurses reported that they had not heard about the term “shared decision-  
38  
39 231 making” (German: “Partizipative Entscheidungsfindung”) prior to participation. Thus, we provided a  
40  
41 232 definition of SDM in the introduction part of the questionnaire within the SDM implementation study.  
42  
43 233

### 234 **Psychometric evaluation**

47 235 **Sample characteristics.** Data of 235 HCPs were available for this secondary analysis. Five cases were  
48  
49 236 excluded (except for assessment of response rate), because all items of the ORIC were missing. For all  
50  
51 237 other cases <30% of the items were missing. Thus, data of 230 HCPs could be included into analysis.

52 238 Table 2 provides an overview of demographic characteristics of participants. Most of the 230 HCPs were  
53  
54 239 between 31 and 40 years old (36.96%), female (70.43%), worked as a nurse (56.96%), and had a work  
55  
56 240 experience of < 5 years (43.91%).  
57  
58 241  
59  
60

242 Table 2: Demographic characteristics of participants (n=230).

|                               |                                                       | N   | %     |
|-------------------------------|-------------------------------------------------------|-----|-------|
| Age                           | < 30 years                                            | 72  | 31.3  |
|                               | 31-40 years                                           | 85  | 36.96 |
|                               | 41-50 years                                           | 42  | 18.26 |
|                               | > 50 years                                            | 26  | 11.30 |
|                               | Missings                                              | 5   | 2.17  |
| Gender                        | Female                                                | 162 | 70.43 |
|                               | Male                                                  | 59  | 25.65 |
|                               | Different gender or preferred not to answer questions | 5   | 2.1   |
|                               | Missings                                              | 4   | 1.74  |
| Profession                    | Nurse                                                 | 131 | 56.96 |
|                               | Junior physician                                      | 69  | 30.00 |
|                               | Senior physician                                      | 27  | 11.74 |
|                               | Missings                                              | 3   | 1.30  |
| Work experience in healthcare | < 5 years                                             | 101 | 43.91 |
|                               | 5-10 years                                            | 48  | 20.87 |
|                               | 11-20 years                                           | 46  | 20.00 |
|                               | > 20 years                                            | 28  | 12.17 |
|                               | Missings                                              | 7   | 3.04  |

243  
244  
245 **Structural validity.** KMO measure was .933 and Barlett's test of sphericity yielded  $X^2 = 1485.11$ ,  $p < .001$ ,  
246 indicating that a factor analysis of the data was appropriate. CFA for the hypothesised two-factor model  
247 showed a high correlation of .87 between the two components (see Supplementary File 4). Therefore, we  
248 postulated a one factorial structure and conducted a post-hoc EFA. Since the main component explains  
249 67% of the variance, a one-factor model was assumed (see Table 3). The factor loading for the first  
250 component is shown in Table B of Supplementary File 2.

252 Table 3: Results of EFA.

|              | Eigenvalue |               |              |
|--------------|------------|---------------|--------------|
|              | Total      | % of variance | Cumulative % |
| Component 1  | 6.72       | 67.23         | 67.23        |
| Component 2  | 0.83       | 8.30          | 75.53        |
| Component 3  | 0.47       | 4.75          | 80.28        |
| Component 4  | 0.41       | 4.08          | 84.36        |
| Component 5  | 0.39       | 3.91          | 88.28        |
| Component 6  | 0.32       | 3.24          | 91.52        |
| Component 7  | 0.27       | 2.74          | 94.26        |
| Component 8  | 0.23       | 2.34          | 96.60        |
| Component 9  | 0.17       | 1.74          | 98.35        |
| Component 10 | 0.16       | 1.65          | 100.00       |

253 Notes: Eigenvalues of the ten components of the German ORIC, percentage of explained variance, and cumulative percentage of explained variance of each component. For EFA, half of the data set (n=115) was used.

254  
 255 A CFA was performed again with the one-factor model to analyse its fit indices. Indices of the two-factor  
 256 model and the one-factor model are compared in Table 4.

257

258 Table 4: Fit indices of two calculated models for factor analysis of the German ORIC.

|                  | Chi <sup>2</sup> <sup>1</sup> | df <sup>2</sup> | Chi <sup>2</sup> /df <sup>3</sup> | CFI <sup>4</sup> | TLI <sup>5</sup> | RMSEA <sup>6</sup> | AIC <sup>7</sup> | PNFI <sup>8</sup> |
|------------------|-------------------------------|-----------------|-----------------------------------|------------------|------------------|--------------------|------------------|-------------------|
| Two-factor model | 81.71*                        | 34              | 2.40                              | .968             | .947             | .078               | 143.71           | .585              |
| One-factor model | 77.19*                        | 35              | 2.20                              | .928             | .907             | .103               | 117.19           | .682              |

Notes: Two-factor model was calculated for the whole data set (n=230): factor 1 includes item 1 to 5, factor 2 includes item 6 to 10; One-factor model was calculated for half of the data set (n=115): includes items 1 to 10.

<sup>1</sup> discrepancy chi-squared statistic, <sup>2</sup> degrees of freedom, <sup>3</sup> normed chi-squared statistic, <sup>4</sup> comparative fit indexes, <sup>5</sup> Tucker-Lewis Index, <sup>6</sup> root mean square error of approximation, <sup>7</sup> Akaike Information Criterion, <sup>8</sup> Parsimonious Normed Fit Index (PNFI). \*  $p = .000$

259  
 260  
 261 Results of factor analysis for the 9-item version of the ORIC (without item 10) were similar. For the 9-item  
 262 version also, a one-factor model was assumed by exploratory factor analysis. Goodness of fit indices of the  
 263 one-factor model of the 9-item ORIC version showed similar values compared to the 10-item ORIC version  
 264 (see Supplementary File 1).

265  
 266 **Analysis of the ORIC items and reliability.** Table 5 shows response distribution, means, standard  
 267 deviations, acceptance, corrected item-total correlation and item difficulty of the ten items. Means range  
 268 between 2.24 (item 9) and 2.61 (item 5). Most people responded in the middle of the scale with a slight shift  
 269 to more agreement. Missing values for items 1 to 9 ranged from four to six. For item 10, nine missing values  
 270 were found. Taking all items into account, more than 97% of the measure were answered. Corrected item-  
 271 total correlations ranged from .66 (item 9) to .74 (item 3), and item difficulties ranged from 55.98 (item 9) to  
 272 65.32 (item 5). Inter-item correlations range from .434 (item2/item9) to .723 (item3/item 5) (see Table C of  
 273 Supplementary File 2). Internal consistency yielded a Cronbach's  $\alpha$  of .93.

274 Results of reliability and item analysis of the 9-item ORIC version were similar to results for the 10-item  
 275 version (see Supplementary File 2).

276

277

278 Table 5: Response distribution, means, standard deviation, acceptance, discrimination and item difficulty of the German ORIC.

| Items                                                                                                                              | Disagree<br>N (%) | Somewhat<br>Disagree<br>N (%) | Neither<br>Agree nor<br>Disagree<br>N (%) | Somewhat<br>Agree<br>N (%) | Agree<br>N (%) | Mean (SD)   | Acceptance<br>(Response<br>in %)* | Item<br>discrimination<br>(corrected<br>item-total<br>correlation) | Item<br>difficulty |
|------------------------------------------------------------------------------------------------------------------------------------|-------------------|-------------------------------|-------------------------------------------|----------------------------|----------------|-------------|-----------------------------------|--------------------------------------------------------------------|--------------------|
| 1 People who work here are committed to implementing shared decision-making.                                                       | 1 (0.4)           | 22 (9.6)                      | 109 (47.0)                                | 73 (30.9)                  | 25 (10.9)      | 2.42 (.826) | 97.43                             | .744                                                               | 60.58              |
| 2 People who work here will do whatever it takes to implement shared decision-making.                                              | 4 (1.7)           | 37 (16.1)                     | 103 (44.8)                                | 68 (29.6)                  | 18 (7.4)       | 2.25 (.878) | 98.29                             | .689                                                               | 56.36              |
| 3 People who work here want to implement shared decision-making.                                                                   | 0 (0.0)           | 15 (6.5)                      | 107 (46.5)                                | 84 (35.7)                  | 24 (10.4)      | 2.50 (.768) | 97.43                             | .774                                                               | 62.61              |
| 4 People who work here are determined to implement shared decision-making.                                                         | 2 (9.0)           | 38 (16.5)                     | 107 (46.5)                                | 67 (29.1)                  | 16 (7.0)       | 2.25 (.843) | 98.29                             | .758                                                               | 56.19              |
| 5 People who work here are motivated to implement shared decision-making.                                                          | 1 (0.4)           | 16 (7.0)                      | 85 (37.0)                                 | 97 (42.2)                  | 31 (13.5)      | 2.61 (.821) | 98.29                             | .764                                                               | 65.32              |
| 6 People who work here feel confident that they can handle the challenges that might arise in implementing shared decision-making. | 2 (0.9)           | 20 (8.7)                      | 93 (40.4)                                 | 93 (40.4)                  | 22 (9.6)       | 2.49 (.819) | 98.29                             | .760                                                               | 62.28              |
| 7 People who work here feel confident that they can keep track of progress in implementing shared decision-making.                 | 1 (0.4)           | 26 (11.3)                     | 93 (40.4)                                 | 92 (40.0)                  | 18 (7.8)       | 2.43 (.811) | 98.29                             | .725                                                               | 60.87              |
| 8 People who work here feel confident that they can coordinate tasks so that implementation goes smoothly.                         | 5 (2.2)           | 24 (10.4)                     | 107 (46.5)                                | 78 (33.5)                  | 16 (6.5)       | 2.32 (.833) | 99.56                             | .697                                                               | 58.13              |
| 9 People who work here feel confident that the organization can support people as they adjust to shared decision-making.           | 6 (2.6)           | 43 (18.7)                     | 89 (38.7)                                 | 74 (32.2)                  | 18 (7.8)       | 2.24 (.934) | 97.86                             | .665                                                               | 55.98              |
| 10 People who work here feel confident that they can manage the politics of implementing shared decision-making.                   | 3 (1.3)           | 24 (10.04)                    | 122 (50.9)                                | 65 (28.3)                  | 16 (7.0)       | 2.29 (.796) | 96.15                             | .714                                                               | 57.44              |

Notes: Items could be answered on a 5-step Likert scale rating from 0 „disagree” to 4 „agree”. SD = standard deviation. \* For calculation of response rate, four additional cases were included because these participants only skipped the ORIC but filled out the rest of the questionnaire.

279

## 280 **DISCUSSION**

281 The original English ORIC measure is a brief measure with good psychometric properties [39], which were  
282 confirmed in Danish [41] and French [42] validation studies. We chose the ORIC to assess organizational  
283 readiness for implementing SDM in a implementation study in a hospital setting in Germany [48]. As a first  
284 step, the study at hand aimed to translate the ORIC into German, adapt it for the context of SDM, and  
285 assess its psychometric properties.

### 287 **Assessment of comprehensibility as part of content validity**

288 Items 1 to 9 could be translated and adapted successfully. Feedback by participants, members of the study  
289 team, and external experts as well as response rates suggest that item 10 could not be translated  
290 satisfyingly and comprehensibility of this item is low [46]. A reason might be the translation of the phrase  
291 “manage the politics” into “Machenschaften”. We assume that the term “manage the politics” has a strong  
292 cultural connotation because no equivalent phrase in German language exists. The German phrase  
293 “Machenschaften” might be confusing for some participants and they decided to rather skip the item. Ruest  
294 et al. [42], who translated the English ORIC into French, also identified several differences in cultural  
295 concepts during their adaptation process but could translate all items successfully. They concluded that  
296 limitations in linguistic validation could decrease comparability of psychometric results of the translated  
297 measure. In our sample, item 10 comes along with similar and inconspicuous item characteristics compared  
298 to other items. When repeating factor and item analyses for the 9-item ORIC version including only item 1  
299 to 9, very similar results were observed compared to the 10-item version. Thus, we would recommend to  
300 use the 9-item ORIC version to increase comprehensibility and therefore content validity of the scale.

### 302 **Structural validity**

303 We could not confirm the two-factor structure of the English and the translated Danish and French versions  
304 of ORIC [39,41,42]. Results of EFA indicated a one-factor structure while the two-factor model showed  
305 better fit indices. Both models have acceptable values for  $\chi^2/df$  [54] and CFI [57,61] but only the two-  
306 factor model has acceptable values for TLI [55] and RMSEA [62]. When involving parsimony of the models  
307 by calculating AIC and PNFI, the one-factor model fits better to the data [54,57]. Therefore, the more  
308 parsimonious one-factor model should be preferred.



### 310 **Analysis of ORIC items and reliability**

311 Missing value rates for single items and the overall measure were quite low. Therefore, the German version  
312 of the ORIC was found to be a well-accepted measure. Observations of floor and ceiling effects, corrected  
313 item-total correlations, item difficulties, and inter-item correlations met the criteria for good quality of  
314 measures [52,53,58–60]. Cronbach's  $\alpha$  ( $\alpha=.93$ ) suggest excellent reliability [52,53,60].  
315 According to Streiner and Norman [53] a Cronbach's  $\alpha$  above .90 might also indicate item redundancy. On  
316 the other hand, inter-item correlations of the German ORIC are in an acceptable range and all items seem  
317 to add additional information to the underlying concept [52,59]. In implementation research there is a need  
318 for preferably brief measures, which can be applied in diverse settings with high work-load. Thus, future  
319 research could investigate the possibility to further reduce the number of items.

320

### 321 **Strength and Limitations**

322 This study has some limitations. First, several psychometric parameters are not analysable because of the  
323 secondary analysis. Due to the design of the study, it was not possible to calculate e.g. convergent or  
324 divergent validity yet. Second, we applied the ORIC only in three departments of one University Medical  
325 Center in Germany. Further validation in different organizational settings is needed to ensure  
326 generalizability.

327 A major strength of this study is that we provided the first measure to assess organizational readiness for  
328 change in German language for use in implementation studies. Furthermore, we assessed the ORIC in a  
329 large sample including physicians and nurses.

330

### 331 **CONCLUSION**

332 Organizational readiness is a crucial indicator to successfully implement change and a possible barrier if  
333 missing. For implementation studies, it is essential to measure organizational readiness with valid and  
334 reliable measures. We provide the first German measure for organizational readiness for implementing  
335 change. The German ORIC is a brief measure and highly accepted. We found satisfying psychometric  
336 properties in a German hospital setting. To increase content validity of the measure, we suggest to leave  
337 out item 10. As the ORIC targets the attitude of organizational members, it can detect reduced or missing  
338 readiness for implementing a change on the individuals' level. Therefore, the German ORIC can be used

1  
2  
3 339 to analyse organizational readiness as a possible barrier for implementing various interventions in the  
4  
5 340 healthcare setting.  
6

7 341

8  
9 342 **LIST OF ABBREVIATIONS**

10 343 AH: Anne Haugstvedt

11  
12 344 AIC: Akaike Information Criterion

13  
14 345 AL: Anja Lindig

15  
16 346 AMOS: Analysis of Moment Structure, Statistical Package for the Social Sciences, International Business  
17  
18 347 Machines Corporation

19  
20 348  $\chi^2$ : Discrepancy chi-squared statistic

21  
22 349  $\chi^2/df$ : Normed chi-squared statistic

23  
24 350 CFI: Confirmatory fit index

25  
26 351 CS: Christopher M. Shea

27  
28 352 Df: Degree of freedom

29  
30 353 DF: Dominick Frosch

31  
32 354 EC: Eva Christalle

33  
34 355 HCP: Healthcare professional

35  
36 356 IS: Isabelle Scholl

37  
38 357 KMO: Kaiser-Meyer-Olkin criterion

39  
40 358 MM: Marcel Machalski

41  
42 359 MR: Mélanie Ruest

43  
44 360 ORIC: Organizational Readiness for Implementing Change

45  
46 361 PH: Pola Hahlweg

47  
48 362 PNFI: Parsimonious Normed Fit Index

49  
50 363 RMSEA: Root mean square error of approximation

51  
52 364 SDM: Shared decision-making

53  
54 365 SPSS: Statistical Package for the Social Sciences, International Business Machines Corporation

55  
56 366 SZ: Stefan Zeh

57  
58 367 TLI: Tucker-Lewis Index

59  
60 368 TRAPD: Translation, Review, Adjudication, Pretesting, Documentation

369

**370 DECLARATIONS****371 Ethics approval and consent to participate**

372 The study was approved by the Ethics Committee of the Medical Association Hamburg (Germany, study  
373 ID PV5368). The study was carried out in accordance to the latest version of the Helsinki Declaration of the  
374 World Medical Association. Principles of good clinical practice were respected. Data protection  
375 requirements were met. Study participation was voluntary. A waiver of consent for HCPs was obtained from  
376 the Ethics Committee, as proposed by current statements on ethical designs of implementation research  
377 [63]. HCPs were able to decline participation in the study.

378

**379 Funding**

380 This study is funded by the German Research Foundation (Deutsche Forschungsgemeinschaft, grant  
381 number 232160533).

382

**383 Competing interests**

384 PH gave one scientific presentation on shared decision-making during a lunch symposium, for which she  
385 received compensation and travel compensation from GlaxoSmithKline GmbH in 2018. AL, EC and IS  
386 declared to not have any competing interests.

387

**388 Author contributions**

389 AL, PH and IS made substantial contributions to the design and preparation of the study. AL and PH  
390 collected the data. AL conducted the analysis in collaboration with EC. All authors contributed to the  
391 interpretation of results. AL drafted the manuscript and PH, IS and EC were involved in critically revising  
392 the manuscript for important intellectual content. All authors gave final approval of the version to be  
393 published.

394

**395 Checklist for reporting statement**

396 To report the results of this validation study, we used the Authors Guidelines for Reporting Scale  
397 Development and Validation Results by Cabrera-Nguyen [64]. The Checklist can be found in  
398 Supplementary File 5.

1  
2  
3 3994  
5 400 **Patient consent form**6  
7 401 Not applicable8  
9 40210  
11 403 **Data sharing statement**12  
13 404 The dataset collected and analyzed during this study is available from the corresponding author on  
14 405 reasonable request.15  
16 40617  
18 407 **Acknowledgements**19  
20 408 We thank our student assistants Anastasia Izotova, Sophia Schulte and Nicolai Pergande for their help  
21 409 preparing the study and the analysis. We thank Stefan Zeh for his part the team translation process. We  
22 410 thank Dominick Frosch, Anne Haugstvedt, Marcel Machalski, Mélanie Ruest and Christopher M. Shea for  
23 411 helpful comments and suggestions in the translation and adaption process of item 10. We also would like  
24 412 to thank Christopher M. Shea for giving the opportunity to translate the ORIC into German and to use it in  
25 413 our implementation study.26  
27 41428  
29 415 **Supplementary Files**30  
31 416 Supplementary File 1: Results of psychometric analysis of the 9-item German ORIC version: Factor  
32 417 analysis, corrected item-total correlations, Cronbach's  $\alpha$ 33  
34 418 Supplementary File 2: Additional tables for psychometric evaluation of the 10-item ORIC version35  
36 419 Supplementary File 3: Organizational Readiness for Implementing Change (ORIC) – German version37  
38 420 Supplementary File 4: Confirmatory factor analysis model of the 10-item German ORIC39  
40 421 Supplementary File 5: Reporting Checklist: Authors Guidelines for Reporting Scale Development and  
41 422 Validation Results by Cabrera-Nguyen [64]42  
43 42344  
45 424 **REFERENCES**46  
47 425 1 Øvretveit J, Andreen-Sachs M, Carlsson J, et al. Implementing organisation and management  
48 426 innovations in Swedish healthcare. *J Health Organ Manag* 2012;26:237–57.49  
50 427 2 Montgomery A, Doulougeri K, Panagopoulou E. Implementing action research in hospital settings: a  
51 428 systematic review. *J Health Organ Manag* 2015;29:729–49.52  
53  
54  
55  
56  
57  
58  
59  
60

- 1  
2  
3 429 3 Rye CB, Kimberly JR. The Adoption of Innovations by Provider Organizations in Health Care. *Med Care*  
4  
5 430 *Res Rev* 2007;64:235–78.  
6  
7 431 4 Bazzoli GJ, Dynan L, Burns LR, et al. Two Decades of Organizational Change in Health Care: What  
8  
9 432 Have we Learned? *Med Care Res Rev* 2004;61:247–331.  
10  
11 433 5 Weiner BJ, Amick H, Lee S-YD. Conceptualization and measurement of organizational readiness for  
12  
13 434 change: a review of the literature in health services research and other fields. *Med Care Res Rev*  
14  
15 435 2008;65:379–436.  
16  
17 436 6 Batras D, Duff C, Smith BJ. Organizational change theory: Implications for health promotion practice.  
18  
19 437 *Health Promot* 2016:231–41.  
20  
21 438 7 Yazdani A, Wells R. Barriers for implementation of successful change to prevent musculoskeletal  
22  
23 439 disorders and how to systematically address them. *Appl Ergon.* 2018;73:122–40.  
24  
25 440 8 Schelvis RMC, Wiezer NM, Blatter BM, et al. Evaluating the implementation process of a participatory  
26  
27 441 organizational level occupational health intervention in schools. *BMC Public Health* 2016;16:1212.  
28  
29 442 9 Scott DAH, Grant SM. A meta-ethnography of the facilitators and barriers to successful implementation  
30  
31 443 of patient complaints processes in health-care settings. *Heal Expect* 2018;21:508–17.  
32  
33 444 10 Williams B, Perillo S, Brown T. What are the factors of organisational culture in health care settings  
34  
35 445 that act as barriers to the implementation of evidence-based practice? A scoping review. *Nurse Educ*  
36  
37 446 *Today* 2015;35:e34–41.  
38  
39 447 11 Härter M, Dirmaier J, Scholl I, et al. The long way of implementing patient-centered care and shared  
40  
41 448 decision making in Germany. *Z Evid Fortbild Qual Gesundheitsw* 2017;123–124:46–51. A  
42  
43 449 12 Bieber C, Loh A, Ringel N, et al. Patientenbeteiligung bei medizinischen Entscheidungen. Manual zur  
44  
45 450 partizipativen Entscheidungsfindung (Shared Decision-Making). Freiburg: Universitätsklinikum Freiburg  
46  
47 451 2007.  
48  
49 452 13 Härter M, Buchholz A, Nicolai J, et al. Shared decision making and the use of decision aids. *Dtsch*  
50  
51 453 *Arztebl Int* 2015;112:672–9.  
52  
53 454 14 Salzburg Global Seminar. Salzburg statment on shared decision making. *BMJ* 2011;342:1745.  
54  
55 455 15 Härter M, Müller H, Dirmaier J, et al. Patient participation and shared decision making in Germany -  
56  
57 456 History, agents and current transfer to practice. *Z Evid Fortbild Qual Gesundheitsw* 2011;105:263–70.  
58  
59 457 16 Härter M, Moumjid N, Cornuz J, et al. Shared decision making in 2017: International accomplishments  
60  
458 in policy, research and implementation. *Z Evid Fortbild Qual Gesundheitsw* 2017;123–124:1–5.

- 1  
2  
3 459 17 Härter M, van der Weijden T, Elwyn G. Policy and practice developments in the implementation of  
4  
5 460 shared decision making: An international perspective. *Z Evid Fortbild Qual Gesundheitswes* 2011;105:229–  
6  
7 461 33.
- 8  
9 462 18 Fujimori M, Uchitomi Y. Preferences of Cancer Patients Regarding Communication of Bad News: A  
10  
11 463 Systematic Literature Review. *Jpn J Clin Oncol* 2009;39:201–16.
- 12  
13 464 19 Ernst J, Braehler E, Weissflog G. [Patient involvement in medical decision making--an overview on  
14  
15 465 patient preferences and impacting factors]. *Gesundheitswesen* 2014;76:187–92.
- 16  
17 466 20 Chewning B, Bylund CL, Shah B, et al. Patient preferences for shared decisions: A systematic review.  
18  
19 467 *Patient Educ Couns* 2012;86:9–18.
- 20  
21 468 21 Brom L, Hopmans W, Pasman HR, et al. Congruence between patients' preferred and perceived  
22  
23 469 participation in medical decision-making: A review of the literature. *BMC Med Inform Decis Mak*  
24  
25 470 2014;14:25.
- 26  
27 471 22 Légaré F, Stacey D, Turcotte S, et al. Interventions for improving the adoption of shared decision  
28  
29 472 making by healthcare professionals. *Cochrane Database Syst Rev* 2014;9:CD006732.
- 30  
31 473 23 Légaré F, Witteman HO. Shared decision making: Examining key elements and barriers to adoption  
32  
33 474 into routine clinical practice. *Health Aff* 2013;32:276–84.
- 34  
35 475 24 Frosch D, Tietbohl C, Scholl I. Overcoming implementation challenges to advance shared-decision  
36  
37 476 making in routine practice. In: Elwyn G, Thompson R, Edwards A, editors. *Shar Decis Mak Heal Care*  
38  
39 477 *Achiev Evidence-Based Patient Choice*, 3rd Ed. Oxford: Oxford University Press 2016.
- 40  
41 478 25 Grol R, Wensing M, Eccles M, et al. Improving patient care: The implementation of change in health  
42  
43 479 care. John Wiley & Sons 2013.
- 44  
45 480 26 Grol R, Grimshaw J. From best evidence to best practice: Effective implementation of change in  
46  
47 481 patients' care. *Lancet* 2003;362:1225–30.
- 48  
49 482 27 Cummings GG, Estabrooks CA, Midodzi WK, et al. Influence of Organizational Characteristics and  
50  
51 483 Context on Research Utilization. *Nurs Res* 2007;56:S24–39.
- 52  
53 484 28 Li S-A, Jeffs L, Barwick M, et al. Organizational contextual features that influence the implementation  
54  
55 485 of evidence-based practices across healthcare settings: a systematic integrative review. *Syst Rev*  
56  
57 486 2018;7:72.
- 58  
59 487 29 Légaré F, Ratté S, Gravel K, et al. Barriers and facilitators to implementing shared decision-making in  
60  
488 clinical practice: Update of a systematic review of health professionals' perceptions. *Patient Educ Couns*.

1  
2  
3 489 2008;73:526–35.

4  
5 490 30 Frerichs W, Hahlweg P, Müller E, et al. Shared decision-making in oncology – a qualitative analysis of  
6  
7 491 healthcare providers' views on current practice. *PLoS One* 2016;11:e0149789.

8  
9 492 31 Scholl I, LaRussa A, Hahlweg P, et al. Organizational- and system-level characteristics that influence  
10  
11 493 implementation of shared decision-making and strategies to address them - a scoping review. *Implement*  
12  
13 494 *Sci* 2018;13:40.

14  
15 495 32 André B, Sjøvold E. What characterizes the work culture at a hospital unit that successfully  
16  
17 496 implements change - a correlation study. *BMC Health Serv Res* 2017;17:486.

18  
19 497 33 Armenakis AA, Harris SG, Mossholder KW. Creating Readiness for Organizational Change. *Hum*  
20  
21 498 *Relations* 1993;46:681–703.

22  
23 499 34 Kash BA, Spaulding A, Gamm LD, et al. Leadership, culture, and organizational technologies as  
24  
25 500 absorptive capacity for innovation and transformation in the healthcare sector: A framework for research.  
26  
27 501 *Chang Manag* 2014;13:1–13.

28  
29 502 35 Armenakis AA, Harris SG, Mossholder KW. Creating Readiness for Organizational Change. *Hum*  
30  
31 503 *Relations* 1993;46:681–703.

32  
33 504 36 Weiner BJ. A theory of organizational readiness for change. *Implement Sci* 2009;4:67.

34  
35 505 37 Armenakis AA, Harris SG. Crafting a change message to create transformational readiness. *J Organ*  
36  
37 506 *Chang Manag* 2002;15:169–83.

38  
39 507 38 Holt D, Armenakis A, Harris S, et al. Toward a Comprehensive Definition of Readiness for Change: A  
40  
41 508 Review of Research and Instrumentation. *Res Organ Chang Dev.* 2007;16:289–336.

42  
43 509 39 Shea CM, Jacobs SR, Esserman DA, et al. Organizational readiness for implementing change: A  
44  
45 510 psychometric assessment of a new measure. *Implement Sci* 2014;9:7.

46  
47 511 40 Gagnon M-P, Attieh R, Ghandour EK, et al. A Systematic Review of Instruments to Assess  
48  
49 512 Organizational Readiness for Knowledge Translation in Health Care. *PLoS One* 2014;9:e114338.

50  
51 513 41 Storkholm MH, Mazzocato P, Tessma MK, et al. Assessing the reliability and validity of the Danish  
52  
53 514 version of Organizational Readiness for Implementing Change (ORIC). *Implement Sci* 2018;13:78.

54  
55 515 42 Ruest M, Leonard G, Thomas A, et al. French cross-cultural adaptation of the Organizational  
56  
57 516 Readiness for Implementing Change (ORIC). *BMC Health Serv Res* 2019;19:535.

58  
59 517 43 Alexander JA, Hearld LR. Methods and metrics challenges of delivery-system research. *Implement Sci*  
60  
518 2012;7:15.

- 1  
2  
3 519 44 Harkness J, Pennell BE, Schoua-Glusberg A. Methods for Testing and Evaluating Survey  
4  
5 520 Questionnaires. In: Presser S, Rothgeb J, Couper M, Lessler J, Martin E, Martin J, et al., editors. *Surv*  
6  
7 521 *Quest Transl Assess*. Hoboken (NJ): JohnWiley & Sons; 2004:453–73.
- 8  
9 522 45 Mokkink LB, Terwee CB, Patrick DL, et al. The COSMIN study reached international consensus on  
10  
11 523 taxonomy, terminology, and definitions of measurement properties for health-related patient-reported  
12  
13 524 outcomes. *J Clin Epidemiol* 2010;63:737–45.
- 14  
15 525 46 Terwee CB, Prinsen CAC, Chiarotto A, et al. COSMIN methodology for evaluating the content validity  
16  
17 526 of patient-reported outcome measures: a Delphi study. *Qual Life Res* 2018;27:1159–70.
- 18  
19 527 47 Willis GB, Research Triangle Institute. Cognitive interviewing - a “how to” guide. 1999.
- 20  
21 528 48 Scholl I, Hahlweg P, Lindig A, et al. Evaluation of a program for routine implementation of shared  
22  
23 529 decision-making in cancer care : study protocol of a stepped wedge cluster randomized trial. *Implement*  
24  
25 530 *Sci* 2018:1–10.
- 26  
27 531 49 Degner LF, Sloan JA, Venkatesh P. The Control Preferences Scale. *Can J Nurs Res* 1997;29:21–43.
- 28  
29 532 50 Giguere A, Bogza LM, Coudert L, et al. Validation of the IcanSDM instrument to assess clinicians’  
30  
31 533 perceptions of their ability to adopt shared decision making [in preparation].
- 32  
33 534 51 Hahlweg P, Härter M, Nestoriuc Y, et al. How are decisions made in cancer care? A qualitative study  
34  
35 535 using participant observation of current practice. *BMJ Open* 2017;7:e016360.
- 36  
37 536 52 Rattray J, Jones MC. Essential elements of questionnaire design and development. *J Clin Nurs*  
38  
39 537 2007;16:234–43.
- 40  
41 538 53 Streiner DL, Norman GR, Cairney J. Health measurement scales: A practical guide to their  
42  
43 539 development and use. 2015.
- 44  
45 540 54 Schermelleh-Engel K, Moosbrugger H, Müller H. Evaluating the Fit of Structural Equation Models:  
46  
47 541 Tests of Significance and Descriptive Goodness-of-Fit Measures. *Meth Psychol Res Online* 2003;8:23–  
48  
49 542 74.
- 50  
51 543 55 Hu L, Bentler P. Cutoff criteria for fit indexes in covariance structure analysis: conventional criteria  
52  
53 544 versus new alternatives. *Struct Eq Model* 1999;6:1–55.
- 54  
55 545 56 Hair J, Black W, Babin B, et al. Multivariate data analysis. Upper Saddle River, NJ: Pearson Prentice  
56  
57 546 Hall 2009.
- 58  
59 547 57 Hooper D, Coughlan J, Mullen M. Structural Equation Modelling: Guidelines for Determining Model Fit.  
60  
61 548 *Articles* 2008.



- 1  
2  
3 549 58 McHorney CA, Tarlov AR. Individual-patient monitoring in clinical practice: are available health status  
4  
5 550 surveys adequate? *Qual Life Res* 1995;4:293–307.  
6  
7 551 59 Ferketich S. Focus on psychometrics. Aspects of item analysis. *Res Nurs Health* 1991;14:165–8.  
8  
9 552 60 Bannigan K, Watson R. Reliability and validity in a nutshell. *J Clin Nurs* 2009;18:3237–43.  
10  
11 553 61 Bentler PM. Comparative fit indexes in structural models. *Psychol Bull* 1990;107:238–46.  
12  
13 554 62 Browne MW, Cudeck R. Single Sample Cross-Validation Indices for Covariance Structures.  
14  
15 555 *Multivariate Behav Res* 1989;24:445–55.  
16  
17 556 63 Hutton J, Eccles M, Grimshaw J. Ethical issues in implementation research: A discussion of the  
18  
19 557 problems in achieving informed consent. *Implement Sci* 2008;3:52.  
20  
21 558 64 Cabrera-Nguyen P. Author Guidelines for Reporting Scale Development and Validation Results. *J Soc*  
22  
23 559 *Social Work Res* 2010;1:99–103.  
24  
25  
26  
27  
28  
29  
30  
31  
32  
33  
34  
35  
36  
37  
38  
39  
40  
41  
42  
43  
44  
45  
46  
47  
48  
49  
50  
51  
52  
53  
54  
55  
56  
57  
58  
59  
60

1  
2  
3 **1 Supplementary File 1: Results of psychometric analysis of the 9-item German ORIC: Factor**  
4 **analysis, corrected item-total correlations, Cronbach's  $\alpha$**   
5  
6  
7  
8

9 **4 Structural validity**

10 To get information about the factorial structure of the 9-item German ORIC, an exploratory factor  
11 analysis was conducted. KMO measure was .926 and Barlett's test of sphericity was significant ( $X^2 =$   
12 1302.78,  $p < .001$ ), indicating that a factor analysis of the data was appropriate to observe data. Table  
13 A shows results of the exploratory factor analysis. Since the main component explains 66% of the  
14 variance, a one-factor model could be assumed. The factor loading for the first component can be  
15 observed in table B.  
16  
17  
18  
19  
20  
21  
22  
23

24 Table A: Results of exploratory factor analysis of the 9-item German ORIC.  
25

|             | Eigenvalue |               |              |
|-------------|------------|---------------|--------------|
|             | Total      | % of variance | Cumulative % |
| Component 1 | 6.02       | 66.85         | 66.85        |
| Component 2 | 0.802      | 8.91          | 75.76        |
| Component 3 | 0.472      | 5.25          | 81.01        |
| Component 4 | 0.392      | 4.35          | 85.37        |
| Component 5 | 0.366      | 4.06          | 89.43        |
| Component 6 | 0.304      | 3.38          | 92.81        |
| Component 7 | 0.250      | 2.78          | 95.59        |
| Component 8 | 0.232      | 2.57          | 98.16        |
| Component 9 | 0.165      | 1.84          | 100.00       |

26  
27  
28  
29  
30  
31  
32  
33  
34  
35  
36  
37 Notes: Eigenvalues of the nine components of the German ORIC, percentage  
38 of explained variance and cumulative percentage of explained variance of  
39 each component. For EFA, the sample was split and  $n=115$ .  
40  
41  
42

43 Table B: Factor loadings on the first component.  
44

|        | Component 1 |
|--------|-------------|
| Item 1 | 0.860       |
| Item 2 | 0.856       |
| Item 3 | 0.837       |
| Item 4 | 0.836       |
| Item 5 | 0.835       |
| Item 6 | 0.799       |
| Item 7 | 0.797       |
| Item 8 | 0.791       |
| Item 9 | 0.739       |

45  
46  
47  
48  
49  
50  
51  
52  
53  
54  
55 Notes: For EFA, the sample was  
56 split and  $n=115$ .  
57  
58  
59  
60

17 A confirmatory factor analysis was performed with the one-factor model to analyse its fit indices. Indices  
 18 of the one-factor model are presented in table C.

20 Table C: Fit indices of the one-factor model of the 9-item German ORIC.

|                  | Chi <sup>2</sup> <sup>1</sup> | df <sup>2</sup> | Chi <sup>2</sup> /df <sup>3</sup> | CFI <sup>4</sup> | TLI <sup>5</sup> | RMSEA <sup>6</sup> | AIC <sup>7</sup> | PNFI <sup>8</sup> |
|------------------|-------------------------------|-----------------|-----------------------------------|------------------|------------------|--------------------|------------------|-------------------|
| One-factor model | 56.04                         | 27              | 2.08                              | .945             | .927             | .097               | 92.04            | .676              |

Notes: One-factor model (including a split data set of n=115): includes items 1 to 9.

<sup>1</sup> discrepancy chi-squared statistic, <sup>2</sup> degrees of freedom, <sup>3</sup> normed chi-squared statistic, <sup>4</sup> comparative fit indexes, <sup>5</sup> Tucker-Lewis Index, <sup>6</sup> root mean square error of approximation, <sup>7</sup> Akaike Information Criterion, <sup>8</sup> Parsimonious Normed Fit Index (PNFI). \*  $p = .000$

### 22 Descriptive analysis of items of the 9-item ORIC version and reliability analysis

23 Table D shows the corrected item-total correlation. Corrected item-total correlation ranged from .665  
 24 (item 9) to .744 (item 3).

26 Table D: Discrimination of the nine items of the German ORIC.

|        | Item discrimination<br>(corrected item-total<br>correlation) |
|--------|--------------------------------------------------------------|
| Item 1 | .747                                                         |
| Item 2 | .696                                                         |
| Item 3 | .777                                                         |
| Item 4 | .760                                                         |
| Item 5 | .762                                                         |
| Item 6 | .759                                                         |
| Item 7 | .720                                                         |
| Item 8 | .691                                                         |
| Item 9 | .638                                                         |

Notes: Items could be answered on a  
 5-step Likert scale rating from 0 „  
 disagree“ to 4 „agree“.

28  
 29  
 30 Cronbach's  $\alpha$  with  $\alpha = .924$  showed the measure to reach excellent reliability.

1  
2  
3 **1 Supplementary File 2: Additional tables for psychometric evaluation of 10-item ORIC version**  
4  
5  
6

7 **3 Table A: Demographic data of participants of cognitive interviews (n=11).**  
8

|                                   |                  | Frequencies<br>for n=11 |
|-----------------------------------|------------------|-------------------------|
| Age                               | < 30 years       | 1                       |
|                                   | 31-40 years      | 3                       |
|                                   | 41-50 years      | 3                       |
|                                   | > 50 years       | 4                       |
| Gender                            | Female           | 9                       |
|                                   | Male             | 2                       |
| Profession*                       | Nurse            | 8                       |
|                                   | Physician        | 2                       |
|                                   | Psychooncologist | 3                       |
| Work experience in<br>health care | > 5 years        | 3                       |
|                                   | 5-10 years       | 4                       |
|                                   | 11-20 years      | 3                       |
|                                   | > 20 years       | 1                       |

24 **4** \* multiple answers possible  
25 **5**

26  
27 **6 Table B: Factor loadings on the first component.**  
28

|         | Component 1 |
|---------|-------------|
| Item 1  | 0.790       |
| Item 2  | 0.788       |
| Item 3  | 0.833       |
| Item 4  | 0.846       |
| Item 5  | 0.831       |
| Item 6  | 0.851       |
| Item 7  | 0.839       |
| Item 8  | 0.800       |
| Item 9  | 0.754       |
| Item 10 | 0.860       |

39  
40 **7** For EFA, the sample was split and n=115.  
41 **8**

42  
43 **9 Table C: Inter-item correlation matrix for the German ORIC.**  
44

|         | Item 1 | Item 2 | Item 3 | Item 4 | Item 5 | Item 6 | Item 7 | Item 8 | Item 9 | Item 10 |
|---------|--------|--------|--------|--------|--------|--------|--------|--------|--------|---------|
| Item 1  | 1.000  | .634   | .650   | .611   | .652   | .587   | .558   | .538   | .507   | .542    |
| Item 2  | .634   | 1.000  | .586   | .681   | .607   | .518   | .504   | .485   | .434   | .478    |
| Item 3  | .650   | .586   | 1.000  | .673   | .723   | .636   | .600   | .558   | .492   | .560    |
| Item 4  | .611   | .681   | .673   | 1.000  | .675   | .588   | .531   | .541   | .512   | .551    |
| Item 5  | .652   | .607   | .723   | .675   | 1.000  | .622   | .621   | .466   | .474   | .578    |
| Item 6  | .587   | .518   | .636   | .588   | .622   | 1.000  | .677   | .590   | .588   | .573    |
| Item 7  | .558   | .504   | .600   | .531   | .621   | .677   | 1.000  | .612   | .491   | .567    |
| Item 8  | .538   | .485   | .558   | .541   | .466   | .590   | .612   | 1.000  | .611   | .560    |
| Item 9  | .507   | .434   | .492   | .512   | .474   | .588   | .491   | .611   | 1.000  | .659    |
| Item 10 | .542   | .478   | .560   | .551   | .578   | .573   | .567   | .560   | .659   | 1.000   |

56  
57 **10**  
58  
59  
60

1  
2  
3 **1 Supplementary File 3: Organizational Readiness for Implementing Change (ORIC) – German**  
4 **2 version**  
5  
6  
7

8 Bitte geben Sie an, wie sehr Sie den folgenden Aussagen zur Umsetzung von partizipativer  
9 Entscheidungsfindung an Ihrem aktuellen Arbeitsplatz zustimmen. Falls partizipative  
10 Entscheidungsfindung aktuell nicht umgesetzt wird, wie wäre es im Falle der Umsetzung?  
11  
12

|    |    | stimme<br>nicht<br>zu                                                                                                                                                 | stimme<br>eher<br>nicht<br>zu | teils<br>teils           | stimme<br>eher<br>zu     | stimme<br>zu             |
|----|----|-----------------------------------------------------------------------------------------------------------------------------------------------------------------------|-------------------------------|--------------------------|--------------------------|--------------------------|
| 17 | 1  |                                                                                                                                                                       |                               |                          |                          |                          |
| 18 |    | <input type="checkbox"/>                                                                                                                                              | <input type="checkbox"/>      | <input type="checkbox"/> | <input type="checkbox"/> | <input type="checkbox"/> |
| 19 |    | Personen, die hier arbeiten, zeigen hohes Engagement bei der Umsetzung von partizipativer Entscheidungsfindung.                                                       |                               |                          |                          |                          |
| 21 | 2  |                                                                                                                                                                       |                               |                          |                          |                          |
| 22 |    | <input type="checkbox"/>                                                                                                                                              | <input type="checkbox"/>      | <input type="checkbox"/> | <input type="checkbox"/> | <input type="checkbox"/> |
| 23 |    | Personen, die hier arbeiten, werden tun, was auch immer nötig ist, um partizipative Entscheidungsfindung umzusetzen.                                                  |                               |                          |                          |                          |
| 25 | 3  |                                                                                                                                                                       |                               |                          |                          |                          |
| 26 |    | <input type="checkbox"/>                                                                                                                                              | <input type="checkbox"/>      | <input type="checkbox"/> | <input type="checkbox"/> | <input type="checkbox"/> |
| 27 |    | Personen, die hier arbeiten, wollen partizipative Entscheidungsfindung umsetzen.                                                                                      |                               |                          |                          |                          |
| 28 | 4  |                                                                                                                                                                       |                               |                          |                          |                          |
| 29 |    | <input type="checkbox"/>                                                                                                                                              | <input type="checkbox"/>      | <input type="checkbox"/> | <input type="checkbox"/> | <input type="checkbox"/> |
| 30 |    | Personen, die hier arbeiten, sind fest entschlossen, partizipative Entscheidungsfindung umzusetzen.                                                                   |                               |                          |                          |                          |
| 32 | 5  |                                                                                                                                                                       |                               |                          |                          |                          |
| 33 |    | <input type="checkbox"/>                                                                                                                                              | <input type="checkbox"/>      | <input type="checkbox"/> | <input type="checkbox"/> | <input type="checkbox"/> |
| 34 |    | Personen, die hier arbeiten, sind motiviert, partizipative Entscheidungsfindung umzusetzen.                                                                           |                               |                          |                          |                          |
| 36 | 6  |                                                                                                                                                                       |                               |                          |                          |                          |
| 37 |    | <input type="checkbox"/>                                                                                                                                              | <input type="checkbox"/>      | <input type="checkbox"/> | <input type="checkbox"/> | <input type="checkbox"/> |
| 38 |    | Eventuell entstehen bei der Umsetzung von partizipativer Entscheidungsfindung Herausforderungen. Personen, die hier arbeiten, sind zuversichtlich, diese zu meistern. |                               |                          |                          |                          |
| 41 | 7  |                                                                                                                                                                       |                               |                          |                          |                          |
| 42 |    | <input type="checkbox"/>                                                                                                                                              | <input type="checkbox"/>      | <input type="checkbox"/> | <input type="checkbox"/> | <input type="checkbox"/> |
| 43 |    | Personen, die hier arbeiten, sind zuversichtlich, dass sie den Verlauf der Umsetzung von partizipativer Entscheidungsfindung überblicken können.                      |                               |                          |                          |                          |
| 46 | 8  |                                                                                                                                                                       |                               |                          |                          |                          |
| 47 |    | <input type="checkbox"/>                                                                                                                                              | <input type="checkbox"/>      | <input type="checkbox"/> | <input type="checkbox"/> | <input type="checkbox"/> |
| 48 |    | Personen, die hier arbeiten, sind zuversichtlich, dass sie Aufgaben so koordinieren können, dass die Umsetzung reibungslos abläuft.                                   |                               |                          |                          |                          |
| 51 | 9  |                                                                                                                                                                       |                               |                          |                          |                          |
| 52 |    | <input type="checkbox"/>                                                                                                                                              | <input type="checkbox"/>      | <input type="checkbox"/> | <input type="checkbox"/> | <input type="checkbox"/> |
| 53 |    | Personen, die hier arbeiten, sind zuversichtlich, dass die Klinik sie dabei unterstützen kann, partizipative Entscheidungsfindung umzusetzen.                         |                               |                          |                          |                          |
| 55 | 10 |                                                                                                                                                                       |                               |                          |                          |                          |
| 56 |    | <input type="checkbox"/>                                                                                                                                              | <input type="checkbox"/>      | <input type="checkbox"/> | <input type="checkbox"/> | <input type="checkbox"/> |
| 57 |    | Personen, die hier arbeiten, sind zuversichtlich, Machenschaften bei der Umsetzung von partizipativer Entscheidungsfindung bewältigen zu können.                      |                               |                          |                          |                          |
| 58 |    |                                                                                                                                                                       |                               |                          |                          |                          |
| 59 |    |                                                                                                                                                                       |                               |                          |                          |                          |
| 60 |    |                                                                                                                                                                       |                               |                          |                          |                          |

10

Supplementary File 4: Confirmatory factor analysis model of the 10-item German ORIC

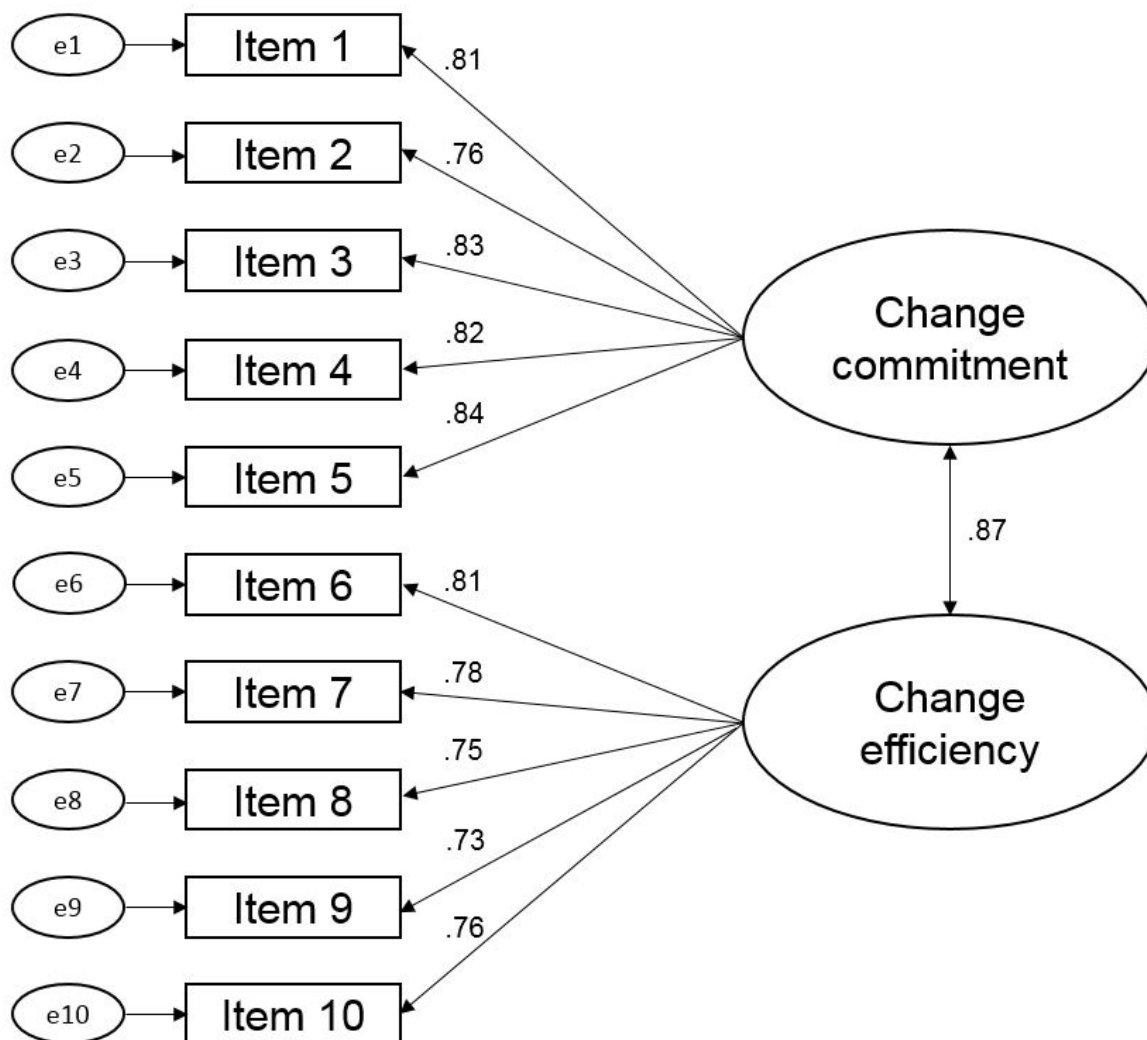

1 **Supplementary File 5: Checklist for reporting standards. Authors guideline for Scale**2 **Development and validation results by Cabrera-Nguyen [1].**

|   | <b>Guidelines by Cabrera-Nguyen [1]</b>                                                                                                                                                                                                                                                                                                                                                                                                                                                                              | <b>Transfer to our study</b>                                                                                                                                                                                                                                        |
|---|----------------------------------------------------------------------------------------------------------------------------------------------------------------------------------------------------------------------------------------------------------------------------------------------------------------------------------------------------------------------------------------------------------------------------------------------------------------------------------------------------------------------|---------------------------------------------------------------------------------------------------------------------------------------------------------------------------------------------------------------------------------------------------------------------|
| 1 | Precisely define the target construct.                                                                                                                                                                                                                                                                                                                                                                                                                                                                               | See page 3 and 4 (Introduction section)                                                                                                                                                                                                                             |
| 2 | Justify the need for your new measure. For example, if measures of the construct exist in the literature, explain the value added by your new scale. How might the new measure enhance the substantive knowledge base or social work practice?                                                                                                                                                                                                                                                                       | See page 3 and 4 (Introduction section)                                                                                                                                                                                                                             |
| 3 | Indicate that you have submitted your initial pool of items to expert review (Worthington & Whittaker, 2006). Report (a) the number of items in the preliminary pool; (b) the number of expert reviewers and their qualifications; and (c) any major changes to your initial item pool following the review (e.g., a substantial decrease in the number of items, changes to the original item response format, overhaul of item pool due to experts' assessment regarding content validity).                        | See page 4 and 5 (Methods section: Measure, Translation, Assessment of comprehensibility and adaption of the scale) and page 8 and 9 (Results section: Translation, Assessment of comprehensibility and adaption of the scale)                                      |
| 4 | Report the name and version of the statistical software package used for all analyses.                                                                                                                                                                                                                                                                                                                                                                                                                               | See page 5 to 7 (Methods section: Assessment of comprehensibility and adaption of the scale, Psychometric evaluation)                                                                                                                                               |
| 5 | Identify and justify the sampling strategy (e.g., convenience, snowball) and sampling frame. Report standard sample demographic characteristics as well as other salient sample characteristics.                                                                                                                                                                                                                                                                                                                     | See page 5 and 6 (Methods section: Assessment of comprehensibility and adaption of the scale, Psychometric evaluation) and page 8 to 10 (Results section: Assessment of comprehensibility and adaption of the scale, Psychometric evaluation) and Additional file 3 |
| 6 | Discuss relevant data preparation and screening procedures. For instance, do the data meet the appropriate assumptions for factor analysis? If not, what actions were taken? Report tests of factorability if appropriate (e.g., report Bartlett's test of sphericity).                                                                                                                                                                                                                                              | See page 9 and 10 (Results section: Psychometric evaluation)                                                                                                                                                                                                        |
| 7 | Provide all dates of data collection.                                                                                                                                                                                                                                                                                                                                                                                                                                                                                | See page 8 to 12 (Results section)                                                                                                                                                                                                                                  |
| 8 | Avoid use of principal components analysis (PCA) as a precursor to CFA (Costello & Osborne, 2005; Worthington & Whittaker, 2006). Instead, start with EFA to assess the underlying factor structure and refine the item pool. EFA should be followed by CFA using a different sample (or samples) to evaluate the EFA-informed a priori theory about the measure's factor-structure and psychometric properties. (Costello & Osborne, 2005; Henson & Roberts, 2006; Worthington & Whittaker, 2006). For CFA, authors | An a priori hypothesized model for CFA was specified based on the original measures structure. The model could not be confirmed and an EFA was calculated afterwards. The same data set was used for EFA and CFA. For more                                          |

|   |                                                                                                                                                                                                                                                                                                                                                                                                                                                                                                                                                                                                                                                                                                                                                                                                                                                                                                                                                                                                                                                                                                                                                                                                                                                                                                         |                                                                                                                                                                                                      |
|---|---------------------------------------------------------------------------------------------------------------------------------------------------------------------------------------------------------------------------------------------------------------------------------------------------------------------------------------------------------------------------------------------------------------------------------------------------------------------------------------------------------------------------------------------------------------------------------------------------------------------------------------------------------------------------------------------------------------------------------------------------------------------------------------------------------------------------------------------------------------------------------------------------------------------------------------------------------------------------------------------------------------------------------------------------------------------------------------------------------------------------------------------------------------------------------------------------------------------------------------------------------------------------------------------------------|------------------------------------------------------------------------------------------------------------------------------------------------------------------------------------------------------|
|   | should specify an a priori hypothesized model and a priori competing models (Jackson, Gillaspay, & Purc-Stephenson, 2009).                                                                                                                                                                                                                                                                                                                                                                                                                                                                                                                                                                                                                                                                                                                                                                                                                                                                                                                                                                                                                                                                                                                                                                              | information see page 6 and 7 (Results section).                                                                                                                                                      |
| 9 | Guidelines for reporting EFA results.                                                                                                                                                                                                                                                                                                                                                                                                                                                                                                                                                                                                                                                                                                                                                                                                                                                                                                                                                                                                                                                                                                                                                                                                                                                                   |                                                                                                                                                                                                      |
|   | How large is a sample? One common rule of thumb is to ensure a person-to-item ratio of 10:1. Another rule of thumb is that N= 300 is usually acceptable (Worthington & Whittaker, 2006). However, some researchers have criticized these sample size rules of thumb, noting the appropriate sample size is dependent on the features of the gathered data. These researchers recommend obtaining the largest possible sample because the adequacy of the sample size cannot be determined until after the data have been analyzed (Henson & Roberts, 2006).                                                                                                                                                                                                                                                                                                                                                                                                                                                                                                                                                                                                                                                                                                                                             | Sample size is n=115, person-to-item ratio 11.5:1 (see page 6: Methods section, Psychometric analysis)                                                                                               |
|   | Run EFA . . . or not. Run a preliminary EFA to determine if further data collection is required based on the following criteria: (a) If communalities are greater than .50 or there are 10:1 items per factor with factor loadings of roughly  .4 , then a sample size of 150 to 200 is likely to be adequate; (b) If communalities are all at least .60 or there are a minimum of 4:1 items per factor with factor loadings above  .6 , then even smaller sample sizes may suffice; (Worthington & Whittaker, 2006). Report if additional data collection was necessary due to inadequate sample size. If so, report the new participants' sociodemographic characteristics and test for differences between groups using standard statistical procedures (e.g., ttests).                                                                                                                                                                                                                                                                                                                                                                                                                                                                                                                              | EFA communalities are all above .70, therefore the sample size of n=115 can be determined as adequate and no additional data collection was necessary. For more information, see Additional file 3). |
|   | Give EFA details. Report the specific rotation strategy used (e.g. varimax, geomin). Justify the decision to use an orthogonal or oblique solution. One recommendation is to always begin with an oblique rotation, empirically assess factor intercorrelations, and report them before deciding upon a final rotation solution (Henson & Roberts, 2006; Worthington &Whittaker, 2006). Some researchers argue oblique rotation is always the best approach because (a) factor intercorrelations are the norm in social sciences and (b) both approaches yield the same result if the factors happen to be uncorrelated (Costello & Osborne, 2005). Conversely, other researchers contend that orthogonal rotation is preferable because fewer parameters are estimated—orthogonal rotation is more parsimonious and amenable to replication (Henson &Roberts, 2006). Similarly, some researchers warn against relying on a statistical software package's default settings to determine the appropriate type of oblique rotation (Henson & Roberts, 2006; Worthington &Whittaker, 2006). Others state that doing so is —finell (Costello & Osborne, 2005, p.3). Given the lack of consensus, it is probably best to describe what you do and defend your approach on substantive grounds, if possible. | See page 6 and 7 (Methods section: Psychometric evaluation)                                                                                                                                          |
|   | Report the whole factor pattern/structure. Always report the whole factor pattern/structure matrix, including all of the items in the analysis. It is recommended that authors report                                                                                                                                                                                                                                                                                                                                                                                                                                                                                                                                                                                                                                                                                                                                                                                                                                                                                                                                                                                                                                                                                                                   | See page 10 (Results section: Psychometric evaluation) and Additional file 3                                                                                                                         |



|    |                                                                                                                                                                                                                                                                                                                                                                                                                                                                                    |                                                                                                                                                                                                                        |
|----|------------------------------------------------------------------------------------------------------------------------------------------------------------------------------------------------------------------------------------------------------------------------------------------------------------------------------------------------------------------------------------------------------------------------------------------------------------------------------------|------------------------------------------------------------------------------------------------------------------------------------------------------------------------------------------------------------------------|
|    | <p>this information in a chart following the example provided by Henson and Roberts (2006) on page 411.</p>                                                                                                                                                                                                                                                                                                                                                                        |                                                                                                                                                                                                                        |
|    | <p>Criteria for deleting (crossloaded) items. Report any deleted items and the criteria used for deletion. Crossloading items with values <math>\geq .32</math> on at least two factors should generally be candidates for deletion, especially if there are other items with factor loadings of .50 or greater (Costello &amp; Osborne, 2005). Rerun the EFA each time an item is deleted.</p>                                                                                    | <p>No crossloading items could be observed, so item deletion was not necessary.</p>                                                                                                                                    |
|    | <p>Criteria for number of factors. Report the number of factors retained and justify this decision using multiple criteria (eigenvalue <math>&gt; 1</math>, scree test, parallel analysis, rejection of a factor with fewer than 3 items, etc). Reporting the eigenvalue <math>&gt; 1</math> rule alone is inadequate because it has been shown to among the least accurate criteria for assessing factor retention (Costello &amp; Osborne, 2005; Henson &amp; Roberts, 2006)</p> | <p>See page 6 and 7 (Methods section: Psychometric evaluation)</p>                                                                                                                                                     |
|    | <p>Explained variance. Report the variance explained by the factors.</p>                                                                                                                                                                                                                                                                                                                                                                                                           | <p>See page 10 (Results section: Psychometric evaluation) and Additional file 3</p>                                                                                                                                    |
|    | <p>In general, describe your decisions.</p>                                                                                                                                                                                                                                                                                                                                                                                                                                        | <p>See page 10 (Results section: Psychometric evaluation) and Additional file 3</p>                                                                                                                                    |
| 10 | <p>Guidelines for reporting CFA results.</p>                                                                                                                                                                                                                                                                                                                                                                                                                                       |                                                                                                                                                                                                                        |
|    | <p>Describe and justify the theoretical model. Report hypothesized factor structure. Provide theoretical and empirical justification (e.g., results of preliminary EFAs) for your hypothesis. In addition, report a priori competing models.</p>                                                                                                                                                                                                                                   | <p>See page 6 and 7 (Methods section: Psychometric evaluation)</p>                                                                                                                                                     |
|    | <p>Describe the parameterization. Provide a comprehensive description of the a priori parameter specification. Identify fixed parameters, free parameters, and constrained parameters. For example, indicate if you freed the errors of any items to correlate.</p>                                                                                                                                                                                                                | <p>One factor loading was constrained to equal 1, the corresponding intercept was constrained equal to zero. The other factor loadings and intercepts were estimated. Errors of items were not freed to correlate.</p> |
|    | <p>Include a figure. Include a figure of each CFA model being tested using Kline's (2005) graphical conventions if feasible.</p>                                                                                                                                                                                                                                                                                                                                                   | <p>See Additional file 5</p>                                                                                                                                                                                           |
|    | <p>Identification. Demonstrate model identification (e.g., <math>df &gt; 0</math>; scaling of factors; assess and report the <math>-t</math>-rule; the two-indicator rule). Necessary and sufficient conditions for model identification may vary for certain types of CFA models. When in doubt, authors should consult Brown's (2006) CFA text or Kline's (2005) SEM text for guidance.</p>                                                                                      | <p>See page 10 and 11 (Results section: Psychometric evaluation)</p>                                                                                                                                                   |
|    | <p>Select an estimator based on distributional patterns and assumptions. Report the estimator used (e.g., ML, WLSMV) and justify your choice based on distributional</p>                                                                                                                                                                                                                                                                                                           | <p>See page 6 (Methods section: Psychometric evaluation)</p>                                                                                                                                                           |

|    |                                                                                                                                                                                                                                                                                                                                                                                                                                                                                                                                                                                             |                                                                                                                           |
|----|---------------------------------------------------------------------------------------------------------------------------------------------------------------------------------------------------------------------------------------------------------------------------------------------------------------------------------------------------------------------------------------------------------------------------------------------------------------------------------------------------------------------------------------------------------------------------------------------|---------------------------------------------------------------------------------------------------------------------------|
|    | assumptions. It is not appropriate to report that you relied on your statistical software's default setting.                                                                                                                                                                                                                                                                                                                                                                                                                                                                                |                                                                                                                           |
|    | Use multiple fit indices. After estimating a model, always report multiple fit indices (e.g., model X <sup>2</sup> , df, p, CFI/TLI, RMSEA, SRMR). Report all appropriate fit indices, not just those favorable to your hypotheses (Jackson et al., 2009). For example, do not report acceptable CFI and TLI scores while omitting a relevant fit index with a suboptimal value.                                                                                                                                                                                                            | See page 6 and 7 (Methods section: Psychometric evaluation) and page 10 and 11 (Results section: Psychometric evaluation) |
|    | What is acceptable fit? For model fit indices, authors should generally use the cut-off values recommended by Hu and Bentler (1999) and endorsed by Brown (2006), assuming ML estimation: a. CFI/TLI ≥ .95 b. RMSEA ≤ .06 c. SRMR ≤ .08                                                                                                                                                                                                                                                                                                                                                     | See page 8 (Methods section: Psychometric evaluation)                                                                     |
|    | Localized strain? When reporting model fit, include an assessment for localized areas of strain by examining standardized residuals. Standardized residuals greater than 1.96 (for p < .05) indicate areas of strain (Harrington, 2009). Report the absence of localized strain, if appropriate; otherwise, note localized areas of strain by reporting the relevant standardized residuals.                                                                                                                                                                                                | Standardized residuals do not indicate localized strains.                                                                 |
|    | Parameter estimates and SEs. When reporting factor loadings and other parameter estimates, always report the unstandardized estimates, their p values, and the standard errors. In addition, include the standardized estimates when appropriate. Be sure to report all parameter estimates, even those that are non significant (Brown, 2006; Jackson et al., 2009).                                                                                                                                                                                                                       | See Additional file 5                                                                                                     |
|    | Assessing the validity of the factor solution. Comment on the new measure's convergent and discriminant validity based on parameter estimates. For instance, factor correlations ≥ .80 may indicate poor discriminant validity (Brown, 2006). In addition, strong factor loadings that do not crossload may indicate good convergent validity. One rule of thumb is that factor loadings < .40 are weak and factor loadings ≥ .60 are strong (Garson, 2010).                                                                                                                                | Exploratory factor analysis revealed a one-factor model, so there are no factor correlations.                             |
|    | Other measures. Report squared multiple correlations and comment on the measure's reliability (e.g., report Raykov's Rho if appropriate)                                                                                                                                                                                                                                                                                                                                                                                                                                                    | See page 11 (Results section: Psychometric analysis)                                                                      |
|    | Respecification: Caution! Report any post-hoc respecifications to improve model fit based on modification indices. Justify the respecifications on theoretical or conceptual grounds (Jackson et al., 2009). Respecification to allow for correlated errors is not supportable without strong pragmatic justification (e.g., items contain similar words or phrases). Note that respecification precludes comparing the model with your a priori specified competing models. Report improvements in appropriate model fit indices for respecified models (e.g., chi-square difference test) | No respecifications to improve model fit were applied.                                                                    |
| 10 | Describe the matrix (or matrices) you analysed (e.g., covariance, correlation). Include matrices in the manuscript                                                                                                                                                                                                                                                                                                                                                                                                                                                                          | See Additional file 3                                                                                                     |

|    |                                                                                                                                                                                                                                                                                                                                                                                                                                                                     |                                                                                                              |
|----|---------------------------------------------------------------------------------------------------------------------------------------------------------------------------------------------------------------------------------------------------------------------------------------------------------------------------------------------------------------------------------------------------------------------------------------------------------------------|--------------------------------------------------------------------------------------------------------------|
|    | if feasible; otherwise, indicate these data are available upon request.                                                                                                                                                                                                                                                                                                                                                                                             |                                                                                                              |
| 11 | Report the amount of missing data and describe how missing data were handled. For a review of practices for handling missing data, see Sterne and colleagues (2009), Rose and Fraser (2008), and Horton and Kleinman (2007). Provide a rationale for your approach to handling missing data. Authors are encouraged to consider using multiple imputation or model estimation with full-information maximum likelihood (FIML; Rose & Fraser, 2008).                 | See page 6 (Methods section: Psychometric evaluation) and page 11 (Results section: Psychometric evaluation) |
| 12 | Compare your CFA model with the alternative or competing models. Do competing models fit the data better or worse than your model (e.g., does your four-factor model of acculturation fit the data better than a two-factor model or a one-factor model)? Identify the preferable model based on appropriate fit statistics (e.g. chi-square difference test for nested models, Akaike information criterion for non-nested models), parsimony, and relevant theory | See page 13 (Discussions sections)                                                                           |
| 13 | Include your scale (items and response options) in an appendix.                                                                                                                                                                                                                                                                                                                                                                                                     | See Additional file 2                                                                                        |
| 14 | Report how methodological limitations may have impacted findings regarding your measure's psychometric properties (e.g., note potential repercussions of suboptimal sampling techniques, discuss implications of using listwise deletion to handle missing data instead of multiple imputation or FIML).                                                                                                                                                            | See page 14 (Discussions sections)                                                                           |
| 15 | Discuss directions for future research (e.g., if appropriate, testing your scale for measurement invariance by conducting CFA on different populations).                                                                                                                                                                                                                                                                                                            | See page 13 and 14 (Discussions sections)                                                                    |

1 Cabrera-Nguyen P. Author Guidelines for Reporting Scale Development and Validation Results. *J Soc Social Work Res*. University of Chicago Press Chicago, IL 2010;1:99–103.

# BMJ Open

## Translation and psychometric evaluation of the German version of the Organizational Readiness for Implementing Change measure (ORIC) – a cross-sectional study

|                                 |                                                                                                                                                                                                                                                                                                                                                                                                  |
|---------------------------------|--------------------------------------------------------------------------------------------------------------------------------------------------------------------------------------------------------------------------------------------------------------------------------------------------------------------------------------------------------------------------------------------------|
| Journal:                        | <i>BMJ Open</i>                                                                                                                                                                                                                                                                                                                                                                                  |
| Manuscript ID                   | bmjopen-2019-034380.R1                                                                                                                                                                                                                                                                                                                                                                           |
| Article Type:                   | Original research                                                                                                                                                                                                                                                                                                                                                                                |
| Date Submitted by the Author:   | 26-Feb-2020                                                                                                                                                                                                                                                                                                                                                                                      |
| Complete List of Authors:       | Lindig, Anja; University Medical Center Hamburg-Eppendorf, Department of Medical Psychology<br>Hahlweg, Pola; University Medical Center Hamburg-Eppendorf, Department of Medical Psychology<br>Christalle, Eva; University Medical Center Hamburg-Eppendorf, Department of Medical Psychology<br>Scholl, Isabelle; University Medical Center Hamburg-Eppendorf, Department of Medical Psychology |
| <b>Primary Subject Heading</b>: | Research methods                                                                                                                                                                                                                                                                                                                                                                                 |
| Secondary Subject Heading:      | Communication, Evidence based practice, Patient-centred medicine                                                                                                                                                                                                                                                                                                                                 |
| Keywords:                       | Organizational readiness for change, Psychometrics, Translation, Implementation, Shared decision-making, Measurement                                                                                                                                                                                                                                                                             |
|                                 |                                                                                                                                                                                                                                                                                                                                                                                                  |

SCHOLARONE™  
Manuscripts

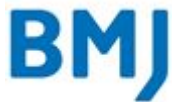

I, the Submitting Author has the right to grant and does grant on behalf of all authors of the Work (as defined in the below author licence), an exclusive licence and/or a non-exclusive licence for contributions from authors who are: i) UK Crown employees; ii) where BMJ has agreed a CC-BY licence shall apply, and/or iii) in accordance with the terms applicable for US Federal Government officers or employees acting as part of their official duties; on a worldwide, perpetual, irrevocable, royalty-free basis to BMJ Publishing Group Ltd ("BMJ") its licensees and where the relevant Journal is co-owned by BMJ to the co-owners of the Journal, to publish the Work in this journal and any other BMJ products and to exploit all rights, as set out in our [licence](#).

The Submitting Author accepts and understands that any supply made under these terms is made by BMJ to the Submitting Author unless you are acting as an employee on behalf of your employer or a postgraduate student of an affiliated institution which is paying any applicable article publishing charge ("APC") for Open Access articles. Where the Submitting Author wishes to make the Work available on an Open Access basis (and intends to pay the relevant APC), the terms of reuse of such Open Access shall be governed by a Creative Commons licence – details of these licences and which [Creative Commons](#) licence will apply to this Work are set out in our licence referred to above.

Other than as permitted in any relevant BMJ Author's Self Archiving Policies, I confirm this Work has not been accepted for publication elsewhere, is not being considered for publication elsewhere and does not duplicate material already published. I confirm all authors consent to publication of this Work and authorise the granting of this licence.

1  
2  
3 1 **Translation and psychometric evaluation of the German version of the Organizational Readiness**  
4  
5 2 **for Implementing Change measure (ORIC) – a cross-sectional study**

6  
7 3 Anja Lindig<sup>1</sup>, Pola Hahlweg<sup>1</sup>, Eva Christalle<sup>1</sup>, Isabelle Scholl<sup>1</sup>  
8  
9 4

10  
11 5  
12 6 <sup>1</sup> *Department of Medical Psychology, University Medical Center Hamburg-Eppendorf, Martinistraße 52,*  
13  
14 7 *20246 Hamburg, Germany*  
15  
16 8

17  
18 9 Email addresses: Anja Lindig: [a.lindig@uke.de](mailto:a.lindig@uke.de)  
19  
20 10 Pola Hahlweg: [p.hahlweg@uke.de](mailto:p.hahlweg@uke.de)  
21  
22 11 Eva Christalle: [e.christalle@uke.de](mailto:e.christalle@uke.de)  
23  
24 12 Isabelle Scholl: [i.scholl@uke.de](mailto:i.scholl@uke.de)  
25  
26 13  
27  
28 14  
29  
30 15

31  
32 16 Corresponding author: Anja Lindig  
33  
34 17 University Medical Center Hamburg-Eppendorf  
35  
36 18 Department of Medical Psychology  
37  
38 19 Martinistr. 52  
39  
40 20 20246 Hamburg, Germany  
41  
42 21 Email: [a.lindig@uke.de](mailto:a.lindig@uke.de)  
43  
44 22 Phone: +49-(0)40-7410-56206  
45  
46 23  
47 24  
48

49 25 Word count: 4186  
50  
51 26  
52  
53 27  
54  
55 28  
56  
57 29  
58  
59 30  
60

1  
2  
3 31 **ABSTRACT**

4  
5 32 **Objectives:** To translate the measure Organizational Readiness for Implementing Change (ORIC) into  
6  
7 33 German and assess its psychometric properties.

8  
9 34 **Design:** Cross-sectional psychometric study based on secondary analysis of baseline data from a shared  
10  
11 35 decision-making (SDM) implementation study.

12  
13 36 **Setting:** Three departments within one academic cancer center in Hamburg, Germany.

14  
15 37 **Participants:** For comprehensibility assessment of the translated ORIC version, we conducted cognitive  
16  
17 38 interviews with n=11 healthcare professionals (HCPs). Afterwards, n=230 HCPs filled out the measure.

18  
19 39 **Primary and Secondary Outcome Measures:** The original English version of the ORIC was translated  
20  
21 40 into German using a team translation protocol. Based on comprehensibility assessment via cognitive  
22  
23 41 interviews with HCPs, the translated version was revised. We analyzed acceptance (completion rate),  
24  
25 42 factorial structure (exploratory factor analysis (EFA), confirmatory factor analysis (CFA), model fit), item  
26  
27 43 characteristics (item difficulties, corrected item-total correlations, inter-item correlations), and internal  
28  
29 44 consistency (Cronbach's  $\alpha$ ).

30  
31 45 **Results:** Translation and cognitive testing of the ORIC was successful except for item 10, which showed  
32  
33 46 low comprehensibility as part of content validity in cognitive interviews. Completion rate was > 97%. EFA  
34  
35 47 and CFA provided a one-factorial structure. Item difficulties ranged between 55.98 and 65.32, corrected  
36  
37 48 item-total-correlation ranged between .665 and .774, inter-item correlations ranged between .434 and .723,  
38  
39 49 and Cronbach's  $\alpha$  was .93.

40  
41 50 **Conclusions:** The German ORIC is a reliable measure with high completion rates and satisfying  
42  
43 51 psychometric properties. A one-factorial structure of the German ORIC was confirmed. Item 10 showed  
44  
45 52 limited comprehensibility and therefore reduces content validity of the measure. The German ORIC can be  
46  
47 53 used to analyze organizational readiness for change as a precursor for implementation success of various  
48  
49 54 interventions.

50  
51 55  
52  
53 56 **Keywords:**  
54  
55 57 Organizational readiness for change, Psychometrics, Translation, Implementation, Shared decision-  
56  
57 58 making, Measurement  
58  
59 59  
60  
60 60

## 61 **ARTICLE SUMMARY**

### 62 **Strengths and limitations of this study**

- 63 • Appropriate qualitative methods were used to provide a German version of the ORIC to be  
64 assessed for healthcare professionals (HCPs).
- 65 • The sample size was large enough to robustly perform the psychometric analyses on the German  
66 version of the ORIC measure.
- 67 • Due to the design of the study as a secondary analysis, it was not possible to calculate  
68 psychometric parameters like convergent and divergent validity.
- 69 • Data were collected at a single academic cancer center in the context of a shared decision-making  
70 implementation study. Thus, psychometric properties of the German ORIC need replication in other  
71 settings.

## 73 **INTRODUCTION**

74 Implementing interventions in healthcare systems is an important and widely discussed topic [1–3] and  
75 often mediated by public policies, market forces, or new technologies [4]. The intention to implement new  
76 interventions might be to reduce costs, improve quality, increase efficacy or patient satisfaction [5].  
77 Nevertheless, implementing change in healthcare organizations can be challenging [6–10]. In the German  
78 healthcare system, the implementation of shared decision-making (SDM) has received much attention [11].  
79 SDM can be described as an interactional process on the basis of information exchange. Patients and  
80 healthcare professionals (HCPs) are equally and actively involved and jointly responsible for the decision  
81 [12–14]. This is especially important in situations with complex treatment options and high impact on  
82 patients' quality of life [15]. Patients want to be actively involved in decision-making [16] and benefit from  
83 SDM by developing better knowledge about their disease and treatment options, better risk perception, and  
84 less insecurity and decisional conflict [17,18]. SDM has been supported by health policy [19–21] and  
85 research [22–25] over the last decades. However, SDM is currently not routinely implemented in the  
86 German healthcare system [11,26–28].

87 When implementing SDM or other interventions in organizations, several barriers on different levels of the  
88 organization (i.e., individual members of the organization, teams, organizational setting, system level) need  
89 consideration [1,5–7,10,29–32]. Barriers for implementing SDM in the clinical setting often address both  
90 the organizational setting (e.g. lack of resources and lack of management support) and the individual level



1  
2  
3 91 (e.g. resistance to change or negative attitudes towards SDM) [7,10,11,33–35]. When implementing SDM  
4  
5 92 or other interventions in healthcare systems, the clinical employees' perspective on organizational  
6  
7 93 readiness for change is a critical precursor for successful implementation [5,32,36–38]. Armenakis et al.  
8  
9 94 [39] describe organizational readiness for change as the degree to which organizational members are  
10  
11 95 prepared to participate in change processes. This is characterized by the belief that the change is needed  
12  
13 96 and that the organization is capable of changing. In their theory of organizational readiness for change,  
14  
15 97 Weiner et al. [40] differentiate between change commitment (i.e., organizational members' attitudes  
16  
17 98 towards implementing a change) and change efficacy (i.e., organizational members' belief in their capability  
18  
19 99 to implement a change). If readiness for change is high, organizational members invest more in the change  
20  
21 100 effort and exhibit greater persistence to overcome barriers and setbacks [40,41].

22 101 To analyze effects of organizational readiness on implementation success, specific measures for assessing  
23  
24 102 organizational readiness for change are needed [5]. However, only a few validated measures exist [5,42–  
25  
26 103 44] and none were available in German. One of those measures is the Organizational Readiness for  
27  
28 104 Implementing Change (ORIC) [43]. The ORIC is brief, easy to administer, and theoretically and  
29  
30 105 psychometrically well-grounded [40]. It was previously translated into Danish and French [45,46]. The ORIC  
31  
32 106 has been psychometrically tested, revealing a completion rate of > 72%, a Cronbach's  $\alpha$  of > .80 and two  
33  
34 107 correlating factors [43,45,46]. Due to the described properties, the ORIC seemed well-suited to measure  
35  
36 108 organizational readiness for implementing SDM in Germany [5,43,47].

37 109 Therefore, the aim of the study was to translate the measure ORIC into German and assess its  
38  
39 110 psychometric properties.

41 111

## 43 112 **METHODS**

### 45 113 **Measure**

47 114 The ORIC measures organizational readiness for implementing change. It uses a 5-point Likert scale  
48  
49 115 ranging from „disagree“ to „agree“ [43]. In the original English version, two subscales were described based  
50  
51 116 on Weiner et al. [40]: „change commitment“ (items 1 to 5) and “change efficacy” (items 6 to 10). Sum scores  
52  
53 117 were calculated for both subscales separately with higher scores indicating higher organizational readiness  
54  
55 118 for change. By using the phrases “to implement this change” or “implementing this change”, the original  
56  
57 119 scale does not specify which change is addressed. The items can be specified to adapt to a specific

1  
2  
3 120 research question and a survey instruction can be added [40,45]. The English items are displayed in the  
4  
5 121 results section.

6  
7 122  
8  
9 123 **Translation**  
10  
11 124 Translation followed the team translation protocol TRAPD (Translation, Review, Adjudication, Pretesting  
12  
13 125 and Documentation), a method with growing recognition within translation research [48]. Thereby an  
14  
15 126 optimal translation is facilitated by discussions between members of the translation team with different  
16  
17 127 expertise in translation. First, two team members (AL, SZ, cp. list of abbreviations) proficient in German  
18  
19 128 and English, but little experienced in survey translation, independently translated the original ORIC into  
20  
21 129 German. Second, a third bilingual team member (IS) with experience in survey translation, reviewed both  
22  
23 130 versions and suggested a third version based on the first two translations. Finally, IS, AL, and SZ discussed  
24  
25 131 all versions until reaching consensus on a final version. To find consensus on item 10 we additionally  
26  
27 132 consulted an official translator (MM, cp. list of abbreviations) and an additional team member (PH), who is  
28  
29 133 proficient in German and English and experienced in translation. During the translation process, we  
30  
31 134 changed the phrases “to implement this change” and “implementing this change” into “to implement shared  
32  
33 135 decision-making” and “implementing shared decision-making” to address our specific research question.  
34  
35 136 Additionally, we added a survey instruction in German which motivated participants to think about the clinic,  
36  
37 137 they are working in, when answering the item.

38  
39 138  
40  
41 139 **Assessment of comprehensibility as part of content validity and subsequent adaptation of the scale**  
42  
43 140 Content validity is the degree to which the content of the measure and its items adequately reflect the  
44  
45 141 measured construct [49]. According to the COSMIN criteria (Consensus-based standards for the selection  
46  
47 142 of health measurement instruments) [50], content validity includes the relevance of the items and scales,  
48  
49 143 their comprehensiveness, and comprehensibility. As this study aimed to evaluate the translation of an  
50  
51 144 existing measure, we focused on the assessment of comprehensibility (i.e., items being appropriately  
52  
53 145 worded and understood by participants as intended).

54  
55 146 To do so, we conducted two rounds of cognitive interviews with a convenience sample of HCPs (nurses,  
56  
57 147 physicians, and psychooncologists), working in a comprehensive cancer center in Germany. Two female  
58  
59 148 researchers and psychologists experienced in interviewing (AL, PH) conducted the interviews. We  
60  
149 developed an interview guide based on recommendations by Willis et al. [51]. We used verbal probing

1  
2  
3 150 techniques like comprehension probes (e.g. "What does the term 'organization' mean to you?") and  
4  
5 151 paraphrasing (e.g. "Can you repeat this sentence in your own words?"). We conducted interviews until  
6  
7 152 reaching theoretical saturation. Interviews were audio-recorded and transcribed verbatim. After the first  
8  
9 153 round of cognitive interviews, we extracted and discussed comments and suggestions from the transcripts  
10  
11 154 (AL, PH, IS). As a further step to enhance comprehensibility, we discussed the items with the original author  
12  
13 155 (CS, cp. list of abbreviations) as well as French (MR, cp. list of abbreviations) and Norwegian researchers  
14  
15 156 (AH, cp. list of abbreviations), who translated the ORIC into their languages. We adapted items of the  
16  
17 157 German ORIC, which were not well understood by participants of the first round of cognitive interviews,  
18  
19 158 according to these discussions. We tested these items in a second round of cognitive interviews. After the  
20  
21 159 second round, we discussed further adaptations of the items and involved another bilingual researcher in the  
22  
23 160 field (DF, cp. list of abbreviations).  
24  
25 161 We calculated descriptive statistics of participants' demographic characteristics using SPSS (IBM SPSS  
26  
27 162 Statistics, Version 23).  
28  
29 163

### 164 **Psychometric evaluation**

31  
32 165 **Data collection.** For psychometric evaluation of the ORIC measure we conducted a secondary analysis of  
33  
34 166 cross-sectional data gathered in a SDM implementation study [52]. Data from baseline assessment of the  
35  
36 167 SDM implementation study were included. The ORIC was the last questionnaire of a three-page survey  
37  
38 168 measuring HCPs' attitudes regarding SDM and its implementation. Besides the ORIC, it contained the  
39  
40 169 Control Preference Scale [53] and the IcanSDM [54], demographic questions (e.g. gender, age, profession,  
41  
42 170 work experience) as well as several questions that have been used in previous studies in cancer care [55].  
43  
44 171 Results of these additional measures will be published as part of the primary evaluation of the SDM  
45  
46 172 implementation study [52].  
47  
48 173 Participants were part of a convenience sample of physicians and nurses. Since this is a secondary  
49  
50 174 analysis, inclusion criteria were identical to inclusion criteria of the SDM implementation study [52]. We  
51  
52 175 included physicians and nurses who worked at one of three departments within the University Cancer  
53  
54 176 Center Hamburg at the University Medical Center Hamburg-Eppendorf during baseline evaluation of the  
55  
56 177 SDM implementation study [52]. Eligible HCPs were identified through employee lists provided by  
57  
58 178 department managers. The measure was handed out to eligible HCPs either (1) by a member of our study  
59  
60

1  
2  
3 179 team (e.g. during a regular physician meeting), (2) by the supervising nurses, or (3) via employees'  
4  
5 180 mailboxes. Participants returned the questionnaire personally to a study team member or by mail.

6  
7 181 Data were entered into SPSS (IBM SPSS Statistics, Version 23) including blinded double entry of 20% of  
8  
9 182 the data for quality control.

10  
11 183 **Patient and public involvement.** The measure ORIC preliminary addresses HCPs, therefore physicians,  
12  
13 184 nurses and psychooncologists were involved in the adaptation of the measure by taking part in cognitive  
14  
15 185 interviews. Patients were not involved in this study.

16  
17 186 **Data Analyses.** Descriptive statistics were calculated for demographic characteristics. Cases were  
18  
19 187 excluded if more than 30% of the ORIC items were missing [56]. For all other cases, missing data were  
20  
21 188 replaced with item means. We evaluated the completion rate and therefore the acceptance of the measure  
22  
23 189 by calculating frequencies of missing data per item as well as for the overall measure. For this analysis, we  
24  
25 190 also included cases with more than 30% of ORIC items missing because these values are part of  
26  
27 191 completion rate and relevant for interpretation of acceptance.

28  
29 192 We a priori hypothesized to replicate the theory-based two-dimensional structure of the original English  
30  
31 193 ORIC version. Two correlating factors "change commitment" (item 1 to 5) and "change efficacy" (item 6 to  
32  
33 194 10) were postulated. Kaiser-Meyer-Olkin (KMO) measure of sampling adequacy and the Bartlett's test of  
34  
35 195 sphericity were performed to test prerequisites for factor analysis [57,58]. A confirmatory factor analysis  
36  
37 196 (CFA) with Maximum Likelihood Estimates and two factors was applied for the whole data set as a first  
38  
39 197 step. Because the two-factor model could not be confirmed, we decided to calculate an exploratory factor  
40  
41 198 analysis (EFA) and afterwards an additional CFA to check for model fit. It is recommended to not calculate  
42  
43 199 EFA and CFA with the same data set so the data set was randomized by AL and split into two subsets  
44  
45 200 [59,60]. The first 115 randomized cases including all data of participants were added to EFA, the second  
46  
47 201 115 cases were added to CFA. An EFA with oblique rotation was calculated for the first subset. The non-  
48  
49 202 orthogonal rotation was chosen according to Weiner et al. [40]. In their theory, organizational readiness for  
50  
51 203 change consists of two interrelated dimensions, therefore the two factors are expected to be correlated.  
52  
53 204 Analogue to analyses done by authors of the English ORIC [43,61], we extracted components based on  
54  
55 205 parallel analysis. The criterion of parallel analysis was shown to be superior to other statistic criteria like  
56  
57 206 the Kaiser criterion [62,63]. It compares the eigenvalues of the data to the eigenvalues based on random  
58  
59 207 data with equivalent sample size and number of variables and chooses only factors with eigenvalues higher  
60  
208 than for random data [61,62]. A CFA was calculated for the second subset. A range of global goodness of

209 fit indices were used to assess the degree to which observed data were accounted for by the proposed  
 210 models: discrepancy chi-squared statistic ( $\chi^2$ ), degree of freedom (df), normed chi-squared statistic  
 211 ( $\chi^2/\text{df}$ ), Comparative Fit Index (CFI), Tucker-Lewis Index (TLI), Root Mean Square Error of Approximation  
 212 (RMSEA) as well as Akaike Information Criterion (AIC) and Parsimonious Normed Fit Index (PNFI) for  
 213 analysing model complexity. Established rules to estimate the model fit were used [64–67].

214 Item analyses was performed for the one-factor model. It included calculation of item means and standard  
 215 deviation as well as observation of floor and ceiling effects [68], calculation of corrected item-total  
 216 correlations [57,69], inter-item correlations [57,69], and item difficulties [58]. Internal consistency of the  
 217 scale was assessed by Cronbach's alpha coefficient ( $\alpha$ ) [58,69,70]. For a detailed overview on performed  
 218 data analyses, see Table 1.

219 During the translation process and cognitive interviews we found low content validity for item 10 (see results  
 220 section), therefore the use of item 10 for the German ORIC needs to be evaluated. Accordingly, we also  
 221 conducted psychometric analyses (EFA with oblique rotation and extraction of components based on  
 222 parallel analysis, corrected item-total correlations, Cronbach's  $\alpha$ , and goodness of fit indexes) for the 9-item  
 223 version of the ORIC.

224 Analysis of demographic data, analysis of completion rate, item analysis and EFA were performed using  
 225 SPSS (IBM SPSS Statistics, Version 23). CFA and calculation of model fit indices were performed using  
 226 Amos (IBM SPSS Amos 22.0.0).

227

228 Table 1: Psychometric analyses conducted.

| Psychometric measure                                                                    | Criteria                                                                                                                                                                                                                                                              |
|-----------------------------------------------------------------------------------------|-----------------------------------------------------------------------------------------------------------------------------------------------------------------------------------------------------------------------------------------------------------------------|
| Kaiser-Meyer-Olkin (KMO) measure of sampling adequacy and Bartlett's test of sphericity | These tests ensure that correlations between variables can be accounted for by a smaller set of factors [57]. KMO value should be higher than .05 and Bartlett's test value should be less than .05 to fulfil the criteria for calculating a factor analysis [57,58]. |
| Normed chi-squared statistic ( $\chi^2/\text{df}$ )                                     | $\chi^2/\text{df}$ is an indicator for model fit, dependent on sample size and should be as small as possible. A ratio between 2 and 3 indicate a good data fit [64].                                                                                                 |
| Comparative fit indexes (CFI)                                                           | CFIs is an indicator for model fit. It ranges from 0 to 1 and higher values indicate better fit. Values above .95 indicate a good model fit [67,71].                                                                                                                  |
| Tucker-Lewis Index (TLI)                                                                | TLI is an indicator for model fit. It corrects for complexity of the model and is sensitive to small sample sizes. Values above .95 indicate good fit [65].                                                                                                           |

|                                                         |                                                                                                                                                                                                                                                    |
|---------------------------------------------------------|----------------------------------------------------------------------------------------------------------------------------------------------------------------------------------------------------------------------------------------------------|
| Root mean square error of approximation (RMSEA)         | RMSEA is an absolute index which describes closeness to fit. Values below .05 indicate a good fit, values between .05 and .08 indicate an adequate fit, values between .08 and 1 indicate a moderate fit and values above 1 are unacceptable [72]. |
| Akaike Information Criterion (AIC)                      | AIC is a parsimony model fit index. It can be used to compare fit of competing models with smaller values indicating better fit [64,67].                                                                                                           |
| Parsimonious Normed Fit Index (PNFI)                    | PNFI is a parsimony model fit index. It ranges between 0 and 1 and higher values indicate a more parsimonious fit [64]. No threshold levels are recommended and it has to be analysed in combination with other goodness of fit indices [67].      |
| Analysis of frequencies for item response distributions | Floor and ceiling effects were assumed present if more than 15% of participants choose the lowest or highest possible score [68].                                                                                                                  |
| Corrected item-total correlations                       | If items correlate with the total score of above .30, they measure the same underlying concept. Items with lower correlations should be removed because they do not add exploratory power to the measure [57,69].                                  |
| Item difficulties                                       | Item difficulties are calculated by dividing item means by the maximal value of the answer range (0-4) and multiplying it with 100. Item difficulty should be near to 50%, and items should not differ much in their difficulty level [58].        |
| Inter-item correlations                                 | Inter-item correlations ensure association between items. High inter-item correlations of above .80 indicate that items ask the same questions and might be redundant [57,69].                                                                     |
| Cronbach's $\alpha$                                     | Cronbach's $\alpha$ is a measure for reliability and internal consistency. A value of at least .70 is acceptable and higher coefficients indicate a more stable measure [57,58,70].                                                                |

229

230

231 **RESULTS**232 **Translation**

233 Both translators (AL and SZ) and the reviewer (IS) did not differ much in their translations of items 2 to 5  
 234 and items 8. Greater translation differences were found for items 1, 6, 7, 9, and 10, mainly related to  
 235 differences in sentence structure or single words. Within the first round of team discussion, we reached  
 236 consensus for items 2 to 9, the translation of the response scale and the survey introduction. For item 1 we  
 237 suggested two versions to be further tested in subsequent cognitive interviews. We struggled to translate  
 238 the phrase "manage the politics" in item 10 into German. Therefore, we discussed item 10 with additional  
 239 colleagues (cp. methods section) until consensus was found.

240

241 **Assessment of comprehensibility as part of content validity and subsequent adaptation of the scale**

1  
2  
3 242 To test the German ORIC for comprehensibility, cognitive interviews with n=11 participants (nurses,  
4  
5 243 physicians, and psychooncologists) were conducted. Cognitive interviews lasted about one hour. For  
6  
7 244 demographic data of participants see Table A in Supplementary File 1.

8  
9 245 After the first round of cognitive interviews (n=7), no changes have to be made to the response scale as  
10  
11 246 well as for item 2 to 5 and 8 because these items were already well understood by participants. Participants  
12  
13 247 made some minor suggestions for modifications for the introductory description and items 1 and 6.  
14  
15 248 Additionally, some participants did not understand the correct meaning of items 7, 9 and 10 in general or  
16  
17 249 of single words or phrases of these items. After discussions and modifications of these items, we tested  
18  
19 250 alternative versions of the survey introduction, for items 1, 6, 9 and 10 as well as two alternative versions  
20  
21 251 of item 7. After the second round of cognitive interviews (n=4), items 1, 6 and 9 were now understood well  
22  
23 252 by all participants. We had to slightly modify the survey introduction again and decided to use the version  
24  
25 253 of item 7 which was understood best. After all, item 10 could not be translated successfully. Both rounds of  
26  
27 254 cognitive interviews showed that comprehension of the German translation of the phrase “manage the  
28  
29 255 politics” did not picture the correct English meaning. So in a next step we consulted with DF (cp. list of  
30  
31 256 abbreviations) and reached consensus on a final version. Nevertheless, the final version of item 10 was  
32  
33 257 still not satisfying from the study team and experts view. Item 10 was found to have low comprehensibility  
34  
35 258 as part of content validity according to COSMIN criteria [50]. The final German ORIC measure, used in this  
36  
37 259 study, is presented in Supplementary File 2.

38 260 During cognitive interviews some nurses reported that they had not heard about the term “shared decision-  
39  
40 261 making” (German: “Partizipative Entscheidungsfindung”) prior to participation. Thus, we provided a  
41  
42 262 definition of SDM in the introduction part of the questionnaire within the SDM implementation study [52].

43 263

#### 45 264 **Psychometric evaluation**

46  
47 265 **Sample characteristics.** Data of 235 HCPs were available for this secondary analysis. In line with  
48  
49 266 recommendations of Bannon [56], five cases (0.02% of all cases) were excluded (except for assessment  
50  
51 267 of completion rate), because all items of the ORIC were missing. Missing values were replaced by means  
52  
53 268 and data of 230 HCPs could be included into analyses.

54  
55 269 Table 2 provides an overview of participants’ demographic characteristics. Most of the 230 HCPs were  
56  
57 270 between 31 and 40 years old (37.0%), female (70.4%), worked as a nurse (57.0%), and had a work  
58  
59 271 experience of < 5 years (43.9%).

272

273 Table 2: Demographic characteristics of participants (n=230).

|                               |                                                           | N   | %    |
|-------------------------------|-----------------------------------------------------------|-----|------|
| Age                           | < 30 years                                                | 72  | 31.3 |
|                               | 31-40 years                                               | 85  | 37.0 |
|                               | 41-50 years                                               | 42  | 18.3 |
|                               | > 50 years                                                | 26  | 11.3 |
|                               | Missings                                                  | 5   | 2.2  |
| Gender                        | Female                                                    | 162 | 70.4 |
|                               | Male                                                      | 59  | 25.7 |
|                               | Different gender or preferred not to answer this question | 5   | 2.1  |
|                               | Missings                                                  | 4   | 1.7  |
| Profession                    | Nurse                                                     | 131 | 57.0 |
|                               | Junior physician                                          | 69  | 30.0 |
|                               | Senior physician                                          | 27  | 11.7 |
|                               | Missings                                                  | 3   | 1.3  |
| Work experience in healthcare | < 5 years                                                 | 101 | 43.9 |
|                               | 5-10 years                                                | 48  | 20.9 |
|                               | 11-20 years                                               | 46  | 20.0 |
|                               | > 20 years                                                | 28  | 12.2 |
|                               | Missings                                                  | 7   | 3.0  |

274

275

276 **Factor analysis.** Sample size was large enough (>100) to allow factor analysis [50], even for a split data  
 277 set with n=115. Furthermore, there were no outliers and values were approximately normally distributed.  
 278 KMO measure was .933 and Barlett's test of sphericity yielded  $X^2 = 1485.11$ ,  $p < .001$ . This indicates that  
 279 a factor analysis of the data was appropriate [57,58]. CFA for the hypothesised two-factor model showed a  
 280 high correlation of .87 between the two components (see Supplementary File 3). Therefore, we postulated  
 281 a one-factorial structure and conducted a post-hoc EFA. As shown in Table 3, only the first component had  
 282 an eigenvalue higher than 95% percentile of the eigenvalues of corresponding random data and the main  
 283 component explains 67.23% of the variance. Thus, according to parallel analysis, a one-factor model was  
 284 assumed. The factor loadings for the first component were above 0.754 for all items (see Table B of  
 285 Supplementary File 1).

286

287 Table 3: Results of EFA with oblique rotation and parallel analysis: eigenvalues of the ten components of  
 288 the German ORIC and eigenvalues for corresponding random data.

|             | Eigenvalues |               |              | Eigenvalues for random data |                |
|-------------|-------------|---------------|--------------|-----------------------------|----------------|
|             | Total       | % of variance | Cumulative % | Means                       | 95% percentile |
| Component 1 | 6.72        | 67.23         | 67.23        | 1.49                        | 1.65           |
| Component 2 | 0.83        | 8.30          | 75.53        | 1.33                        | 1.44           |
| Component 3 | 0.47        | 4.75          | 80.28        | 1.21                        | 1.30           |
| Component 4 | 0.41        | 4.08          | 84.36        | 1.11                        | 1.19           |



|              |      |      |        |      |      |
|--------------|------|------|--------|------|------|
| Component 5  | 0.39 | 3.91 | 88.28  | 1.02 | 1.08 |
| Component 6  | 0.32 | 3.24 | 91.52  | 0.93 | 1.00 |
| Component 7  | 0.27 | 2.74 | 94.26  | 0.85 | 0.92 |
| Component 8  | 0.23 | 2.34 | 96.60  | 0.77 | 0.84 |
| Component 9  | 0.17 | 1.74 | 98.35  | 0.68 | 0.75 |
| Component 10 | 0.16 | 1.65 | 100.00 | 0.58 | 0.66 |

Notes: For EFA, half of the data set (n=115) was used.

289  
290 A second CFA was performed with the one-factor model to analyse its fit indices. Indices of the two-factor  
291 model and the one-factor model are compared in Table 4.

292

293 Table 4: Fit indices of two calculated models for factor analysis of the German ORIC.

|                  | Chi <sup>2</sup> <sup>1</sup> | df <sup>2</sup> | Chi <sup>2</sup> /df <sup>3</sup> | CFI <sup>4</sup> | TLI <sup>5</sup> | RMSEA <sup>6</sup> | AIC <sup>7</sup> | PNFI <sup>8</sup> |
|------------------|-------------------------------|-----------------|-----------------------------------|------------------|------------------|--------------------|------------------|-------------------|
| Two-factor model | 81.71*                        | 34              | 2.40                              | .968             | .947             | .078               | 143.71           | .585              |
| One-factor model | 77.19*                        | 35              | 2.20                              | .928             | .907             | .103               | 117.19           | .682              |

Notes: Two-factor model was calculated for the whole data set (n=230): factor 1 includes item 1 to 5, factor 2 includes item 6 to 10; One-factor model was calculated for half of the data set (n=115): includes items 1 to 10.

<sup>1</sup> discrepancy chi-squared statistic, <sup>2</sup> degrees of freedom, <sup>3</sup> normed chi-squared statistic, <sup>4</sup> comparative fit indexes, <sup>5</sup> Tucker-Lewis Index, <sup>6</sup> root mean square error of approximation, <sup>7</sup> Akaike Information Criterion, <sup>8</sup> Parsimonious Normed Fit Index (PNFI). \*  $p = .000$

294  
295  
296 Results of factor analysis for the 9-item version of the ORIC (without item 10) were similar. Also for the 9-  
297 item version, a one-factor model was assumed by exploratory factor analysis. Only the first component had  
298 an eigenvalue higher than 95% percentile of the eigenvalues of corresponding random data and the main  
299 component explains 66.85% of the variance. Factor loadings of the first component are above 0.739 for all  
300 items (see Supplementary File 4, Table A and B). Goodness of fit indices of the one-factor model of the 9-  
301 item ORIC version showed similar values compared to the 10-item ORIC version (see Supplementary File  
302 4, Table C).

303  
304 **Analysis of the ORIC items and internal consistency.** Table 5 shows response distribution, means,  
305 standard deviations, acceptance, corrected item-total correlation, and item difficulty of the ten items. Means  
306 ranged between 2.24 (item 9) and 2.61 (item 5). Most participants responded in the middle of the scale with  
307 a slight shift to more agreement. For items 1 to 9 between four and six missing values could be detected.  
308 For item 10, nine missing values were found. Taking all items into account, more than 97% of the measure  
309 were answered. Corrected item-total correlations ranged from .665 (item 9) to .774 (item 3), item difficulties

1  
2  
3 310 from 55.98 (item 9) to 65.32 (item 5), and inter-item correlations from .434 (item2/item9) to .723 (item3/item  
4  
5 311 5) (see Table C of Supplementary File 1). Internal consistency yielded a Cronbach's  $\alpha$  of .93.  
6  
7 312 Additionally, corrected item-total correlations and internal consistency were calculated for the 9-item ORIC  
8  
9 313 version (see Supplementary File 4, Table D). They were similar to the results for the 10-item version with  
10  
11 314 corrected item-total correlations between .638 (item 9) and .777 (item 3) and a Cronbach's  $\alpha$  of .92.  
12  
13 315  
14  
15 316  
16  
17  
18  
19  
20  
21  
22  
23  
24  
25  
26  
27  
28  
29  
30  
31  
32  
33  
34  
35  
36  
37  
38  
39  
40  
41  
42  
43  
44  
45  
46  
47  
48  
49  
50  
51  
52  
53  
54  
55  
56  
57  
58  
59  
60

For peer review only

317 Table 5: Response distribution, means, standard deviation, acceptance, discrimination and item difficulty of the German ORIC.

| Items                                                                                                                              | Disagree<br>N (%) | Somewhat<br>Disagree<br>N (%) | Neither<br>Agree nor<br>Disagree<br>N (%) | Somewhat<br>Agree<br>N (%) | Agree<br>N (%) | Mean (SD)   | Acceptance<br>(Comple-<br>tion rate in<br>%)* | Item<br>discrimination<br>(corrected<br>item-total<br>correlation) | Item<br>difficulty |
|------------------------------------------------------------------------------------------------------------------------------------|-------------------|-------------------------------|-------------------------------------------|----------------------------|----------------|-------------|-----------------------------------------------|--------------------------------------------------------------------|--------------------|
| 1 People who work here are committed to implementing shared decision-making.                                                       | 1 (0.4)           | 22 (9.6)                      | 109 (47.0)                                | 73 (30.9)                  | 25 (10.9)      | 2.42 (.826) | 97.43                                         | .744                                                               | 60.58              |
| 2 People who work here will do whatever it takes to implement shared decision-making.                                              | 4 (1.7)           | 37 (16.1)                     | 103 (44.8)                                | 68 (29.6)                  | 18 (7.4)       | 2.25 (.878) | 98.29                                         | .689                                                               | 56.36              |
| 3 People who work here want to implement shared decision-making.                                                                   | 0 (0.0)           | 15 (6.5)                      | 107 (46.5)                                | 84 (35.7)                  | 24 (10.4)      | 2.50 (.768) | 97.43                                         | .774                                                               | 62.61              |
| 4 People who work here are determined to implement shared decision-making.                                                         | 2 (9.0)           | 38 (16.5)                     | 107 (46.5)                                | 67 (29.1)                  | 16 (7.0)       | 2.25 (.843) | 98.29                                         | .758                                                               | 56.19              |
| 5 People who work here are motivated to implement shared decision-making.                                                          | 1 (0.4)           | 16 (7.0)                      | 85 (37.0)                                 | 97 (42.2)                  | 31 (13.5)      | 2.61 (.821) | 98.29                                         | .764                                                               | 65.32              |
| 6 People who work here feel confident that they can handle the challenges that might arise in implementing shared decision-making. | 2 (0.9)           | 20 (8.7)                      | 93 (40.4)                                 | 93 (40.4)                  | 22 (9.6)       | 2.49 (.819) | 98.29                                         | .760                                                               | 62.28              |
| 7 People who work here feel confident that they can keep track of progress in implementing shared decision-making.                 | 1 (0.4)           | 26 (11.3)                     | 93 (40.4)                                 | 92 (40.0)                  | 18 (7.8)       | 2.43 (.811) | 98.29                                         | .725                                                               | 60.87              |
| 8 People who work here feel confident that they can coordinate tasks so that implementation goes smoothly.                         | 5 (2.2)           | 24 (10.4)                     | 107 (46.5)                                | 78 (33.5)                  | 16 (6.5)       | 2.32 (.833) | 99.56                                         | .697                                                               | 58.13              |
| 9 People who work here feel confident that the organization can support people as they adjust to shared decision-making.           | 6 (2.6)           | 43 (18.7)                     | 89 (38.7)                                 | 74 (32.2)                  | 18 (7.8)       | 2.24 (.934) | 97.86                                         | .665                                                               | 55.98              |
| 10 People who work here feel confident that they can manage the politics of implementing shared decision-making.                   | 3 (1.3)           | 24 (10.04)                    | 122 (50.9)                                | 65 (28.3)                  | 16 (7.0)       | 2.29 (.796) | 96.15                                         | .714                                                               | 57.44              |

Notes: Items could be answered on a 5-step Likert scale rating from 0 „disagree“ to 4 „agree“. SD = standard deviation. \* For calculation of completion rate, five additional cases were included because these participants only skipped the ORIC but filled out the rest of the survey.

318

## 319 **DISCUSSION**

320 The original English ORIC measure is a brief measure with good psychometric properties [43], which were  
321 confirmed in Danish [45] and French [46] validation studies. The study at hand aimed to translate the ORIC  
322 into German and assess its psychometric properties.

### 323 324 **Translation and assessment of comprehensibility as part of content validity**

325 Items 1 to 9 could be translated and adapted successfully after two rounds of cognitive interviews and  
326 several rounds of discussions within the study team and with external experts. The translation team quickly  
327 reached consensus for items 2 to 5 and 8. These items were also well understood by all participants within  
328 the first round of cognitive interviews. For items 1, 6, 7 and 9, the translation process was more complex  
329 and several adaptations and discussions were necessary. Feedback by participants, members of the study  
330 team, and external experts as well as completion rates suggest that comprehensibility of item 10 seems to  
331 be low [50]. This might be due to the translation of the phrase “manage the politics” into “Machenschaften”.  
332 The term “manage the politics” seems to have a strong cultural connotation and no equivalent phrase in  
333 German language exists. The German term “Machenschaften” might have a different connotation as the  
334 English phrase and might lead to skipping the item. Ruest et al. [46], who translated the English ORIC into  
335 French, also identified several differences in cultural concepts during their adaptation process, but could  
336 translate all items successfully. They concluded that limitations in linguistic validation could decrease  
337 comparability of psychometric results of the translated measure. However, item 10 showed similar and  
338 inconspicuous item characteristics compared to other items in our sample. When repeating factor and item  
339 analyses for the 9-item ORIC version including only item 1 to 9, very similar results were observed  
340 compared to the 10-item version. To increase comprehensibility and thereby content validity of the scale,  
341 the use of the 9-item German ORIC might be a solution and should be evaluated in future studies.

### 342 343 **Factor analysis**

344 We a priori hypothesized a two-factorial structure of the German ORIC, because Shea et al. [43] described  
345 correlations between the two theory-based factors “change commitment” and “change efficacy” of .56 to  
346 .60. However, we found much higher factor correlations of 0.87. Results of the subsequent EFA clearly  
347 indicated a one-factorial structure. Thus, we could not confirm the two-factor structure of the English and  
348 the translated Danish and French versions of ORIC [43,45,46]. When comparing the two models, both

1  
2  
3 349 models have acceptable values for  $\chi^2/df$  [64] and CFI [67,71], but only the two-factor model has  
4  
5 350 acceptable values for TLI [65] and RMSEA [72]. When involving parsimony of the models by calculating  
6  
7 351 AIC and PNFI, the one-factor model fits better to the data [64,67]. Therefore, we prefer the more  
8  
9 352 parsimonious one-factor model. These differences to previous validation studies might be a consequence  
10  
11 353 of diverse cultural connotations of the ORIC items in different languages, caused by the adaption to the  
12  
13 354 context of SDM, or due to specific characteristics of the participating clinics.  
14  
15 355

### 16 356 **Analysis of ORIC items and internal consistency**

17  
18 357 Since the ORIC was presented as the last measure in a three-page survey, missing values might indicate  
19  
20 358 respondent fatigue. However, missing value rates for single items and the overall measure were quite low  
21  
22 359 and the German ORIC was found to be a well-accepted measure. There were no floor or ceiling effects.  
23  
24 360 Corrected item-total correlations of above .66 indicate that all items measure the same underlying concept  
25  
26 361 [57,69]. Criteria for good item difficulties are met since item difficulties are near to 50% and do not differ  
27  
28 362 much from each other [58]. Inter-item correlations are below .80, indicating that items add additional  
29  
30 363 information and are not redundant [57,69]. Cronbach's  $\alpha$  ( $\alpha=.93$ ) suggest excellent internal consistency  
31  
32 364 [57,58,70]. In summary, item analysis and internal consistency of the German ORIC suggest good quality  
33  
34 365 of the measure.

35  
36 366 Nevertheless, according to Streiner and Norman [58] a Cronbach's  $\alpha$  above .90 might also indicate item  
37  
38 367 redundancy. On the other hand, inter-item correlations and corrected item-total correlations are in an  
39  
40 368 acceptable range [57,69]. In implementation research there is a need for preferably brief measures, which  
41  
42 369 can be applied in diverse settings with high work-load. Thus, future research could investigate the possibility  
43  
44 370 to further reduce the number of items.

45 371

### 46 47 372 **Strength and Limitations**

48  
49 373 This study has some limitations. First, several psychometric parameters are not analysable because this  
50  
51 374 study was a secondary analysis of cross-sectional data. It was not possible to calculate e.g. convergent or  
52  
53 375 divergent validity yet. Second, we applied the ORIC only in three departments of one University Medical  
54  
55 376 Center in Germany. Further validation in different organizational settings is needed to ensure  
56  
57 377 generalizability. Third, for this psychometric evaluation we used a German ORIC, which we adapted and  
58  
59 378 specified for the context of SDM implementation. Our results might not be generalizable for other  
60

1  
2  
3 379 interventions in other organizations. Fourth, although SDM was not implemented to the participating clinics  
4  
5 380 before, there might be participants who were more familiar with the concept of SDM than others. Fifth, item  
6  
7 381 10 was again slightly changed after finishing cognitive interviews. This item was not finally tested for  
8  
9 382 comprehensibility.

10  
11 383 A major strength of this study is that we provided the first measure to assess organizational readiness for  
12  
13 384 change in German language for use in implementation studies. We conducted an elaborated translation  
14  
15 385 procedure, which was recommended for survey translations. We furthermore used a qualitative approach  
16  
17 386 to explore comprehensibility including discussions with international colleagues and experts outside of the  
18  
19 387 study team. Furthermore, we assessed the ORIC in a sample including physicians and nurses which was  
20  
21 388 large enough to robustly perform the psychometric analysis on the German version of the ORIC measure.

22 389

## 23 24 390 **CONCLUSION**

25  
26 391 Organizational readiness is a crucial indicator to successfully implement change and a possible barrier if  
27  
28 392 missing. For implementation studies, it is essential to measure organizational readiness with valid and  
29  
30 393 reliable measures. We provide the first German measure for organizational readiness for implementing  
31  
32 394 change and validated it for the context of SDM implementation. The German ORIC is a brief measure with  
33  
34 395 a high completion rate. We found satisfying psychometric properties in a German hospital setting. To  
35  
36 396 increase content validity of the measure, the use of a 9-item German ORIC (without item 10) should be  
37  
38 397 evaluated in future studies. As the ORIC targets the attitude of organizational members, it can detect  
39  
40 398 reduced or missing readiness for implementing a change on the individuals' level. Therefore, the German  
41  
42 399 ORIC can be used to analyse organizational readiness as a possible barrier for implementing various  
43  
44 400 interventions in organizations.

45 401

## 46 47 402 **LIST OF ABBREVIATIONS**

48  
49 403 AH: Anne Haugstvedt

50  
51 404 AIC: Akaike Information Criterion

52  
53 405 AL: Anja Lindig

54  
55 406 AMOS: Analysis of Moment Structure, Statistical Package for the Social Sciences, International Business  
56  
57 407 Machines Corporation

58  
59 408  $\chi^2$  : Discrepancy chi-squared statistic

60

- 1  
2  
3 409 Chi<sup>2</sup>/df: Normed chi-squared statistic  
4  
5 410 CFI: Confirmatory fit index  
6  
7 411 CS: Christopher M. Shea  
8  
9 412 Df: Degree of freedom  
10  
11 413 DF: Dominick Frosch  
12  
13 414 EC: Eva Christalle  
14  
15 415 HCP: Healthcare professional  
16  
17 416 IS: Isabelle Scholl  
18  
19 417 KMO: Kaiser-Meyer-Olkin criterion  
20  
21 418 MM: Marcel Machalski  
22  
23 419 MR: Mélanie Ruest  
24  
25 420 ORIC: Organizational Readiness for Implementing Change  
26  
27 421 PH: Pola Hahlweg  
28  
29 422 PNFI: Parsimonious Normed Fit Index  
30  
31 423 RMSEA: Root mean square error of approximation  
32  
33 424 SDM: Shared decision-making  
34  
35 425 SPSS: Statistical Package for the Social Sciences, International Business Machines Corporation  
36  
37 426 SZ: Stefan Zeh  
38  
39 427 TLI: Tucker-Lewis Index  
40  
41 428 TRAPD: Translation, Review, Adjudication, Pretesting, Documentation  
42

## 430 **DECLARATIONS**

### 431 **Ethics approval and consent to participate**

432 The study was approved by the Ethics Committee of the Medical Association Hamburg (Germany, study  
433 ID PV5368). The study was carried out in accordance to the latest version of the Helsinki Declaration of the  
434 World Medical Association. Principles of good clinical practice were respected. Data protection  
435 requirements were met. Study participation was voluntary. A waiver of consent for HCPs was obtained from  
436 the Ethics Committee, as proposed by current statements on ethical designs of implementation research  
437 [73]. HCPs were able to decline participation in the study.

438  
59  
60

1  
2  
3 439 **Funding**

4  
5 440 This study is funded by the German Research Foundation (Deutsche Forschungsgemeinschaft, grant  
6  
7 441 number 232160533).

8  
9 442  
10  
11 443 **Competing interests**  
12  
13 444 PH gave one scientific presentation on shared decision-making during a lunch symposium, for which she  
14  
15 445 received compensation and travel compensation from GlaxoSmithKline GmbH in 2018. AL, EC and IS  
16  
17 446 declared to not have any competing interests.

18 447  
19  
20 448 **Author contributions**  
21  
22 449 AL, PH and IS made substantial contributions to the design and preparation of the study. AL and PH  
23  
24 450 collected the data. AL conducted the analysis in collaboration with EC. All authors contributed to the  
25  
26 451 interpretation of results. AL drafted the manuscript and PH, IS and EC were involved in critically revising  
27  
28 452 the manuscript for important intellectual content. All authors gave final approval of the version to be  
29  
30 453 published.

31 454  
32  
33 455 **Checklist for reporting statement**  
34  
35 456 To report the results of this validation study, we used the Authors' Guidelines for Reporting Scale  
36  
37 457 Development and Validation Results by Cabrera-Nguyen.

38  
39 458  
40  
41 459 **Patient consent form**  
42  
43 460 Not applicable

44  
45 461  
46  
47 462 **Data sharing statement**  
48  
49 463 The dataset collected and analyzed during this study is available from the corresponding author on  
50  
51 464 reasonable request.

52 465  
53  
54 466 **Acknowledgements**  
55  
56 467 We thank our student assistants Anastasia Izotova, Sophia Schulte and Nicolai Pergande for their help  
57  
58 468 preparing the study and the analysis. We thank Stefan Zeh for his part the team translation process. We  
59  
60



1  
2  
3 469 thank Dominick Frosch, Anne Haugstvedt, Marcel Machalski, Mélanie Ruest and Christopher M. Shea for  
4  
5 470 helpful comments and suggestions in the translation and adaptation process of item 10. We also would like  
6  
7 471 to thank Christopher M. Shea for giving the opportunity to translate the ORIC into German and to use it in  
8  
9 472 our implementation study.

10  
11 473  
12  
13 474 **Supplementary Files**  
14  
15 475 Supplementary File 1: Additional tables for psychometric evaluation of the 10-item ORIC version  
16  
17 476 Supplementary File 2: Organizational Readiness for Implementing Change (ORIC) – German version  
18  
19 477 Supplementary File 3: Confirmatory factor analysis model of the 10-item German ORIC  
20  
21 478 Supplementary File 4: Results of psychometric evaluation of the 9-item German ORIC version  
22  
23 479 Supplementary File 5: Reporting Checklist: Authors Guidelines for Reporting Scale Development and  
24  
25 480 Validation Results

26 481  
27  
28 482 **REFERENCES**  
29  
30 483 1 Øvretveit J, Andreen-Sachs M, Carlsson J, et al. Implementing organisation and management  
31  
32 484 innovations in Swedish healthcare. *J Health Organ Manag* 2012;26(2):237-57.  
33  
34 485 2 Montgomery A, Doulougeri K, Panagopoulou E. Implementing action research in hospital settings: a  
35  
36 486 systematic review. *J Health Organ Manag* 2015;29:729–49.  
37  
38 487 3 Rye CB, Kimberly JR. The Adoption of Innovations by Provider Organizations in Health Care. *Med Care*  
39  
40 488 *Res Rev* 2007;64:235–78.  
41  
42 489 4 Bazzoli GJ, Dynan L, Burns LR, et al. Two Decades of Organizational Change in Health Care: What  
43  
44 490 Have we Learned? *Med Care Res Rev* 2004;61:247–331.  
45  
46 491 5 Weiner BJ, Amick H, Lee S-YD. Conceptualization and measurement of organizational readiness for  
47  
48 492 change: a review of the literature in health services research and other fields. *Med Care Res Rev*  
49  
50 493 2008;65:379–436.  
51  
52 494 6 Batras D, Duff C, Smith BJ. Organizational change theory: Implications for health promotion practice  
53  
54 495 *Health Promot Int* 2016;31(1):231–41.  
55  
56 496 7 Yazdani A, Wells R. Barriers for implementation of successful change to prevent musculoskeletal  
57  
58 497 disorders and how to systematically address them. *Appl Ergon* 2018;73:122–40.  
59  
60 498 8 Schelvis RMC, Wiezer NM, Blatter BM, et al. Evaluating the implementation process of a participatory

- 1  
2  
3 499 organizational level occupational health intervention in schools. *BMC Public Health* 2016;16(1):1212.  
4  
5 500 9 Scott DAH, Grant SM. A meta-ethnography of the facilitators and barriers to successful implementation  
6  
7 501 of patient complaints processes in health-care settings. *Heal Expect* 2018;21:508–17.  
8  
9 502 10 Williams B, Perillo S, Brown T. What are the factors of organisational culture in health care settings  
10  
11 503 that act as barriers to the implementation of evidence-based practice? A scoping review. *Nurse Educ*  
12  
13 504 *Today* 2015;35(2):e34–41.  
14  
15 505 11 Härter M, Dirmaier J, Scholl I, et al. The long way of implementing patient-centered care and shared  
16  
17 506 decision making in Germany. *Z Evid Fortbild Qual Gesundheitswes* 2017;123–124:46–51.  
18  
19 507 12 Bieber C, Loh A, Ringel N, et al. Patientenbeteiligung bei medizinischen Entscheidungen. Manual zur  
20  
21 508 partizipativen Entscheidungsfindung (Shared Decision-Making). Freiburg: Universitätsklinikum Freiburg;  
22  
23 509 2007.  
24  
25 510 13 Härter M, Buchholz A, Nicolai J, et al. Shared decision making and the use of decision aids. *Dtsch*  
26  
27 511 *Arztebl Int* 2015;112:672–9.  
28  
29 512 14 Salzburg Global Seminar. Salzburg statement on shared decision making. *BMJ* 2011;342:1745.  
30  
31 513 15 Reuter K, Loh A, Härter M. Patient as partner in oncology - Opportunities for shared decision-making.  
32  
33 514 In: Koch U, Weis J, eds. Psychoonkologie - Eine Disziplin in der Entwicklung. Göttingen: Hogrefe;  
34  
35 515 2009:131–45.  
36  
37 516 16 Hahlweg P, Kriston L, Scholl I, Bet al. Cancer patients' preferred and perceived level of involvement in  
38  
39 517 treatment decision-making. [submitted]  
40  
41 518 17 Hauser K, Koerfer A, Kuhr K, et al. Outcome-relevant effects of shared decision making. *Dtsch Arztebl*  
42  
43 519 *Int* 2015;112:665–71.  
44  
45 520 18 Shay LA, Lafata JE. Where is the evidence? A systematic review of shared decision making and  
46  
47 521 patient outcomes. *Med Decis Mak* 2015;35:114–31.  
48  
49 522 19 Härter M, Müller H, Dirmaier J, et al.. Patient participation and shared decision making in Germany -  
50  
51 523 History, agents and current transfer to practice. *Z Evid Fortbild Qual Gesundheitswes* 2011;105:263–70.  
52  
53 524 20 Härter M, Moumjid N, Cornuz J, et al. Shared decision making in 2017: International accomplishments  
54  
55 525 in policy, research and implementation. *Z Evid Fortbild Qual Gesundheitswes* 2017;123–124:1–5.  
56  
57 526 21 Härter M, van der Weijden T, Elwyn G. Policy and practice developments in the implementation of  
58  
59 527 shared decision making: An international perspective. *Z Evid Fortbild Qual Gesundheitswes* 2011;105:229–  
60  
528 33.

- 1  
2  
3 529 22 Fujimori M, Uchitomi Y. Preferences of Cancer Patients Regarding Communication of Bad News: A  
4  
5 530 Systematic Literature Review. *Jpn J Clin Oncol* 2009;39:201–16.  
6  
7 531 23 Ernst J, Brahler E, Weissflog G. Patient involvement in medical decision making--an overview on  
8  
9 532 patient preferences and impacting factors. *Gesundheitswesen* 2014;76:187–92.  
10  
11 533 24 Chewning B, Bylund CL, Shah B, et al Patient preferences for shared decisions: A systematic review.  
12  
13 534 *Patient Educ Couns* 2012;86:9–18.  
14  
15 535 25 Brom L, Hopmans W, Pasman HR, et al. Congruence between patients' preferred and perceived  
16  
17 536 participation in medical decision-making: A review of the literature. *BMC Med Inform Decis Mak*  
18  
19 537 2014;14:25.  
20  
21 538 26 Légaré F, Stacey D, Turcotte S, et al. Interventions for improving the adoption of shared decision  
22  
23 539 making by healthcare professionals. *Cochrane Database Syst Rev* 2014;9:CD006732.  
24  
25 540 27 Légaré F, Witteman HO. Shared decision making: Examining key elements and barriers to adoption  
26  
27 541 into routine clinical practice. *Health Aff* 2013;32:276–84.  
28  
29 542 28 Frosch D, Tietbohl C, Scholl I. Overcoming implementation challenges to advance shared-decision  
30  
31 543 making in routine practice. In: Elwyn G, Thompson R, Edwards A, eds. Shared Decision Making Health  
32  
33 544 Care Achieve Evidence-Based Patient Choice, 3rd Ed. Oxford: Oxford University Press; 2016.  
34  
35 545 29 Grol R, Wensing M, Eccles M, et al. Improving patient care: The implementation of change in health  
36  
37 546 care. Hoboken (NJ): John Wiley & Sons; 2013.  
38  
39 547 30 Grol R, Grimshaw J. From best evidence to best practice: Effective implementation of change in  
40  
41 548 patients' care. *Lancet* 2003;362:1225–30.  
42  
43 549 31 Cummings GG, Estabrooks CA, Midodzi WK, et al. Influence of Organizational Characteristics and  
44  
45 550 Context on Research Utilization. *Nurs Res* 2007;56:S24–39.  
46  
47 551 32 Li S-A, Jeffs L, Barwick M, Stevens B. Organizational contextual features that influence the  
48  
49 552 implementation of evidence-based practices across healthcare settings: a systematic integrative review.  
50  
51 553 *Syst Rev* 2018;7:72.  
52  
53 554 33 Légaré F, Ratté S, Gravel K, et al. Barriers and facilitators to implementing shared decision-making in  
54  
55 555 clinical practice: Update of a systematic review of health professionals' perceptions. *Patient Educ Couns*.  
56  
57 556 2008;73:526–35.  
58  
59 557 34 Frerichs W, Hahlweg P, Müller E, et al. Shared decision-making in oncology – a qualitative analysis of  
60  
558 healthcare providers' views on current practice. *PLoS One* 2016;11:e0149789.

- 1  
2  
3 559 35 Scholl I, LaRussa A, Hahlweg P, et al. Organizational- and system-level characteristics that influence  
4  
5 560 implementation of shared decision-making and strategies to address them - a scoping review. *Implement*  
6  
7 561 *Sci* 2018;13:40.
- 8  
9 562 36 André B, Sjøvold E. What characterizes the work culture at a hospital unit that successfully  
10  
11 563 implements change - a correlation study. *BMC Health Serv Res* 2017;17:486.
- 12  
13 564 37 Armenakis AA, Harris SG, Mossholder KW. Creating Readiness for Organizational Change. *Hum*  
14  
15 565 *Relations* 1993;46:681–703.
- 16  
17 566 38 Kash BA, Spaulding A, Gamm LD, et al. Leadership, culture, and organizational technologies as  
18  
19 567 absorptive capacity for innovation and transformation in the healthcare sector: A framework for research.  
20  
21 568 *Chang Manag. Common Ground Publishing* 2014;13:1–13.
- 22  
23 569 39 Armenakis AA, Harris SG, Mossholder KW. Creating Readiness for Organizational Change. *Hum*  
24  
25 570 *Relations* 1993;46:681–703.
- 26  
27 571 40 Weiner BJ. A theory of organizational readiness for change. *Implement Sci* 2009;4:67.
- 28  
29 572 41 Armenakis AA, Harris SG. Crafting a change message to create transformational readiness. *J Organ*  
30  
31 573 *Chang Manag* 2002;15:169–83.
- 32  
33 574 42 Holt D, Armenakis A, Harris S, et al. Toward a Comprehensive Definition of Readiness for Change: A  
34  
35 575 Review of Research and Instrumentation. *Res Organ Chang Dev* 2007;16:289–336.
- 36  
37 576 43 Shea CM, Jacobs SR, Esserman DA, et al. Organizational readiness for implementing change: A  
38  
39 577 psychometric assessment of a new measure. *Implement Sci* 2014;9:7.
- 40  
41 578 44 Gagnon M-P, Attieh R, Ghandour EK, et al. A Systematic Review of Instruments to Assess  
42  
43 579 Organizational Readiness for Knowledge Translation in Health Care. *PLoS One* 2014;9:e114338.
- 44  
45 580 45 Storkholm MH, Mazzocato P, Tessma MK, et al. Assessing the reliability and validity of the Danish  
46  
47 581 version of Organizational Readiness for Implementing Change (ORIC). *Implement Sci* 2018;13:78.
- 48  
49 582 46 Ruest M, Leonard G, Thomas A, et al. French cross-cultural adaptation of the Organizational  
50  
51 583 Readiness for Implementing Change (ORIC). *BMC Health Serv Res* 2019;19:535.
- 52  
53 584 47 Alexander JA, Hearld LR. Methods and metrics challenges of delivery-system research. *Implement Sci*  
54  
55 585 2012;7:15.
- 56  
57 586 48 Harkness J, Pennell BE, Schoua-Glusberg A. Survey Questionnaire Translation and Assessment. In:  
58  
59 587 Presser S, Rothgeb J, Couper M, et al., eds. *Methods for Testing and Evaluating Survey Questionnaires*.  
60  
588 Hoboken (NJ): JohnWiley & Sons; 2004:453–73.

- 1  
2  
3 589 49 Mokkink LB, Terwee CB, Patrick DL, et al. The COSMIN study reached international consensus on  
4  
5 590 taxonomy, terminology, and definitions of measurement properties for health-related patient-reported  
6  
7 591 outcomes. *J Clin Epidemiol* 2010;63:737–45.
- 8  
9 592 50 Terwee CB, Prinsen CAC, Chiarotto A, et al. COSMIN methodology for evaluating the content validity  
10  
11 593 of patient-reported outcome measures: a Delphi study. *Qual Life Res.* 2018;27:1159–70.
- 12  
13 594 51 Willis GB, Research Triangle Institute. Cognitive interviewing - a “how to” guide. 1999.
- 14  
15 595 52 Scholl I, Hahlweg P, Lindig A, et al. Evaluation of a program for routine implementation of shared  
16  
17 596 decision-making in cancer care : study protocol of a stepped wedge cluster randomized trial. *Implement*  
18  
19 597 *Sci* 2018;1–10.
- 20  
21 598 53 Degner LF, Sloan JA, Venkatesh P. The Control Preferences Scale. *Can J Nurs Res* 1997;29:21–43.
- 22  
23 599 54 Coudert L, Carmichael P-H, Renaud J-S, et al. Validation of the IcanSDM instrument to assess  
24  
25 600 clinicians’ perceptions of their ability to adopt shared decision making [in preparation].
- 26  
27 601 55 Hahlweg P, Härter M, Nestoriuc Y, et al. How are decisions made in cancer care? A qualitative study  
28  
29 602 using participant observation of current practice. *BMJ Open* 2017;7:e016360.
- 30  
31 603 56 Bannon WJ. Missing data within a quantitative research study: How to assess it, treat it, and why you  
32  
33 604 should care. *J Am Assoc Nurse Pr* 2015;27:230–2.
- 34  
35 605 57 Rattray J, Jones MC. Essential elements of questionnaire design and development. *J Clin Nurs*  
36  
37 606 2007;16:234–43.
- 38  
39 607 58 Streiner DL, Norman GR, Health measurement scales: A practical guide to their development and use.  
40  
41 608 Oxford, UK: Oxford University Press 2008.
- 42  
43 609 59 Fabrigar L, Wegener DT, MacCallum RC, et al. Evaluating the use of exploratory factor analysis in  
44  
45 610 psychological research. *Psychol Methods* 1999;4:272.
- 46  
47 611 60 Worthington R. Scale development research. *Couns Psychol* 2006;34:806–38.
- 48  
49 612 61 O’Connor BP. SPSS and SAS programs for determining the number of components using parallel  
50  
51 613 analysis and Velicer’s MAP test. *Behav Res Methods, Instruments, Comput* 2000;23:396–402.
- 52  
53 614 62 Hayton JC, David GA, Scarpello V. Factor Retention Decisions in Exploratory Factor Analysis: a  
54  
55 615 Tutorial on Parallel Analysis. *Organ Res Methods* 2004;7:191–205.
- 56  
57 616 63 Zwick WR, Velicer WF. Comparison of five rules for determining the number of components to retain.  
58  
59 617 *Psychol Bull* 1986;99:432–42.
- 60  
618 64 Schermelleh-Engel K, Moosbrugger H, Müller H. Evaluating the Fit of Structural Equation Models:

- 1  
2  
3 619 Tests of Significance and Descriptive Goodness-of-Fit Measures. *Meth Psychol Res Online* 2003;8:23–  
4  
5 620 74.  
6  
7 621 65 Hu L, Bentler P. Cutoff criteria for fit indexes in covariance structure analysis: conventional criteria  
8  
9 622 versus new alternatives. *Struct Eq Model* 1999;6:1–55.  
10  
11 623 66 Hair J, Black W, Babin B, RE Anderson. Multivariate data analysis. Upper Saddle River, NJ: Pearson  
12  
13 624 Prentice Hall; 2009.  
14  
15 625 67 Hooper D, Coughlan J, Mullen M. Structural Equation Modelling: Guidelines for Determining Model Fit.  
16  
17 626 *Articles* 2008.  
18  
19 627 68 McHorney CA, Tarlov AR. Individual-patient monitoring in clinical practice: are available health status  
20  
21 628 surveys adequate? *Qual Life Res* 1996;4:293–307.  
22  
23 629 69 Ferketich S. Focus on psychometrics. Aspects of item analysis. *Res Nurs Health* 1991;14:165–8.  
24  
25 630 70 Bannigan K, Watson R. Reliability and validity in a nutshell. *J Clin Nurs* 2009;18:3237–43.  
26  
27 631 71 Bentler PM. Comparative fit indexes in structural models. *Psychol Bull* 1990;107:238–46.  
28  
29 632 72 Browne MW, Cudeck R. Single Sample Cross-Validation Indices for Covariance Structures.  
30  
31 633 *Multivariate Behav Res* 1989;24:445–55.  
32  
33 634 73 Hutton J, Eccles M, Grimshaw J. Ethical issues in implementation research: A discussion of the  
34  
35 635 problems in achieving informed consent. *Implement Sci* 2008;3:52.  
36  
37  
38  
39  
40  
41  
42  
43  
44  
45  
46  
47  
48  
49  
50  
51  
52  
53  
54  
55  
56  
57  
58  
59  
60

1  
2  
3 **1 Supplementary File 1: Additional tables for psychometric evaluation of 10-item ORIC version**  
4  
5  
6

2

3 Table A: Demographic data of participants of cognitive interviews (n=11).  
4  
5

|                                   |                  | Frequencies<br>for n=11 |
|-----------------------------------|------------------|-------------------------|
| Age                               | < 30 years       | 1                       |
|                                   | 31-40 years      | 3                       |
|                                   | 41-50 years      | 3                       |
|                                   | > 50 years       | 4                       |
| Gender                            | Female           | 9                       |
|                                   | Male             | 2                       |
| Profession*                       | Nurse            | 8                       |
|                                   | Physician        | 2                       |
|                                   | Psychooncologist | 3                       |
| Work experience in<br>health care | > 5 years        | 3                       |
|                                   | 5-10 years       | 4                       |
|                                   | 11-20 years      | 3                       |
|                                   | > 20 years       | 1                       |

4 \* multiple answers possible  
5  
6

6 Table B: Factor loadings on the first component.  
7  
8

|         | Component 1 |
|---------|-------------|
| Item 1  | 0.790       |
| Item 2  | 0.788       |
| Item 3  | 0.833       |
| Item 4  | 0.846       |
| Item 5  | 0.831       |
| Item 6  | 0.851       |
| Item 7  | 0.839       |
| Item 8  | 0.800       |
| Item 9  | 0.754       |
| Item 10 | 0.860       |

7 For EFA, the sample was split and n=115.  
8  
9

9 Table C: Inter-item correlation matrix for the German ORIC.  
10  
11

|         | Item 1 | Item 2 | Item 3 | Item 4 | Item 5 | Item 6 | Item 7 | Item 8 | Item 9 | Item 10 |
|---------|--------|--------|--------|--------|--------|--------|--------|--------|--------|---------|
| Item 1  | 1.000  | .634   | .650   | .611   | .652   | .587   | .558   | .538   | .507   | .542    |
| Item 2  | .634   | 1.000  | .586   | .681   | .607   | .518   | .504   | .485   | .434   | .478    |
| Item 3  | .650   | .586   | 1.000  | .673   | .723   | .636   | .600   | .558   | .492   | .560    |
| Item 4  | .611   | .681   | .673   | 1.000  | .675   | .588   | .531   | .541   | .512   | .551    |
| Item 5  | .652   | .607   | .723   | .675   | 1.000  | .622   | .621   | .466   | .474   | .578    |
| Item 6  | .587   | .518   | .636   | .588   | .622   | 1.000  | .677   | .590   | .588   | .573    |
| Item 7  | .558   | .504   | .600   | .531   | .621   | .677   | 1.000  | .612   | .491   | .567    |
| Item 8  | .538   | .485   | .558   | .541   | .466   | .590   | .612   | 1.000  | .611   | .560    |
| Item 9  | .507   | .434   | .492   | .512   | .474   | .588   | .491   | .611   | 1.000  | .659    |
| Item 10 | .542   | .478   | .560   | .551   | .578   | .573   | .567   | .560   | .659   | 1.000   |

10  
11  
12  
13  
14  
15  
16  
17  
18  
19  
20  
21  
22  
23  
24  
25  
26  
27  
28  
29  
30  
31  
32  
33  
34  
35  
36  
37  
38  
39  
40  
41  
42  
43  
44  
45  
46  
47  
48  
49  
50  
51  
52  
53  
54  
55  
56  
57  
58  
59  
60

**Supplementary File 2: Organizational Readiness for Implementing Change (ORIC) – German version**

Bitte geben Sie an, wie sehr Sie den folgenden Aussagen zur Umsetzung von partizipativer Entscheidungsfindung an Ihrem aktuellen Arbeitsplatz zustimmen. Falls partizipative Entscheidungsfindung aktuell nicht umgesetzt wird, wie wäre es im Falle der Umsetzung?

|    |                                                                                                                                                                       | stimme nicht zu          | stimme eher nicht zu     | teils teils              | stimme eher zu           | stimme zu                |
|----|-----------------------------------------------------------------------------------------------------------------------------------------------------------------------|--------------------------|--------------------------|--------------------------|--------------------------|--------------------------|
| 1  | Personen, die hier arbeiten, zeigen hohes Engagement bei der Umsetzung von partizipativer Entscheidungsfindung.                                                       | <input type="checkbox"/> |
| 2  | Personen, die hier arbeiten, werden tun, was auch immer nötig ist, um partizipative Entscheidungsfindung umzusetzen.                                                  | <input type="checkbox"/> |
| 3  | Personen, die hier arbeiten, wollen partizipative Entscheidungsfindung umsetzen.                                                                                      | <input type="checkbox"/> |
| 4  | Personen, die hier arbeiten, sind fest entschlossen, partizipative Entscheidungsfindung umzusetzen.                                                                   | <input type="checkbox"/> |
| 5  | Personen, die hier arbeiten, sind motiviert, partizipative Entscheidungsfindung umzusetzen.                                                                           | <input type="checkbox"/> |
| 6  | Eventuell entstehen bei der Umsetzung von partizipativer Entscheidungsfindung Herausforderungen. Personen, die hier arbeiten, sind zuversichtlich, diese zu meistern. | <input type="checkbox"/> |
| 7  | Personen, die hier arbeiten, sind zuversichtlich, dass sie den Verlauf der Umsetzung von partizipativer Entscheidungsfindung überblicken können.                      | <input type="checkbox"/> |
| 8  | Personen, die hier arbeiten, sind zuversichtlich, dass sie Aufgaben so koordinieren können, dass die Umsetzung reibungslos abläuft.                                   | <input type="checkbox"/> |
| 9  | Personen, die hier arbeiten, sind zuversichtlich, dass die Klinik sie dabei unterstützen kann, partizipative Entscheidungsfindung umzusetzen.                         | <input type="checkbox"/> |
| 10 | Personen, die hier arbeiten, sind zuversichtlich, Machenschaften bei der Umsetzung von partizipativer Entscheidungsfindung bewältigen zu können.                      | <input type="checkbox"/> |



Supplementary File 3: Confirmatory factor analysis model of the 10-item German ORIC

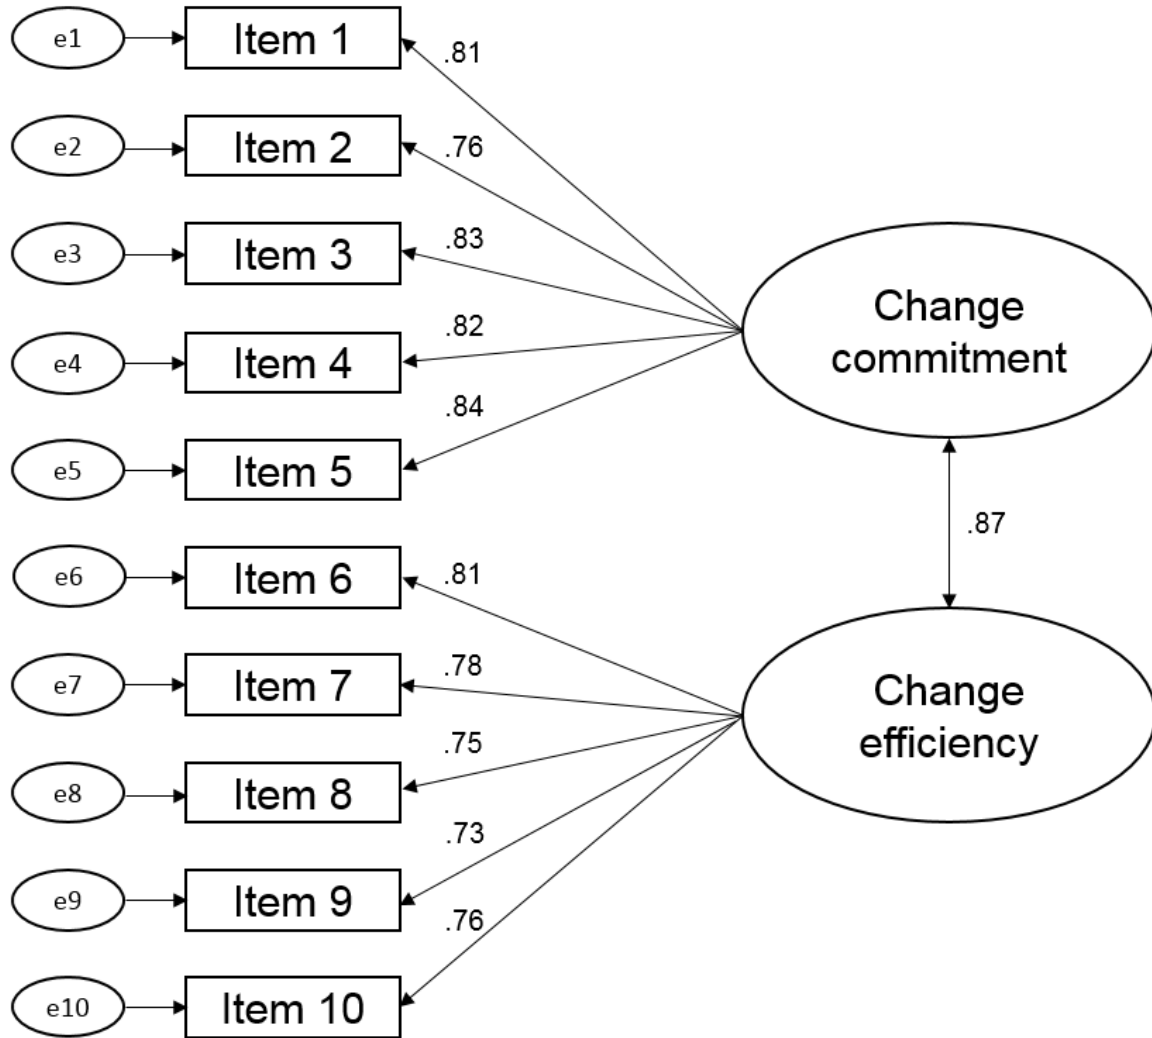

## 1 Supplementary File 4: Results of psychometric evaluation of the 9-item German ORIC version:

### 2 Factor analysis, corrected item-total correlations, Cronbach's $\alpha$

#### 4 Factor analysis

5 To get information about the factorial structure of the 9-item German ORIC, an exploratory factor  
6 analysis was conducted. KMO measure was .926 and Barlett's test of sphericity was significant ( $X^2 =$   
7 1302.78,  $p < .001$ ), indicating that a factor analysis of the data was appropriate to observe data. Table  
8 A shows results of the exploratory factor analysis. Since the main component explains 66% of the  
9 variance, a one-factor model could be assumed. The factor loading for the first component can be  
10 observed in table B.

12 Table A: Results of exploratory factor analysis of the 9-item German ORIC with oblique rotation and  
13 parallel analysis: eigenvalues of the ten components of the German ORIC and eigenvalues for  
14 corresponding random data.

|             | Eigenvalue |               |              | Eigenvalues for random data |                |
|-------------|------------|---------------|--------------|-----------------------------|----------------|
|             | Total      | % of variance | Cumulative % | Means                       | 95% percentile |
| Component 1 | 6.02       | 66.85         | 66.85        | 1.45                        | 1.59           |
| Component 2 | 0.802      | 8.91          | 75.76        | 1.29                        | 1.39           |
| Component 3 | 0.472      | 5.25          | 81.01        | 1.17                        | 1.25           |
| Component 4 | 0.392      | 4.35          | 85.37        | 1.07                        | 1.14           |
| Component 5 | 0.366      | 4.06          | 89.43        | 0.98                        | 1.05           |
| Component 6 | 0.304      | 3.38          | 92.81        | 0.89                        | 0.96           |
| Component 7 | 0.250      | 2.78          | 95.59        | 0.81                        | 0.87           |
| Component 8 | 0.232      | 2.57          | 98.16        | 0.71                        | 0.79           |
| Component 9 | 0.165      | 1.84          | 100.00       | 0.61                        | 0.69           |

Notes: For EFA, half of the data set (n=115) was used.

17 Table B: Factor loadings on the first component.

|        | Component 1 |
|--------|-------------|
| Item 1 | 0.860       |
| Item 2 | 0.856       |
| Item 3 | 0.837       |
| Item 4 | 0.836       |
| Item 5 | 0.835       |
| Item 6 | 0.799       |
| Item 7 | 0.797       |
| Item 8 | 0.791       |
| Item 9 | 0.739       |

Notes: For EFA, the sample was split and n=115.

19 A confirmatory factor analysis was performed with the one-factor model to analyse its fit indices. Indices  
 20 of the one-factor model are presented in table C.

22 Table C: Fit indices of the one-factor model of the 9-item German ORIC.

|                  | Chi <sup>2</sup> <sup>1</sup> | df <sup>2</sup> | Chi <sup>2</sup> /df <sup>3</sup> | CFI <sup>4</sup> | TLI <sup>5</sup> | RMSEA <sup>6</sup> | AIC <sup>7</sup> | PNFI <sup>8</sup> |
|------------------|-------------------------------|-----------------|-----------------------------------|------------------|------------------|--------------------|------------------|-------------------|
| One-factor model | 56.04                         | 27              | 2.08                              | .945             | .927             | .097               | 92.04            | .676              |

Notes: One-factor model (including a split data set of n=115): includes items 1 to 9.

<sup>1</sup> discrepancy chi-squared statistic, <sup>2</sup> degrees of freedom, <sup>3</sup> normed chi-squared statistic, <sup>4</sup> comparative fit indexes, <sup>5</sup> Tucker-Lewis Index, <sup>6</sup> root mean square error of approximation, <sup>7</sup> Akaike Information Criterion, <sup>8</sup> Parsimonious Normed Fit Index (PNFI). \*  $p = .000$

### 24 Corrected item-total correlations and Cronbach's $\alpha$ of the 9-item ORIC version

25 Table D shows the corrected item-total correlation. Corrected item-total correlation ranged from .665  
 26 (item 9) to .744 (item 3).

28 Table D: Discrimination of the nine items of the German ORIC.

|        | Item discrimination <sup>29</sup><br>(corrected item-total<br>correlation) |
|--------|----------------------------------------------------------------------------|
| Item 1 | .747                                                                       |
| Item 2 | .696                                                                       |
| Item 3 | .777                                                                       |
| Item 4 | .760                                                                       |
| Item 5 | .762                                                                       |
| Item 6 | .759                                                                       |
| Item 7 | .720                                                                       |
| Item 8 | .691                                                                       |
| Item 9 | .638                                                                       |

Notes: Items could be answered on a 5-step Likert scale rating from 0 „disagree“ to 4 „agree“.

32 Cronbach's  $\alpha$  with  $\alpha = .924$  showed the measure to reach excellent reliability.

1 **Supplementary File 5: Checklist for reporting standards. Authors' guideline for Scale**2 **Development and validation results by Cabrera-Nguyen.**

|   | <b>Guidelines by Cabrera-Nguyen [1]</b>                                                                                                                                                                                                                                                                                                                                                                                                                                                                              | <b>Transfer to our study</b>                                                                                                                                                                                                                                        |
|---|----------------------------------------------------------------------------------------------------------------------------------------------------------------------------------------------------------------------------------------------------------------------------------------------------------------------------------------------------------------------------------------------------------------------------------------------------------------------------------------------------------------------|---------------------------------------------------------------------------------------------------------------------------------------------------------------------------------------------------------------------------------------------------------------------|
| 1 | Precisely define the target construct.                                                                                                                                                                                                                                                                                                                                                                                                                                                                               | See page 3 and 4 (Introduction section)                                                                                                                                                                                                                             |
| 2 | Justify the need for your new measure. For example, if measures of the construct exist in the literature, explain the value added by your new scale. How might the new measure enhance the substantive knowledge base or social work practice?                                                                                                                                                                                                                                                                       | See page 4 (Introduction section)                                                                                                                                                                                                                                   |
| 3 | Indicate that you have submitted your initial pool of items to expert review (Worthington & Whittaker, 2006). Report (a) the number of items in the preliminary pool; (b) the number of expert reviewers and their qualifications; and (c) any major changes to your initial item pool following the review (e.g., a substantial decrease in the number of items, changes to the original item response format, overhaul of item pool due to experts' assessment regarding content validity).                        | See page 5 and 6 (Methods section: Measure, Translation, Assessment of comprehensibility and adaption of the scale) and page 9 and 10 (Results section: Translation, Assessment of comprehensibility and adaption of the scale)                                     |
| 4 | Report the name and version of the statistical software package used for all analyses.                                                                                                                                                                                                                                                                                                                                                                                                                               | See page 6 to 8 (Methods section: Assessment of comprehensibility and adaption of the scale, Psychometric evaluation)                                                                                                                                               |
| 5 | Identify and justify the sampling strategy (e.g., convenience, snowball) and sampling frame. Report standard sample demographic characteristics as well as other salient sample characteristics.                                                                                                                                                                                                                                                                                                                     | See page 6 and 7 (Methods section: Assessment of comprehensibility and adaption of the scale, Psychometric evaluation) and page 8 to 10 (Results section: Assessment of comprehensibility and adaption of the scale, Psychometric evaluation) and Additional file 3 |
| 6 | Discuss relevant data preparation and screening procedures. For instance, do the data meet the appropriate assumptions for factor analysis? If not, what actions were taken? Report tests of factorability if appropriate (e.g., report Bartlett's test of sphericity).                                                                                                                                                                                                                                              | See page 10 to 12 (Results section: Psychometric evaluation)                                                                                                                                                                                                        |
| 7 | Provide all dates of data collection.                                                                                                                                                                                                                                                                                                                                                                                                                                                                                | See page 9 to 13 (Results section)                                                                                                                                                                                                                                  |
| 8 | Avoid use of principal components analysis (PCA) as a precursor to CFA (Costello & Osborne, 2005; Worthington & Whittaker, 2006). Instead, start with EFA to assess the underlying factor structure and refine the item pool. EFA should be followed by CFA using a different sample (or samples) to evaluate the EFA-informed a priori theory about the measure's factor-structure and psychometric properties. (Costello & Osborne, 2005; Henson & Roberts, 2006; Worthington & Whittaker, 2006). For CFA, authors | An a priori hypothesized model for CFA was specified based on the original measures structure. The model could not be confirmed and an EFA was calculated afterwards. The same data set was used for EFA and CFA. For more                                          |

|   |                                                                                                                                                                                                                                                                                                                                                                                                                                                                                                                                                                                                                                                                                                                                                                                                                                                                                                                                                                                                                                                                                                                                                                                                                                                                                                                                                                                                                                                                                                                                                                                                                                                                                                                                                                                                                                                                                                                                                                                                                                                                                                                                                                                                                                                                                                                                                                                                                                                                                                                                                                                                                                                                                                                                                                                                                                                                                                                                                                  |                                                                                                                                                                                                                                                                                                                                                                                                                                                                                                                      |
|---|------------------------------------------------------------------------------------------------------------------------------------------------------------------------------------------------------------------------------------------------------------------------------------------------------------------------------------------------------------------------------------------------------------------------------------------------------------------------------------------------------------------------------------------------------------------------------------------------------------------------------------------------------------------------------------------------------------------------------------------------------------------------------------------------------------------------------------------------------------------------------------------------------------------------------------------------------------------------------------------------------------------------------------------------------------------------------------------------------------------------------------------------------------------------------------------------------------------------------------------------------------------------------------------------------------------------------------------------------------------------------------------------------------------------------------------------------------------------------------------------------------------------------------------------------------------------------------------------------------------------------------------------------------------------------------------------------------------------------------------------------------------------------------------------------------------------------------------------------------------------------------------------------------------------------------------------------------------------------------------------------------------------------------------------------------------------------------------------------------------------------------------------------------------------------------------------------------------------------------------------------------------------------------------------------------------------------------------------------------------------------------------------------------------------------------------------------------------------------------------------------------------------------------------------------------------------------------------------------------------------------------------------------------------------------------------------------------------------------------------------------------------------------------------------------------------------------------------------------------------------------------------------------------------------------------------------------------------|----------------------------------------------------------------------------------------------------------------------------------------------------------------------------------------------------------------------------------------------------------------------------------------------------------------------------------------------------------------------------------------------------------------------------------------------------------------------------------------------------------------------|
|   | should specify an a priori hypothesized model and a priori competing models (Jackson, Gillaspay, & Purc-Stephenson, 2009).                                                                                                                                                                                                                                                                                                                                                                                                                                                                                                                                                                                                                                                                                                                                                                                                                                                                                                                                                                                                                                                                                                                                                                                                                                                                                                                                                                                                                                                                                                                                                                                                                                                                                                                                                                                                                                                                                                                                                                                                                                                                                                                                                                                                                                                                                                                                                                                                                                                                                                                                                                                                                                                                                                                                                                                                                                       | information see page 10 to 12 (Results section).                                                                                                                                                                                                                                                                                                                                                                                                                                                                     |
| 9 | <p>Guidelines for reporting EFA results.</p> <p>How large is a sample? One common rule of thumb is to ensure a person-to-item ratio of 10:1. Another rule of thumb is that <math>N = 300</math> is usually acceptable (Worthington &amp; Whittaker, 2006). However, some researchers have criticized these sample size rules of thumb, noting the appropriate sample size is dependent on the features of the gathered data. These researchers recommend obtaining the largest possible sample because the adequacy of the sample size cannot be determined until after the data have been analyzed (Henson &amp; Roberts, 2006).</p> <p>Run EFA . . . or not. Run a preliminary EFA to determine if further data collection is required based on the following criteria: (a) If communalities are greater than .50 or there are 10:1 items per factor with factor loadings of roughly .4, then a sample size of 150 to 200 is likely to be adequate; (b) If communalities are all at least .60 or there are a minimum of 4:1 items per factor with factor loadings above .6, then even smaller sample sizes may suffice; (Worthington &amp; Whittaker, 2006). Report if additional data collection was necessary due to inadequate sample size. If so, report the new participants' sociodemographic characteristics and test for differences between groups using standard statistical procedures (e.g., t-tests).</p> <p>Give EFA details. Report the specific rotation strategy used (e.g. varimax, geomin). Justify the decision to use an orthogonal or oblique solution. One recommendation is to always begin with an oblique rotation, empirically assess factor intercorrelations, and report them before deciding upon a final rotation solution (Henson &amp; Roberts, 2006; Worthington &amp; Whittaker, 2006). Some researchers argue oblique rotation is always the best approach because (a) factor intercorrelations are the norm in social sciences and (b) both approaches yield the same result if the factors happen to be uncorrelated (Costello &amp; Osborne, 2005). Conversely, other researchers contend that orthogonal rotation is preferable because fewer parameters are estimated—orthogonal rotation is more parsimonious and amenable to replication (Henson &amp; Roberts, 2006). Similarly, some researchers warn against relying on a statistical software package's default settings to determine the appropriate type of oblique rotation (Henson &amp; Roberts, 2006; Worthington &amp; Whittaker, 2006). Others state that doing so is fine (Costello &amp; Osborne, 2005, p.3). Given the lack of consensus, it is probably best to describe what you do and defend your approach on substantive grounds, if possible.</p> <p>Report the whole factor pattern/structure. Always report the whole factor pattern/structure matrix, including all of the items in the analysis. It is recommended that authors report</p> | <p>Sample size is <math>n=115</math>, person-to-item ratio 11.5:1 (see page 7: Methods section, Psychometric analysis)</p> <p>EFA communalities are all above .70, therefore the sample size of <math>n=115</math> can be determined as adequate and no additional data collection was necessary. For more information, see Supplementary File1).</p> <p>See page 6 to 8 (Methods section: Psychometric evaluation)</p> <p>See page 10 to 12 (Results section: Psychometric evaluation) and Supplementary File 1</p> |

|    |                                                                                                                                                                                                                                                                                                                                                                                                                                                                                    |                                                                                                                                                                                                                        |
|----|------------------------------------------------------------------------------------------------------------------------------------------------------------------------------------------------------------------------------------------------------------------------------------------------------------------------------------------------------------------------------------------------------------------------------------------------------------------------------------|------------------------------------------------------------------------------------------------------------------------------------------------------------------------------------------------------------------------|
|    | <p>this information in a chart following the example provided by Henson and Roberts (2006) on page 411.</p>                                                                                                                                                                                                                                                                                                                                                                        |                                                                                                                                                                                                                        |
|    | <p>Criteria for deleting (crossloaded) items. Report any deleted items and the criteria used for deletion. Crossloading items with values <math>\geq .32</math> on at least two factors should generally be candidates for deletion, especially if there are other items with factor loadings of .50 or greater (Costello &amp; Osborne, 2005). Rerun the EFA each time an item is deleted.</p>                                                                                    | <p>No crossloading items could be observed, so item deletion was not necessary.</p>                                                                                                                                    |
|    | <p>Criteria for number of factors. Report the number of factors retained and justify this decision using multiple criteria (eigenvalue <math>&gt; 1</math>, scree test, parallel analysis, rejection of a factor with fewer than 3 items, etc). Reporting the eigenvalue <math>&gt; 1</math> rule alone is inadequate because it has been shown to among the least accurate criteria for assessing factor retention (Costello &amp; Osborne, 2005; Henson &amp; Roberts, 2006)</p> | <p>See page 6 to 8 (Methods section: Psychometric evaluation)</p>                                                                                                                                                      |
|    | <p>Explained variance. Report the variance explained by the factors.</p>                                                                                                                                                                                                                                                                                                                                                                                                           | <p>See page 10 to 12 (Results section: Psychometric evaluation) and Supplementary File 1</p>                                                                                                                           |
|    | <p>In general, describe your decisions.</p>                                                                                                                                                                                                                                                                                                                                                                                                                                        | <p>See page 10 to 12 (Results section: Psychometric evaluation) and Supplementary File 1</p>                                                                                                                           |
| 10 | <p>Guidelines for reporting CFA results.</p>                                                                                                                                                                                                                                                                                                                                                                                                                                       |                                                                                                                                                                                                                        |
|    | <p>Describe and justify the theoretical model. Report hypothesized factor structure. Provide theoretical and empirical justification (e.g., results of preliminary EFAs) for your hypothesis. In addition, report a priori competing models.</p>                                                                                                                                                                                                                                   | <p>See page 6 to 8 (Methods section: Psychometric evaluation)</p>                                                                                                                                                      |
|    | <p>Describe the parameterization. Provide a comprehensive description of the a priori parameter specification. Identify fixed parameters, free parameters, and constrained parameters. For example, indicate if you freed the errors of any items to correlate.</p>                                                                                                                                                                                                                | <p>One factor loading was constrained to equal 1, the corresponding intercept was constrained equal to zero. The other factor loadings and intercepts were estimated. Errors of items were not freed to correlate.</p> |
|    | <p>Include a figure. Include a figure of each CFA model being tested using Kline's (2005) graphical conventions if feasible.</p>                                                                                                                                                                                                                                                                                                                                                   | <p>See Supplementary File 3</p>                                                                                                                                                                                        |
|    | <p>Identification. Demonstrate model identification (e.g., <math>df &gt; 0</math>; scaling of factors; assess and report the —t-rule; the two-indicator rule). Necessary and sufficient conditions for model identification may vary for certain types of CFA models. When in doubt, authors should consult Brown's (2006) CFA text or Kline's (2005) SEM text for guidance.</p>                                                                                                   | <p>See page 10 to 12 (Results section: Psychometric evaluation)</p>                                                                                                                                                    |
|    | <p>Select an estimator based on distributional patterns and assumptions. Report the estimator used (e.g., ML,</p>                                                                                                                                                                                                                                                                                                                                                                  | <p>See page 6 (Methods section: Psychometric evaluation)</p>                                                                                                                                                           |

|    |                                                                                                                                                                                                                                                                                                                                                                                                                                                                                                                                                                                             |                                                                                                                     |
|----|---------------------------------------------------------------------------------------------------------------------------------------------------------------------------------------------------------------------------------------------------------------------------------------------------------------------------------------------------------------------------------------------------------------------------------------------------------------------------------------------------------------------------------------------------------------------------------------------|---------------------------------------------------------------------------------------------------------------------|
|    | WLSMV) and justify your choice based on distributional assumptions. It is not appropriate to report that you relied on your statistical software's default setting.                                                                                                                                                                                                                                                                                                                                                                                                                         |                                                                                                                     |
|    | Use multiple fit indices. After estimating a model, always report multiple fit indices (e.g., model $\chi^2$ , df, p, CFI/TLI, RMSEA, SRMR). Report all appropriate fit indices, not just those favorable to your hypotheses (Jackson et al., 2009). For example, do not report acceptable CFI and TLI scores while omitting a relevant fit index with a suboptimal value.                                                                                                                                                                                                                  | See page 8 (Methods section: Psychometric evaluation) and page 10 and 11 (Results section: Psychometric evaluation) |
|    | What is acceptable fit? For model fit indices, authors should generally use the cut-off values recommended by Hu and Bentler (1999) and endorsed by Brown (2006), assuming ML estimation: a. CFI/TLI $\geq .95$ b. RMSEA $\leq .06$ c. SRMR $\leq .08$                                                                                                                                                                                                                                                                                                                                      | See page 9, Table 1 (Methods section: Psychometric evaluation)                                                      |
|    | Localized strain? When reporting model fit, include an assessment for localized areas of strain by examining standardized residuals. Standardized residuals greater than 1.96 (for $p < .05$ ) indicate areas of strain (Harrington, 2009). Report the absence of localized strain, if appropriate; otherwise, note localized areas of strain by reporting the relevant standardized residuals.                                                                                                                                                                                             | Standardized residuals do not indicate localized strains.                                                           |
|    | Parameter estimates and SEs. When reporting factor loadings and other parameter estimates, always report the unstandardized estimates, their p values, and the standard errors. In addition, include the standardized estimates when appropriate. Be sure to report all parameter estimates, even those that are non significant (Brown, 2006; Jackson et al., 2009).                                                                                                                                                                                                                       | See Supplementary File 3                                                                                            |
|    | Assessing the validity of the factor solution. Comment on the new measure's convergent and discriminant validity based on parameter estimates. For instance, factor correlations $\geq .80$ may indicate poor discriminant validity (Brown, 2006). In addition, strong factor loadings that do not crossload may indicate good convergent validity. One rule of thumb is that factor loadings $< .40$ are weak and factor loadings $\geq .60$ are strong (Garson, 2010).                                                                                                                    | Exploratory factor analysis revealed a one-factor model, so there are no factor correlations.                       |
|    | Other measures. Report squared multiple correlations and comment on the measure's reliability (e.g., report Raykov's Rho if appropriate)                                                                                                                                                                                                                                                                                                                                                                                                                                                    | See page 10 to 12 (Results section: Psychometric analysis)                                                          |
|    | Respecification: Caution! Report any post-hoc respecifications to improve model fit based on modification indices. Justify the respecifications on theoretical or conceptual grounds (Jackson et al., 2009). Respecification to allow for correlated errors is not supportable without strong pragmatic justification (e.g., items contain similar words or phrases). Note that respecification precludes comparing the model with your a priori specified competing models. Report improvements in appropriate model fit indices for respecified models (e.g., chi-square difference test) | No respecifications to improve model fit were applied.                                                              |
| 10 | Describe the matrix (or matrices) you analysed (e.g., covariance, correlation). Include matrices in the manuscript                                                                                                                                                                                                                                                                                                                                                                                                                                                                          | See Supplementary File 1                                                                                            |

|    |                                                                                                                                                                                                                                                                                                                                                                                                                                                                     |                                                                                                              |
|----|---------------------------------------------------------------------------------------------------------------------------------------------------------------------------------------------------------------------------------------------------------------------------------------------------------------------------------------------------------------------------------------------------------------------------------------------------------------------|--------------------------------------------------------------------------------------------------------------|
|    | if feasible; otherwise, indicate these data are available upon request.                                                                                                                                                                                                                                                                                                                                                                                             |                                                                                                              |
| 11 | Report the amount of missing data and describe how missing data were handled. For a review of practices for handling missing data, see Sterne and colleagues (2009), Rose and Fraser (2008), and Horton and Kleinman (2007). Provide a rationale for your approach to handling missing data. Authors are encouraged to consider using multiple imputation or model estimation with full-information maximum likelihood (FIML; Rose & Fraser, 2008).                 | See page 7 (Methods section: Psychometric evaluation) and page 10 (Results section: Psychometric evaluation) |
| 12 | Compare your CFA model with the alternative or competing models. Do competing models fit the data better or worse than your model (e.g., does your four-factor model of acculturation fit the data better than a two-factor model or a one-factor model)? Identify the preferable model based on appropriate fit statistics (e.g. chi-square difference test for nested models, Akaike information criterion for non-nested models), parsimony, and relevant theory | See page 15 and 16 (Discussions sections)                                                                    |
| 13 | Include your scale (items and response options) in an appendix.                                                                                                                                                                                                                                                                                                                                                                                                     | See Supplementary File 2                                                                                     |
| 14 | Report how methodological limitations may have impacted findings regarding your measure's psychometric properties (e.g., note potential repercussions of suboptimal sampling techniques, discuss implications of using listwise deletion to handle missing data instead of multiple imputation or FIML).                                                                                                                                                            | See page 16 and 17 (Discussions sections)                                                                    |
| 15 | Discuss directions for future research (e.g., if appropriate, testing your scale for measurement invariance by conducting CFA on different populations).                                                                                                                                                                                                                                                                                                            | See page 16 and 17 (Discussions sections)                                                                    |

1 Cabrera-Nguyen P. Author Guidelines for Reporting Scale Development and Validation Results in the *J Soc Social Work Res* 2010;1:99–103.



# BMJ Open

## Translation and psychometric evaluation of the German version of the Organizational Readiness for Implementing Change measure (ORIC) – a cross-sectional study

|                                 |                                                                                                                                                                                                                                                                                                                                                                                                  |
|---------------------------------|--------------------------------------------------------------------------------------------------------------------------------------------------------------------------------------------------------------------------------------------------------------------------------------------------------------------------------------------------------------------------------------------------|
| Journal:                        | <i>BMJ Open</i>                                                                                                                                                                                                                                                                                                                                                                                  |
| Manuscript ID                   | bmjopen-2019-034380.R2                                                                                                                                                                                                                                                                                                                                                                           |
| Article Type:                   | Original research                                                                                                                                                                                                                                                                                                                                                                                |
| Date Submitted by the Author:   | 01-Apr-2020                                                                                                                                                                                                                                                                                                                                                                                      |
| Complete List of Authors:       | Lindig, Anja; University Medical Center Hamburg-Eppendorf, Department of Medical Psychology<br>Hahlweg, Pola; University Medical Center Hamburg-Eppendorf, Department of Medical Psychology<br>Christalle, Eva; University Medical Center Hamburg-Eppendorf, Department of Medical Psychology<br>Scholl, Isabelle; University Medical Center Hamburg-Eppendorf, Department of Medical Psychology |
| <b>Primary Subject Heading</b>: | Research methods                                                                                                                                                                                                                                                                                                                                                                                 |
| Secondary Subject Heading:      | Communication, Evidence based practice, Patient-centred medicine                                                                                                                                                                                                                                                                                                                                 |
| Keywords:                       | Organizational readiness for change, Psychometrics, Translation, Implementation, Shared decision-making, Measurement                                                                                                                                                                                                                                                                             |
|                                 |                                                                                                                                                                                                                                                                                                                                                                                                  |

SCHOLARONE™  
Manuscripts

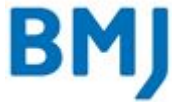

I, the Submitting Author has the right to grant and does grant on behalf of all authors of the Work (as defined in the below author licence), an exclusive licence and/or a non-exclusive licence for contributions from authors who are: i) UK Crown employees; ii) where BMJ has agreed a CC-BY licence shall apply, and/or iii) in accordance with the terms applicable for US Federal Government officers or employees acting as part of their official duties; on a worldwide, perpetual, irrevocable, royalty-free basis to BMJ Publishing Group Ltd ("BMJ") its licensees and where the relevant Journal is co-owned by BMJ to the co-owners of the Journal, to publish the Work in this journal and any other BMJ products and to exploit all rights, as set out in our [licence](#).

The Submitting Author accepts and understands that any supply made under these terms is made by BMJ to the Submitting Author unless you are acting as an employee on behalf of your employer or a postgraduate student of an affiliated institution which is paying any applicable article publishing charge ("APC") for Open Access articles. Where the Submitting Author wishes to make the Work available on an Open Access basis (and intends to pay the relevant APC), the terms of reuse of such Open Access shall be governed by a Creative Commons licence – details of these licences and which [Creative Commons](#) licence will apply to this Work are set out in our licence referred to above.

Other than as permitted in any relevant BMJ Author's Self Archiving Policies, I confirm this Work has not been accepted for publication elsewhere, is not being considered for publication elsewhere and does not duplicate material already published. I confirm all authors consent to publication of this Work and authorise the granting of this licence.

1  
2  
3 1 **Translation and psychometric evaluation of the German version of the Organizational Readiness**  
4  
5 2 **for Implementing Change measure (ORIC) – a cross-sectional study**

6  
7 3 Anja Lindig<sup>1</sup>, Pola Hahlweg<sup>1</sup>, Eva Christalle<sup>1</sup>, Isabelle Scholl<sup>1</sup>  
8  
9 4

10  
11 5  
12 6 <sup>1</sup> *Department of Medical Psychology, University Medical Center Hamburg-Eppendorf, Martinistraße 52,*  
13  
14 7 *20246 Hamburg, Germany*  
15  
16 8

17  
18 9 Email addresses: Anja Lindig: [a.lindig@uke.de](mailto:a.lindig@uke.de)  
19  
20 10 Pola Hahlweg: [p.hahlweg@uke.de](mailto:p.hahlweg@uke.de)  
21  
22 11 Eva Christalle: [e.christalle@uke.de](mailto:e.christalle@uke.de)  
23  
24 12 Isabelle Scholl: [i.scholl@uke.de](mailto:i.scholl@uke.de)  
25  
26 13  
27  
28 14  
29  
30 15

31  
32 16 Corresponding author: Anja Lindig  
33  
34 17 University Medical Center Hamburg-Eppendorf  
35  
36 18 Department of Medical Psychology  
37  
38 19 Martinistr. 52  
39  
40 20 20246 Hamburg, Germany  
41  
42 21 Email: [a.lindig@uke.de](mailto:a.lindig@uke.de)  
43  
44 22 Phone: +49-(0)40-7410-56206  
45  
46 23  
47 24  
48

49 25 Word count: 4186  
50  
51 26  
52  
53 27  
54  
55 28  
56  
57 29  
58  
59 30  
60

1  
2  
3 31 **ABSTRACT**

4  
5 32 **Objectives:** To translate the Organizational Readiness for Implementing Change (ORIC) measure into  
6  
7 33 German and assess its psychometric properties.

8  
9 34 **Design:** Cross-sectional psychometric study based on secondary analysis of baseline data from a shared  
10  
11 35 decision-making implementation study.

12  
13 36 **Setting:** Three departments within one academic cancer center in Hamburg, Germany.

14  
15 37 **Participants:** For comprehensibility assessment of the translated ORIC version, we conducted cognitive  
16  
17 38 interviews with healthcare professionals (HCPs, n=11). Afterwards, HCPs (n=230) filled out the measure.

18  
19 39 **Primary and Secondary Outcome Measures:** The original English version of the ORIC was translated  
20  
21 40 into German using a team translation protocol. Based on comprehensibility assessment via cognitive  
22  
23 41 interviews with HCPs, the translated version was revised. We analyzed acceptance (completion rate),  
24  
25 42 factorial structure (exploratory factor analysis (EFA), confirmatory factor analysis (CFA), model fit), item  
26  
27 43 characteristics (item difficulties, corrected item-total correlations, inter-item correlations), and internal  
28  
29 44 consistency (Cronbach's  $\alpha$ ).

30  
31 45 **Results:** Translation and cognitive testing of the German ORIC was successful except for item 10, which  
32  
33 46 showed low comprehensibility as part of content validity in cognitive interviews. Completion rate was > 97%.  
34  
35 47 EFA and CFA provided a one-factorial structure. Item difficulties ranged between 55.98 and 65.32,  
36  
37 48 corrected item-total-correlation ranged between .665 and .774, inter-item correlations ranged between .434  
38  
39 49 and .723, and Cronbach's  $\alpha$  was .93.

40  
41 50 **Conclusions:** The German ORIC is a reliable measure with high completion rates and satisfying  
42  
43 51 psychometric properties. A one-factorial structure of the German ORIC was confirmed. Item 10 showed  
44  
45 52 limited comprehensibility and therefore reduces content validity of the measure. The German ORIC can be  
46  
47 53 used to analyze organizational readiness for change as a precursor for implementation success of various  
48  
49 54 interventions.

50  
51 55  
52  
53 56 **Keywords:**  
54  
55 57 Organizational readiness for change, Psychometrics, Translation, Implementation, Shared decision-  
56  
57 58 making, Measurement  
58  
59 59  
60  
60 60

## 61 **ARTICLE SUMMARY**

### 62 **Strengths and limitations of this study**

- 63 • Appropriate qualitative methods were used to provide a German version of the ORIC to be  
64 assessed for healthcare professionals (HCPs).
- 65 • The sample size was large enough to robustly perform the psychometric analyses on the German  
66 version of the ORIC measure.
- 67 • Due to the design of the study as a secondary analysis, it was not possible to calculate  
68 psychometric parameters like convergent and divergent validity.
- 69 • Data were collected at a single academic cancer center in the context of a shared decision-making  
70 implementation study. Thus, psychometric properties of the German ORIC need replication in other  
71 settings.

## 73 **INTRODUCTION**

74 Implementing interventions in healthcare systems is an important and widely discussed topic [1–3] and  
75 often mediated by public policies, market forces, or new technologies [4]. The intention to implement new  
76 interventions might be to reduce costs, improve quality, increase efficacy or patient satisfaction [5].  
77 Nevertheless, implementing change in healthcare organizations can be challenging [6–10]. In the German  
78 healthcare system, the implementation of shared decision-making (SDM) has received much attention [11].  
79 SDM can be described as an interactional process on the basis of information exchange. Patients and  
80 healthcare professionals (HCPs) are equally and actively involved and jointly responsible for the decision  
81 [12–14]. This is especially important in situations with complex treatment options and high impact on  
82 patients' quality of life [15]. Patients want to be actively involved in decision-making [16] and benefit from  
83 SDM by developing better knowledge about their disease and treatment options, better risk perception, and  
84 less insecurity and decisional conflict [17,18]. SDM has been supported by health policy [19–21] and  
85 research [22–25] over the last decades. However, SDM is currently not routinely implemented in the  
86 German healthcare system [11,26–28].

87 When implementing SDM or other interventions in organizations, several barriers on different levels of the  
88 organization (i.e., individual level, group level, organizational and system level) need to be considered  
89 [1,5–7,10,29–32]. Barriers for implementing SDM in the clinical setting often address both the  
90 organizational setting (e.g. lack of resources and lack of management support) and the individual level (e.g.

1  
2  
3 91 resistance to change or negative attitudes towards SDM) [7,10,11,33–35]. When implementing SDM or  
4  
5 92 other interventions in healthcare systems, the clinical employees' perspective on organizational readiness  
6  
7 93 for change is a critical precursor for successful implementation [5,32,36–38]. Armenakis et al. [39] describe  
8  
9 94 organizational readiness for change as the degree to which organizational members are prepared to  
10  
11 95 participate in change processes. This is characterized by the belief that the change is needed and that the  
12  
13 96 organization is capable of changing. In their theory of organizational readiness for change, Weiner et al.  
14  
15 97 [40] differentiate between change commitment (i.e., organizational members' attitudes towards  
16  
17 98 implementing a change) and change efficacy (i.e., organizational members' belief in their capability to  
18  
19 99 implement a change). If readiness for change is high, organizational members invest more in the change  
20  
21 100 effort and exhibit greater persistence to overcome barriers and setbacks [40,41].

22 101 To analyze effects of organizational readiness on implementation success, specific measures for assessing  
23  
24 102 organizational readiness for change are needed [5]. However, only a few validated measures exist [5,42–  
25  
26 103 44] and none were available in German. One of those measures is the Organizational Readiness for  
27  
28 104 Implementing Change (ORIC) [43]. The ORIC is brief, easy to administer, and theoretically and  
29  
30 105 psychometrically well-grounded [40]. It was previously translated into Danish and French [45,46]. The ORIC  
31  
32 106 has been psychometrically tested, revealing a completion rate of more than 72%, a Cronbach's  $\alpha$  of above  
33  
34 107 .80 and two correlating factors [43,45,46]. Due to the described properties, the ORIC seemed well-suited  
35  
36 108 to measure organizational readiness for implementing SDM in Germany [5,43,47].

37 109 Therefore, the aim of the study was to translate the ORIC measure into German and assess its  
38  
39 110 psychometric properties.

41 111

## 43 112 **METHODS**

### 45 113 **Measure**

47 114 The ORIC measures organizational readiness for implementing change. It uses a 5-point Likert scale  
48  
49 115 ranging from „disagree“ to „agree“ [43]. In the original English version, two subscales were described based  
50  
51 116 on Weiner et al. [40]: „change commitment“ (items 1 to 5) and “change efficacy” (items 6 to 10). Sum scores  
52  
53 117 were calculated for both subscales separately with higher scores indicating higher organizational readiness  
54  
55 118 for change. By using the phrases “to implement this change” or “implementing this change”, the original  
56  
57 119 scale does not specify which change is addressed. The items can be specified to adapt to a specific

1  
2  
3 120 research question and a survey instruction can be added [40,45]. The English items are displayed in the  
4  
5 121 results section.

6  
7 122  
8  
9 123 **Translation**  
10  
11 124 Translation followed the team translation protocol TRAPD (Translation, Review, Adjudication, Pretesting  
12  
13 125 and Documentation), a method with growing recognition within translation research [48–52]. Thereby an  
14  
15 126 optimal translation is facilitated by discussions between members of the translation team with different  
16  
17 127 expertise in translation. First, two team members (AL, SZ, cp. list of abbreviations) proficient in German  
18  
19 128 and English, but little experienced in survey translation, independently translated the original ORIC into  
20  
21 129 German. Second, a third bilingual team member (IS) with experience in survey translation, reviewed both  
22  
23 130 versions and suggested a third version based on the first two translations. Finally, IS, AL, and SZ discussed  
24  
25 131 all versions until reaching consensus on a final version. To find consensus on item 10 we additionally  
26  
27 132 consulted an official translator (MM, cp. list of abbreviations) and an additional team member (PH), who is  
28  
29 133 proficient in German and English and experienced in translation. During the translation process, we  
30  
31 134 changed the phrases “to implement this change” and “implementing this change” into “to implement shared  
32  
33 135 decision-making” and “implementing shared decision-making” to address our specific research question.  
34  
35 136 Additionally, we added a survey instruction in German which motivated participants to think about the clinic,  
36  
37 137 they are working in, when answering the item. As a next step we pretested the translated measure by  
38  
39 138 conducting cognitive interviews and thereby assessed comprehensibility as part of content validity.

40  
41 139  
42 140 **Assessment of comprehensibility as part of content validity and subsequent adaptation of the scale**

43 141 Content validity is the degree to which the content of the measure and its items adequately reflect the  
44  
45 142 measured construct [53]. According to the COSMIN criteria (Consensus-based standards for the selection  
46  
47 143 of health measurement instruments) [54], content validity includes the relevance of the items and scales,  
48  
49 144 their comprehensiveness, and comprehensibility. As this study aimed to evaluate the translation of an  
50  
51 145 existing measure, we focused on the assessment of comprehensibility (i.e., items being appropriately  
52  
53 146 worded and understood by participants as intended).

54  
55 147 To do so, we conducted two rounds of cognitive interviews with a convenience sample of HCPs (nurses,  
56  
57 148 physicians, and psychooncologists), working in a comprehensive cancer center in Germany. Two female  
58  
59 149 researchers and psychologists experienced in interviewing (AL, PH) conducted the interviews. We  
60

1  
2  
3 150 developed an interview guide based on recommendations by Willis et al. [55]. We used verbal probing  
4  
5 151 techniques like comprehension probes (e.g. "What does the term 'organization' mean to you?") and  
6  
7 152 paraphrasing (e.g. "Can you repeat this sentence in your own words?"). We conducted interviews until  
8  
9 153 reaching theoretical saturation. Interviews were audio-recorded and transcribed verbatim. After the first  
10  
11 154 round of cognitive interviews, we extracted and discussed comments and suggestions from the transcripts  
12  
13 155 (AL, PH, IS). As a further step to enhance comprehensibility, we discussed the items with the original author  
14  
15 156 (CS, cp. list of abbreviations) as well as French (MR, cp. list of abbreviations) and Norwegian researchers  
16  
17 157 (AH, cp. list of abbreviations), who translated the ORIC into their languages. We adapted items of the  
18  
19 158 German ORIC, which were not well understood by participants of the first round of cognitive interviews,  
20  
21 159 according to these discussions. We tested these items in a second round of cognitive interviews. After the  
22  
23 160 second round, we discussed further adaptations of the items and involved another bilingual researcher in  
24  
25 161 the field (DF, cp. list of abbreviations).  
26  
27 162 We calculated descriptive statistics of participants' demographic characteristics using SPSS (IBM SPSS  
28  
29 163 Statistics, Version 23).  
30  
31 164

### 32 165 **Psychometric evaluation**

33  
34 166 **Data collection.** For psychometric evaluation of the ORIC measure we conducted a secondary analysis of  
35  
36 167 cross-sectional data gathered in a SDM implementation study [56]. Data from baseline assessment of the  
37  
38 168 SDM implementation study were included. The ORIC was the last questionnaire of a three-page survey  
39  
40 169 measuring HCPs' attitudes regarding SDM and its implementation. Besides the ORIC, it contained the  
41  
42 170 Control Preference Scale [57] and the IcanSDM [58], demographic questions (e.g. gender, age, profession,  
43  
44 171 work experience) as well as several questions that have been used in previous studies in cancer care [59].  
45  
46 172 Results of these additional measures will be published as part of the primary evaluation of the SDM  
47  
48 173 implementation study [56].  
49  
50 174 Participants were part of a convenience sample of physicians and nurses. Since this is a secondary  
51  
52 175 analysis, inclusion criteria were identical to inclusion criteria of the SDM implementation study [56]. We  
53  
54 176 included physicians and nurses who worked at one of three departments within the University Cancer  
55  
56 177 Center Hamburg at the University Medical Center Hamburg-Eppendorf during baseline evaluation of the  
57  
58 178 SDM implementation study [56]. Eligible HCPs were identified through employee lists provided by  
59  
60 179 department managers. The measure was handed out to eligible HCPs either (1) by a member of our study



1  
2  
3 180 team (e.g. during a regular physician meeting), (2) by the supervising nurses, or (3) via employees'  
4  
5 181 mailboxes. Participants returned the questionnaire personally to a study team member or by mail.

6  
7 182 Data were entered into SPSS (IBM SPSS Statistics, Version 23) including blinded double entry of 20% of  
8  
9 183 the data for quality control.

10  
11 184 **Patient and public involvement.** The ORIC measure preliminary addresses HCPs. Physicians, nurses  
12  
13 185 and psychooncologists were involved in the adaptation of the measure by taking part in cognitive interviews.  
14  
15 186 Patients were not involved in this study.

16  
17 187 **Data Analyses.** Descriptive statistics were calculated for demographic characteristics. Cases were  
18  
19 188 excluded if more than 30% of the ORIC items were missing [60]. For all other cases, missing data were  
20  
21 189 replaced with item means. We evaluated the completion rate and therefore the acceptance of the measure  
22  
23 190 by calculating frequencies of missing data per item as well as for the overall measure. For this analysis, we  
24  
25 191 also included cases with more than 30% of ORIC items missing because these values are part of  
26  
27 192 completion rate and relevant for interpretation of acceptance.

28  
29 193 We a priori hypothesized to replicate the theory-based two-dimensional structure of the original English  
30  
31 194 ORIC version. Two correlating factors "change commitment" (item 1 to 5) and "change efficacy" (item 6 to  
32  
33 195 10) were postulated. Kaiser-Meyer-Olkin (KMO) measure of sampling adequacy and the Bartlett's test of  
34  
35 196 sphericity were performed to test prerequisites for factor analysis [61,62]. A confirmatory factor analysis  
36  
37 197 (CFA) with Maximum Likelihood Estimates and two factors was applied for the whole data set as a first  
38  
39 198 step. Because the two-factor model could not be confirmed, we decided to calculate an exploratory factor  
40  
41 199 analysis (EFA) and afterwards an additional CFA to check for model fit. It is recommended to not calculate  
42  
43 200 EFA and CFA with the same data set so the data set was randomized by AL and split into two subsets  
44  
45 201 [63,64]. The first 115 randomized cases including all data of participants were added to EFA, the second  
46  
47 202 115 cases were added to CFA. An EFA with oblique rotation was calculated for the first subset. The non-  
48  
49 203 orthogonal rotation was chosen according to Weiner et al. [40]. In their theory, organizational readiness for  
50  
51 204 change consists of two interrelated dimensions, therefore the two factors are expected to be correlated.  
52  
53 205 Analogue to analyses done by authors of the English ORIC [43,65], we extracted components based on  
54  
55 206 parallel analysis. The criterion of parallel analysis was shown to be superior to other statistic criteria like  
56  
57 207 the Kaiser criterion [66,67]. It compares the eigenvalues of the data to the eigenvalues based on random  
58  
59 208 data with equivalent sample size and number of variables and chooses only factors with eigenvalues higher  
60  
209 than for random data [65,66]. A CFA was calculated for the second subset. A range of global goodness of

210 fit indices were used to assess the degree to which observed data were accounted for by the proposed  
 211 models: discrepancy chi-squared statistic ( $\chi^2$ ), degree of freedom (df), normed chi-squared statistic  
 212 ( $\chi^2/\text{df}$ ), Comparative Fit Index (CFI), Tucker-Lewis Index (TLI), Root Mean Square Error of Approximation  
 213 (RMSEA) as well as Akaike Information Criterion (AIC) and Parsimonious Normed Fit Index (PNFI) for  
 214 analysing model complexity. Established rules to estimate the model fit were used [68–71].

215 Item analyses was performed for the one-factor model. It included calculation of item means and standard  
 216 deviation as well as observation of floor and ceiling effects [72], calculation of corrected item-total  
 217 correlations [61,73], inter-item correlations [61,73], and item difficulties [62]. Internal consistency of the  
 218 scale was assessed by Cronbach's alpha coefficient ( $\alpha$ ) [62,73,74]. For a detailed overview on performed  
 219 data analyses, see Table 1.

220 During the translation process and cognitive interviews we found low content validity for item 10 (see results  
 221 section). Thus, the use of item 10 for the German ORIC needs to be evaluated. Accordingly, we also  
 222 conducted psychometric analyses (EFA with oblique rotation and extraction of components based on  
 223 parallel analysis, corrected item-total correlations, Cronbach's  $\alpha$ , and goodness of fit indexes) for the 9-item  
 224 version of the ORIC.

225 Analysis of demographic data, analysis of completion rate, item analysis and EFA were performed using  
 226 SPSS (IBM SPSS Statistics, Version 23). CFA and calculation of model fit indices were performed using  
 227 Amos (IBM SPSS Amos 22.0.0).

228

229 Table 1: Psychometric analyses conducted.

| Psychometric measure                                                                    | Criteria                                                                                                                                                                                                                                                              |
|-----------------------------------------------------------------------------------------|-----------------------------------------------------------------------------------------------------------------------------------------------------------------------------------------------------------------------------------------------------------------------|
| Kaiser-Meyer-Olkin (KMO) measure of sampling adequacy and Bartlett's test of sphericity | These tests ensure that correlations between variables can be accounted for by a smaller set of factors [61]. KMO value should be higher than .05 and Bartlett's test value should be less than .05 to fulfil the criteria for calculating a factor analysis [61,62]. |
| Normed chi-squared statistic ( $\chi^2/\text{df}$ )                                     | $\chi^2/\text{df}$ is an indicator for model fit, dependent on sample size and should be as small as possible. A ratio between 2 and 3 indicate a good data fit [68].                                                                                                 |
| Comparative fit indexes (CFI)                                                           | CFIs is an indicator for model fit. It ranges from 0 to 1 and higher values indicate better fit. Values above .95 indicate a good model fit [71,75].                                                                                                                  |
| Tucker-Lewis Index (TLI)                                                                | TLI is an indicator for model fit. It corrects for complexity of the model and is sensitive to small sample sizes. Values above .95 indicate good fit [69].                                                                                                           |

|                                                         |                                                                                                                                                                                                                                                    |
|---------------------------------------------------------|----------------------------------------------------------------------------------------------------------------------------------------------------------------------------------------------------------------------------------------------------|
| Root mean square error of approximation (RMSEA)         | RMSEA is an absolute index which describes closeness to fit. Values below .05 indicate a good fit, values between .05 and .08 indicate an adequate fit, values between .08 and 1 indicate a moderate fit and values above 1 are unacceptable [76]. |
| Akaike Information Criterion (AIC)                      | AIC is a parsimony model fit index. It can be used to compare fit of competing models with smaller values indicating better fit [68,71].                                                                                                           |
| Parsimonious Normed Fit Index (PNFI)                    | PNFI is a parsimony model fit index. It ranges between 0 and 1 and higher values indicate a more parsimonious fit [68]. No threshold levels are recommended and it has to be analyzed in combination with other goodness of fit indices [71].      |
| Analysis of frequencies for item response distributions | Floor and ceiling effects were assumed present if more than 15% of participants choose the lowest or highest possible score [72].                                                                                                                  |
| Corrected item-total correlations                       | If items correlate with the total score of above .30, they measure the same underlying concept. Items with lower correlations should be removed because they do not add exploratory power to the measure [61,73].                                  |
| Item difficulties                                       | Item difficulties are calculated by dividing item means by the maximal value of the answer range (0-4) and multiplying it with 100. Item difficulty should be near to 50%, and items should not differ much in their difficulty level [62].        |
| Inter-item correlations                                 | Inter-item correlations ensure association between items. High inter-item correlations of above .80 indicate that items ask the same questions and might be redundant [61,73].                                                                     |
| Cronbach's $\alpha$                                     | Cronbach's $\alpha$ is a measure for reliability and internal consistency. A value of at least .70 is acceptable and higher coefficients indicate a more stable measure [61,62,74].                                                                |

230

231

232 **RESULTS**

233 To report the results of this validation study, we used the Authors' Guidelines for Reporting Scale  
234 Development and Validation Results by Cabrera-Nguyen (see Supplementary File 1).

235

236 **Translation**

237 Both translators (AL and SZ) and the reviewer (IS) did not differ much in their translations of items 2 to 5  
238 and 8 as well as the response scale. For these items and the response scale, only the choice of single  
239 words differed without differences in meaning. Greater translation differences were found for items 1, 6, 7,  
240 9, and 10. For item 1, the word "committed" was differently translated. For items 6 and 7, differences were  
241 found in the translation of the phrase "feel confident" and the sentence structure. For item 9, differences  
242 mainly addressed translation of the phrases "feel confident" and "adjust to this change". For item 10,

1  
2  
3 243 differences occurred in the translation of the term “manage the politics” and the sentence structure. Within  
4  
5 244 the first round of team discussion, we reached consensus for items 2 to 9, the translation of the response  
6  
7 245 scale and the survey introduction. For item 1 we suggested two versions to be further tested in subsequent  
8  
9 246 cognitive interviews. We struggled to translate the phrase “manage the politics” in item 10 into German.  
10  
11 247 Therefore, we discussed item 10 with additional colleagues (cp. methods section) until consensus was  
12  
13 248 found.

14  
15 249

### 16 250 **Assessment of comprehensibility as part of content validity and subsequent adaptation of the scale**

17  
18 251 To test the German ORIC for comprehensibility, cognitive interviews with n=11 participants (nurses,  
19  
20 252 physicians, and psychooncologists) were conducted. Cognitive interviews lasted about one hour. For  
21  
22 253 demographic data of participants see Table A in Supplementary File 2.

23  
24 254 After the first round of cognitive interviews (n=7), no changes have to be made to the response scale as  
25  
26 255 well as for items 2 to 5 and 8 because these items were already well understood by participants. Participants  
27  
28 256 made some minor suggestions for modifications for the introductory description and items 1 and 6.  
29  
30 257 Additionally, some participants did not understand the correct meaning of items 7, 9 and 10 in general or  
31  
32 258 of single words or phrases of these items. After discussions and modifications of these items, we tested  
33  
34 259 alternative versions of the survey introduction, for items 1, 6, 9 and 10 as well as two alternative versions  
35  
36 260 of item 7. After the second round of cognitive interviews (n=4), items 1, 6 and 9 were now understood well  
37  
38 261 by all participants. We had to slightly modify the survey introduction again and decided to use the version  
39  
40 262 of item 7 which was understood best. After all, item 10 could not be translated successfully. Both rounds of  
41  
42 263 cognitive interviews showed that comprehension of the German translation of the phrase “manage the  
43  
44 264 politics” did not picture the correct English meaning. Thus, in a next step we consulted with DF (cp. list of  
45  
46 265 abbreviations) and reached consensus on a final version. Nevertheless, the final version of item 10 was  
47  
48 266 still not satisfying from the study team and experts view. Item 10 was found to have low comprehensibility  
49  
50 267 as part of content validity according to COSMIN criteria [54]. The final German ORIC measure, used in this  
51  
52 268 study, is presented in Supplementary File 3.

53 269 During cognitive interviews some nurses reported that they had not heard about the term “shared decision-  
54  
55 270 making” (German: “Partizipative Entscheidungsfindung”) prior to participation. Thus, we provided a  
56  
57 271 definition of SDM in the introduction part of the questionnaire within the SDM implementation study [56].

58  
59 272  
60

273 **Psychometric evaluation**

274 **Sample characteristics.** Data of 235 HCPs were available for this secondary analysis. In line with  
 275 recommendations of Bannan [60], five cases (0.02% of all cases) were excluded (except for assessment  
 276 of completion rate), because all items of the ORIC were missing. Missing values were replaced by means  
 277 and data of 230 HCPs could be included into analyses.

278 Table 2 provides an overview of participants' demographic characteristics. Most of the 230 HCPs were  
 279 between 31 and 40 years old (37.0%), female (70.4%), worked as a nurse (57.0%), and had a work  
 280 experience of < 5 years (43.9%).

281

282 Table 2: Demographic characteristics of participants (n=230).

|                               |                                                           | N   | %    |
|-------------------------------|-----------------------------------------------------------|-----|------|
| Age                           | < 30 years                                                | 72  | 31.3 |
|                               | 31-40 years                                               | 85  | 37.0 |
|                               | 41-50 years                                               | 42  | 18.3 |
|                               | > 50 years                                                | 26  | 11.3 |
|                               | Missings                                                  | 5   | 2.2  |
| Gender                        | Female                                                    | 162 | 70.4 |
|                               | Male                                                      | 59  | 25.7 |
|                               | Different gender or preferred not to answer this question | 5   | 2.1  |
|                               | Missings                                                  | 4   | 1.7  |
| Profession                    | Nurse                                                     | 131 | 57.0 |
|                               | Junior physician                                          | 69  | 30.0 |
|                               | Senior physician                                          | 27  | 11.7 |
|                               | Missings                                                  | 3   | 1.3  |
| Work experience in healthcare | < 5 years                                                 | 101 | 43.9 |
|                               | 5-10 years                                                | 48  | 20.9 |
|                               | 11-20 years                                               | 46  | 20.0 |
|                               | > 20 years                                                | 28  | 12.2 |
|                               | Missings                                                  | 7   | 3.0  |

283

284

285 **Factor analysis.** Requirements for factor analysis were met [54]. Sample size was large enough (>100),  
 286 even for a split data set with n=115. Furthermore, no outliers were found and data values were  
 287 approximately normally distributed. KMO measure was .933 and Barlett's test of sphericity yielded  $X^2 =$   
 288 1485.11,  $p < .001$ . This indicates that a factor analysis of the data was appropriate [61,62]. CFA for the  
 289 hypothesised two-factor model showed a high correlation of .87 between the two components (see  
 290 Supplementary File 4). Therefore, we postulated a one-factorial structure and conducted a post-hoc EFA.  
 291 As shown in Table 3, only the first component had an eigenvalue higher than 95% percentile of the  
 292 eigenvalues of corresponding random data and the main component explains 67.23% of the variance.

293 Thus, according to parallel analysis, a one-factor model was assumed. The factor loadings for the first  
294 component were above 0.754 for all items (see Table B of Supplementary File 2).

295  
296 Table 3: Results of EFA with oblique rotation and parallel analysis: eigenvalues of the ten components of  
297 the German ORIC and eigenvalues for corresponding random data.

|              | Eigenvalues |               |              | Eigenvalues for random data |                |
|--------------|-------------|---------------|--------------|-----------------------------|----------------|
|              | Total       | % of variance | Cumulative % | Means                       | 95% percentile |
| Component 1  | 6.72        | 67.23         | 67.23        | 1.49                        | 1.65           |
| Component 2  | 0.83        | 8.30          | 75.53        | 1.33                        | 1.44           |
| Component 3  | 0.47        | 4.75          | 80.28        | 1.21                        | 1.30           |
| Component 4  | 0.41        | 4.08          | 84.36        | 1.11                        | 1.19           |
| Component 5  | 0.39        | 3.91          | 88.28        | 1.02                        | 1.08           |
| Component 6  | 0.32        | 3.24          | 91.52        | 0.93                        | 1.00           |
| Component 7  | 0.27        | 2.74          | 94.26        | 0.85                        | 0.92           |
| Component 8  | 0.23        | 2.34          | 96.60        | 0.77                        | 0.84           |
| Component 9  | 0.17        | 1.74          | 98.35        | 0.68                        | 0.75           |
| Component 10 | 0.16        | 1.65          | 100.00       | 0.58                        | 0.66           |

Notes: For EFA, half of the data set (n=115) was used.

298  
299 A second CFA was performed with the one-factor model to analyze its fit indices. Indices of the two-factor  
300 model and the one-factor model are compared in Table 4.

301  
302 Table 4: Fit indices of two calculated models for factor analysis of the German ORIC.

|                  | Chi <sup>2</sup> <sup>1</sup> | df <sup>2</sup> | Chi <sup>2</sup> /df <sup>3</sup> | CFI <sup>4</sup> | TLI <sup>5</sup> | RMSEA <sup>6</sup> | AIC <sup>7</sup> | PNFI <sup>8</sup> |
|------------------|-------------------------------|-----------------|-----------------------------------|------------------|------------------|--------------------|------------------|-------------------|
| Two-factor model | 81.71*                        | 34              | 2.40                              | .968             | .947             | .078               | 143.71           | .585              |
| One-factor model | 77.19*                        | 35              | 2.20                              | .928             | .907             | .103               | 117.19           | .682              |

Notes: Two-factor model was calculated for the whole data set (n=230): factor 1 includes item 1 to 5, factor 2 includes item 6 to 10; One-factor model was calculated for half of the data set (n=115): includes items 1 to 10.

<sup>1</sup> discrepancy chi-squared statistic, <sup>2</sup> degrees of freedom, <sup>3</sup> normed chi-squared statistic, <sup>4</sup> comparative fit indexes, <sup>5</sup> Tucker-Lewis Index, <sup>6</sup> root mean square error of approximation, <sup>7</sup> Akaike Information Criterion, <sup>8</sup> Parsimonious Normed Fit Index (PNFI). \*  $p = .000$

303  
304  
305 Results of factor analysis for the 9-item version of the ORIC (without item 10) were similar. Also for the 9-  
306 item version, a one-factor model was assumed by exploratory factor analysis. Only the first component had  
307 an eigenvalue higher than 95% percentile of the eigenvalues of corresponding random data and the main  
308 component explains 66.85% of the variance. Factor loadings of the first component are above 0.739 for all  
309 items (see Supplementary File 5, Tables A and B). Goodness of fit indices of the one-factor model of the

1  
2  
3 310 9-item ORIC version showed similar values compared to the 10-item ORIC version (see Supplementary  
4  
5 311 File 5, Table C).

6  
7 312  
8  
9 313 **Analysis of the ORIC items and internal consistency.** Table 5 shows response distribution, means,  
10  
11 314 standard deviations, acceptance, corrected item-total correlation, and item difficulty of the ten items. Means  
12  
13 315 ranged between 2.24 (item 9) and 2.61 (item 5). Most participants responded in the middle of the scale with  
14  
15 316 a slight shift to more agreement. For items 1 to 9, between four and six missing values could be detected.  
16  
17 317 For item 10, nine missing values were found. Taking all items into account, more than 97% of the measure  
18  
19 318 were answered. Corrected item-total correlations ranged from .665 (item 9) to .774 (item 3), item difficulties  
20  
21 319 from 55.98 (item 9) to 65.32 (item 5), and inter-item correlations from .434 (item 2 and item 9) to .723 (item  
22  
23 320 3 and item 5) (see Table C of Supplementary File 2). Internal consistency yielded a Cronbach's  $\alpha$  of .93.  
24  
25 321 Additionally, corrected item-total correlations and internal consistency were calculated for the 9-item ORIC  
26  
27 322 version (see Supplementary File 5, Table D). They were similar to the results for the 10-item version with  
28  
29 323 corrected item-total correlations between .638 (item 9) and .777 (item 3) and a Cronbach's  $\alpha$  of .92.

30 324

31 325

326 Table 5: Response distribution, means, standard deviation, acceptance, discrimination and item difficulty of the German ORIC.

| Items                                                                                                                              | Disagree<br>N (%) | Somewhat<br>Disagree<br>N (%) | Neither<br>Agree nor<br>Disagree<br>N (%) | Somewhat<br>Agree<br>N (%) | Agree<br>N (%) | Mean (SD)   | Acceptance<br>(Comple-<br>tion rate in<br>%)* | Item<br>discrimination<br>(corrected<br>item-total<br>correlation) | Item<br>difficulty |
|------------------------------------------------------------------------------------------------------------------------------------|-------------------|-------------------------------|-------------------------------------------|----------------------------|----------------|-------------|-----------------------------------------------|--------------------------------------------------------------------|--------------------|
| 1 People who work here are committed to implementing shared decision-making.                                                       | 1 (0.4)           | 22 (9.6)                      | 109 (47.0)                                | 73 (30.9)                  | 25 (10.9)      | 2.42 (.826) | 97.43                                         | .744                                                               | 60.58              |
| 2 People who work here will do whatever it takes to implement shared decision-making.                                              | 4 (1.7)           | 37 (16.1)                     | 103 (44.8)                                | 68 (29.6)                  | 18 (7.4)       | 2.25 (.878) | 98.29                                         | .689                                                               | 56.36              |
| 3 People who work here want to implement shared decision-making.                                                                   | 0 (0.0)           | 15 (6.5)                      | 107 (46.5)                                | 84 (35.7)                  | 24 (10.4)      | 2.50 (.768) | 97.43                                         | .774                                                               | 62.61              |
| 4 People who work here are determined to implement shared decision-making.                                                         | 2 (9.0)           | 38 (16.5)                     | 107 (46.5)                                | 67 (29.1)                  | 16 (7.0)       | 2.25 (.843) | 98.29                                         | .758                                                               | 56.19              |
| 5 People who work here are motivated to implement shared decision-making.                                                          | 1 (0.4)           | 16 (7.0)                      | 85 (37.0)                                 | 97 (42.2)                  | 31 (13.5)      | 2.61 (.821) | 98.29                                         | .764                                                               | 65.32              |
| 6 People who work here feel confident that they can handle the challenges that might arise in implementing shared decision-making. | 2 (0.9)           | 20 (8.7)                      | 93 (40.4)                                 | 93 (40.4)                  | 22 (9.6)       | 2.49 (.819) | 98.29                                         | .760                                                               | 62.28              |
| 7 People who work here feel confident that they can keep track of progress in implementing shared decision-making.                 | 1 (0.4)           | 26 (11.3)                     | 93 (40.4)                                 | 92 (40.0)                  | 18 (7.8)       | 2.43 (.811) | 98.29                                         | .725                                                               | 60.87              |
| 8 People who work here feel confident that they can coordinate tasks so that implementation goes smoothly.                         | 5 (2.2)           | 24 (10.4)                     | 107 (46.5)                                | 78 (33.5)                  | 16 (6.5)       | 2.32 (.833) | 99.56                                         | .697                                                               | 58.13              |
| 9 People who work here feel confident that the organization can support people as they adjust to shared decision-making.           | 6 (2.6)           | 43 (18.7)                     | 89 (38.7)                                 | 74 (32.2)                  | 18 (7.8)       | 2.24 (.934) | 97.86                                         | .665                                                               | 55.98              |
| 10 People who work here feel confident that they can manage the politics of implementing shared decision-making.                   | 3 (1.3)           | 24 (10.04)                    | 122 (50.9)                                | 65 (28.3)                  | 16 (7.0)       | 2.29 (.796) | 96.15                                         | .714                                                               | 57.44              |

Notes: Items could be answered on a 5-step Likert scale rating from 0 „disagree“ to 4 „agree“. SD = standard deviation. \* For calculation of completion rate, five additional cases were included because these participants only skipped the ORIC but filled out the rest of the survey.

327



## 328 **DISCUSSION**

329 The original English ORIC measure is a brief measure with good psychometric properties [43], which were  
330 confirmed in Danish [45] and French [46] validation studies. The study at hand aimed to translate the ORIC  
331 into German and assess its psychometric properties.

332  
333 **Translation and assessment of comprehensibility as part of content validity**  
334 Items 1 to 9 were translated and adapted successfully after two rounds of cognitive interviews and several  
335 rounds of discussions within the study team and with external experts. The translation team quickly reached  
336 consensus for items 2 to 5 and 8. These items were also well understood by all participants within the first  
337 round of cognitive interviews. For items 1, 6, 7 and 9, the translation process was more complex and several  
338 adaptations and discussions were necessary. Feedback by participants, members of the study team, and  
339 external experts as well as completion rates suggest that comprehensibility of item 10 seems to be low [54].  
340 This might be due to the translation of the phrase “manage the politics” into “Machenschaften”. The term  
341 “manage the politics” seems to have a strong cultural connotation and no equivalent phrase in German  
342 language exists. The German term “Machenschaften” might have a different connotation as the English  
343 phrase and might lead to skipping the item. Ruest et al. [46], who translated the English ORIC into French,  
344 also identified several differences in cultural concepts during their adaptation process, but could translate  
345 all items successfully. They concluded that limitations in linguistic validation could decrease comparability  
346 of psychometric results of the translated measure. However, item 10 showed similar and inconspicuous  
347 item characteristics compared to other items in our sample. When repeating factor and item analyses for  
348 the 9-item ORIC version including only item 1 to 9, very similar results were observed compared to the 10-  
349 item version. To increase comprehensibility and thereby content validity of the scale, the use of the 9-item  
350 German ORIC might be a solution and should be evaluated in future studies.

## 352 **Factor analysis**

353 We a priori hypothesized a two-factorial structure of the German ORIC, because Shea et al. [43] described  
354 correlations between the two theory-based factors “change commitment” and “change efficacy” of .56 to  
355 .60. However, we found much higher factor correlations of 0.87. Results of the subsequent EFA clearly  
356 indicated a one-factorial structure. Thus, we could not confirm the two-factor structure of the English and  
357 the translated Danish and French versions of ORIC [43,45,46]. When comparing the two models, both

1  
2  
3 358 models have acceptable values for  $\chi^2/df$  [68] and CFI [71,75], but only the two-factor model has  
4  
5 359 acceptable values for TLI [69] and RMSEA [76]. When involving parsimony of the models by calculating  
6  
7 360 AIC and PNFI, the one-factor model fits better to the data [68,71]. Therefore, we prefer the more  
8  
9 361 parsimonious one-factor model. These differences to previous validation studies might be a consequence  
10  
11 362 of diverse cultural connotations of the ORIC items in different languages, caused by the adaptation to the  
12  
13 363 context of SDM, or due to specific characteristics of the participating clinics.  
14  
15 364

### 16 365 **Analysis of ORIC items and internal consistency**

17  
18 366 Since the ORIC was presented as the last measure in a three-page survey, missing values might indicate  
19  
20 367 respondent fatigue. However, missing value rates for single items and the overall measure were quite low  
21  
22 368 and the German ORIC was found to be a well-accepted measure. There were no floor or ceiling effects.  
23  
24 369 Corrected item-total correlations of above .66 indicate that all items measure the same underlying concept  
25  
26 370 [61,73]. Criteria for good item difficulties are met since item difficulties are near to 50% and do not differ  
27  
28 371 much from each other [62]. Inter-item correlations are below .80, indicating that items add additional  
29  
30 372 information and are not redundant [61,73]. Cronbach's  $\alpha$  ( $\alpha=.93$ ) suggest excellent internal consistency  
31  
32 373 [61,62,74]. In summary, item analysis and internal consistency of the German ORIC suggest good quality  
33  
34 374 of the measure.

35  
36 375 Nevertheless, according to Streiner and Norman [62] a Cronbach's  $\alpha$  above .90 might also indicate item  
37  
38 376 redundancy. On the other hand, inter-item correlations and corrected item-total correlations are in an  
39  
40 377 acceptable range [61,73]. In implementation research there is a need for preferably brief measures, which  
41  
42 378 can be applied in diverse settings with high work-load. Thus, future research could investigate the possibility  
43  
44 379 to further reduce the number of items.  
45  
46 380

### 47 381 **Strengths and Limitations**

48  
49 382 This study has some limitations. First, several psychometric parameters are not analysable because this  
50  
51 383 study was a secondary analysis of cross-sectional data. It was not possible to calculate e.g. convergent or  
52  
53 384 divergent validity yet. Second, we applied the ORIC only in three departments of one University Medical  
54  
55 385 Center in Germany. Further validation in different organizational settings is needed to ensure  
56  
57 386 generalizability. Third, for this psychometric evaluation we used a German ORIC, which we adapted and  
58  
59 387 specified for the context of SDM implementation. Our results might not be generalizable for other  
60

1  
2  
3 388 interventions in other organizations. Fourth, although SDM was not implemented to the participating clinics  
4  
5 389 before, there might be participants who were more familiar with the concept of SDM than others. Fifth, item  
6  
7 390 10 was again slightly changed after finishing cognitive interviews. This item was not finally tested for  
8  
9 391 comprehensibility.

10  
11 392 A major strength of this study is that we provided the first measure to assess organizational readiness for  
12  
13 393 change in German language for use in implementation studies. We conducted an elaborated translation  
14  
15 394 procedure, which was recommended for survey translations. We furthermore used a qualitative approach  
16  
17 395 to explore comprehensibility including discussions with international colleagues and experts outside of the  
18  
19 396 study team. Furthermore, we assessed the ORIC in a sample including physicians and nurses which was  
20  
21 397 large enough to robustly perform the psychometric analysis on the German version of the ORIC measure.

22 398

## 23 24 399 **CONCLUSION**

25  
26 400 Organizational readiness is a crucial indicator to successfully implement change and a possible barrier if  
27  
28 401 missing. For implementation studies, it is essential to measure organizational readiness with valid and  
29  
30 402 reliable measures. We provide the first German measure for organizational readiness for implementing  
31  
32 403 change and validated it for the context of SDM implementation. The German ORIC is a brief measure with  
33  
34 404 a high completion rate. We found satisfying psychometric properties in a German hospital setting. To  
35  
36 405 increase content validity of the measure, the use of a 9-item German ORIC (without item 10) should be  
37  
38 406 evaluated in future studies. As the ORIC targets the attitude of organizational members, it can detect  
39  
40 407 reduced or missing readiness for implementing a change on the individuals' level. Therefore, the German  
41  
42 408 ORIC can be used to analyze organizational readiness as a possible barrier for implementing various  
43  
44 409 interventions in organizations.

45 410

## 46 47 411 **LIST OF ABBREVIATIONS**

48  
49 412 AH: Anne Haugstvedt

50  
51 413 AIC: Akaike Information Criterion

52  
53 414 AL: Anja Lindig

54  
55 415 AMOS: Analysis of Moment Structure, Statistical Package for the Social Sciences, International Business  
56  
57 416 Machines Corporation

58  
59 417  $\chi^2$ : Discrepancy chi-squared statistic

60

- 1  
2  
3 418 Chi2/df: Normed chi-squared statistic  
4  
5 419 CFI: Confirmatory fit index  
6  
7 420 CS: Christopher M. Shea  
8  
9 421 Df: Degree of freedom  
10  
11 422 DF: Dominick Frosch  
12  
13 423 EC: Eva Christalle  
14  
15 424 HCP: Healthcare professional  
16  
17 425 IS: Isabelle Scholl  
18  
19 426 KMO: Kaiser-Meyer-Olkin criterion  
20  
21 427 MM: Marcel Machalski  
22  
23 428 MR: Mélanie Ruest  
24  
25 429 ORIC: Organizational Readiness for Implementing Change  
26  
27 430 PH: Pola Hahlweg  
28  
29 431 PNFI: Parsimonious Normed Fit Index  
30  
31 432 RMSEA: Root mean square error of approximation  
32  
33 433 SDM: Shared decision-making  
34  
35 434 SPSS: Statistical Package for the Social Sciences, International Business Machines Corporation  
36  
37 435 SZ: Stefan Zeh  
38  
39 436 TLI: Tucker-Lewis Index  
40  
41 437 TRAPD: Translation, Review, Adjudication, Pretesting, Documentation  
42

## 439 **DECLARATIONS**

### 440 **Ethics approval and consent to participate**

441 The study was approved by the Ethics Committee of the Medical Association Hamburg (Germany, study  
442 ID PV5368). The study was carried out in accordance to the latest version of the Helsinki Declaration of the  
443 World Medical Association. Principles of good clinical practice were respected. Data protection  
444 requirements were met. Study participation was voluntary. A waiver of consent for HCPs was obtained from  
445 the Ethics Committee, as proposed by current statements on ethical designs of implementation research  
446 [77]. HCPs were able to decline participation in the study.

447  
58  
59  
60

1  
2  
3 448 **Funding**

4  
5 449 This study is funded by the German Research Foundation (Deutsche Forschungsgemeinschaft, grant  
6  
7 450 number 232160533).

8  
9 451  
10  
11 452 **Competing interests**  
12  
13 453 PH gave one scientific presentation on shared decision-making during a lunch symposium, for which she  
14  
15 454 received compensation and travel compensation from GlaxoSmithKline GmbH in 2018. AL, EC and IS  
16  
17 455 declared to not have any competing interests.

18 456  
19  
20 457 **Author contributions**  
21  
22 458 AL, PH and IS made substantial contributions to the design and preparation of the study. AL and PH  
23  
24 459 collected the data. AL conducted the analysis in collaboration with EC. All authors contributed to the  
25  
26 460 interpretation of results. AL drafted the manuscript and PH, IS and EC were involved in critically revising  
27  
28 461 the manuscript for important intellectual content. All authors gave final approval of the version to be  
29  
30 462 published.

31 463  
32  
33 464 **Checklist for reporting statement**  
34  
35 465 To report the results of this validation study, we used the Authors' Guidelines for Reporting Scale  
36  
37 466 Development and Validation Results by Cabrera-Nguyen.

38  
39 467  
40  
41 468 **Patient consent form**  
42  
43 469 Not applicable

44  
45 470  
46  
47 471 **Data sharing statement**  
48  
49 472 The dataset collected and analyzed during this study is available from the corresponding author on  
50  
51 473 reasonable request.

52 474  
53  
54 475 **Acknowledgements**  
55  
56 476 We thank our student assistants Anastasia Izotova, Sophia Schulte and Nicolai Pergande for their help  
57  
58 477 preparing the study and the analysis. We thank Stefan Zeh for his part the team translation process. We  
59  
60

1  
2  
3 478 thank Dominick Frosch, Anne Haugstvedt, Marcel Machalski, Mélanie Ruest and Christopher M. Shea for  
4  
5 479 helpful comments and suggestions in the translation and adaptation process of item 10. We also would like  
6  
7 480 to thank Christopher M. Shea for giving the opportunity to translate the ORIC into German and to use it in  
8  
9 481 our implementation study.

10 482

### 11 483 **Supplementary Files**

12  
13  
14 484 Supplementary File 1: Reporting Checklist: Authors Guidelines for Reporting Scale Development and  
15  
16 485 Validation Results

17  
18 486 Supplementary File 2: Additional tables for psychometric evaluation of the 10-item ORIC version

19  
20 487 Supplementary File 3: Organizational Readiness for Implementing Change (ORIC) – German version

21  
22 488 Supplementary File 4: Confirmatory factor analysis model of the 10-item German ORIC

23  
24 489 Supplementary File 5: Results of psychometric evaluation of the 9-item German ORIC version

25  
26 490

### 27 491 **REFERENCES**

28  
29  
30 492 1. Øvretveit J, Andreen-Sachs M, Carlsson J, Gustafsson H, Hansson J, Keller C, et al. Implementing  
31  
32 493 organisation and management innovations in Swedish healthcare. *J Health Organ Manag* 2012;26:237–  
33  
34 494 57.

35  
36 495 2. Montgomery A, Doulougeri K, Panagopoulou E. Implementing action research in hospital settings: a  
37  
38 496 systematic review. *J Health Organ Manag* 2015;29:729–49.

39  
40 497 3. Rye CB, Kimberly JR. The Adoption of Innovations by Provider Organizations in Health Care. *Med*  
41  
42 498 *Care Res Rev* 2007;64:235–78.

43  
44 499 4. Bazzoli GJ, Dynan L, Burns LR, Yap C. Two Decades of Organizational Change in Health Care: What  
45  
46 500 Have we Learned? *Med Care Res Rev* 2004;61:247–331.

47  
48 501 5. Weiner BJ, Amick H, Lee S-YD. Conceptualization and measurement of organizational readiness for  
49  
50 502 change: a review of the literature in health services research and other fields. *Med Care Res Rev*  
51  
52 503 2008;65:379–436.

53  
54 504 6. Batras D, Duff C, Smith BJ. Organizational change theory: Implications for health promotion practice.  
55  
56 505 *Health Promot Int* 2016;31(1):231–41.

57  
58 506 7. Yazdani A, Wells R. Barriers for implementation of successful change to prevent musculoskeletal  
59  
60 507 disorders and how to systematically address them. *Appl Ergon* 2018;73:122–40.

- 1  
2  
3 508 8. Schelvis RMC, Wiezer NM, Blatter BM, van Genabeek JAGM, Oude Hengel KM, Bohlmeijer ET, et al.  
4  
5 509 Evaluating the implementation process of a participatory organizational level occupational health  
6  
7 510 intervention in schools. *BMC Public Health* 2016;16:1212.
- 8  
9 511 9. Scott DAH, Grant SM. A meta-ethnography of the facilitators and barriers to successful implementation  
10  
11 512 of patient complaints processes in health-care settings. *Heal Expect* 2018;21:508–17.
- 12  
13 513 10. Williams B, Perillo S, Brown T. What are the factors of organisational culture in health care settings  
14  
15 514 that act as barriers to the implementation of evidence-based practice? A scoping review. *Nurse Educ*  
16  
17 515 *Today* 2015;35:e34–41.
- 18  
19 516 11. Härter M, Dirmaier J, Scholl I, Donner-Banzhoff N, Dierks M-L, Eich W, et al. The long way of  
20  
21 517 implementing patient-centered care and shared decision making in Germany. *Z Evid Fortbild Qual*  
22  
23 518 *Gesundhwes* 2017;123–124:46–51.
- 24  
25 519 12. Bieber C, Loh A, Ringel N, Eich W, Härter M. Patientenbeteiligung bei medizinischen  
26  
27 520 Entscheidungen. Manual zur partizipativen Entscheidungsfindung (Shared Decision-Making). Freiburg:  
28  
29 521 Universitätsklinikum Freiburg; 2007.
- 30  
31 522 13. Härter M, Buchholz A, Nicolai J, Reuter K, Komarahadi F, Kriston L, et al. Shared decision making  
32  
33 523 and the use of decision aids. *Dtsch Arztebl Int* 2015;112:672–9.
- 34  
35 524 14. Salzburg Global Seminar. Salzburg statement on shared decision making. *BMJ* 2011;342:1745.
- 36  
37 525 15. Reuter K, Loh A, Härter M. Patient as partner in oncology - Opportunities for shared decision-making.  
38  
39 526 In: Koch U, Weis J, eds. Psychoonkologie - Eine Disziplin in der Entwicklung. Göttingen: Hogrefe;  
40  
41 527 2009:131–45.
- 42  
43 528 16. Hahlweg P, Kriston L, Scholl I, Brähler E, Faller H, Schulz H, et al. Cancer patients' preferred and  
44  
45 529 perceived level of involvement in treatment decision-making. [submitted]
- 46  
47 530 17. Hauser K, Koerfer A, Kuhr K, Albus C, Herzig S, Matthes J. Outcome-relevant effects of shared  
48  
49 531 decision making. *Dtsch Arztebl Int* 2015;112:665–71.
- 50  
51 532 18. Shay LA, Lafata JE. Where is the evidence? A systematic review of shared decision making and  
52  
53 533 patient outcomes. *Med Decis Mak* 2015;35:114–31.
- 54  
55 534 19. Härter M, Müller H, Dirmaier J, Donner-Banzhoff N, Bieber C, Eich W. Patient participation and  
56  
57 535 shared decision making in Germany - History, agents and current transfer to practice. *Z Evid Fortbild*  
58  
59 536 *Qual Gesundhwes* 2011;105:263–70.
- 60  
537 20. Härter M, Moumjid N, Cornuz J, Elwyn G, van der Weijden T. Shared decision making in 2017:

- 1  
2  
3 538 International accomplishments in policy, research and implementation. *Z Evid Fortbild Qual Gesundheitswes*  
4  
5 539 2017;123–124:1–5. A  
6  
7 540 21. Härter M, van der Weijden T, Elwyn G. Policy and practice developments in the implementation of  
8  
9 541 shared decision making: An international perspective. *Z Evid Fortbild Qual Gesundheitswes* 2011;105:229–  
10  
11 542 33.  
12  
13 543 22. Fujimori M, Uchitomi Y. Preferences of Cancer Patients Regarding Communication of Bad News: A  
14  
15 544 Systematic Literature Review. *Jpn J Clin Oncol* 2009;39:201–16.  
16  
17 545 23. Ernst J, Braehler E, Weissflog G. Patient involvement in medical decision making--an overview on  
18  
19 546 patient preferences and impacting factors. *Gesundheitswesen* 2014;76:187–92.  
20  
21 547 24. Chewning B, Bylund CL, Shah B, Arora NK, Gueguen JA, Makoul G. Patient preferences for shared  
22  
23 548 decisions: A systematic review. *Patient Educ Couns* 2012;86:9–18.  
24  
25 549 25. Brom L, Hopmans W, Pasman HR, Timmermans D, Widdershoven G, Onwuteaka-Philipsen B.  
26  
27 550 Congruence between patients' preferred and perceived participation in medical decision-making: A review  
28  
29 551 of the literature. *BMC Med Inform Decis Mak* 2014;14:25.  
30  
31 552 26. Légaré F, Stacey D, Turcotte S, Cossi MJ, Kryworuchko J, Graham ID, et al. Interventions for  
32  
33 553 improving the adoption of shared decision making by healthcare professionals. *Cochrane Database Syst*  
34  
35 554 *Rev* 2014;9:CD006732.  
36  
37 555 27. Légaré F, Witteman HO. Shared decision making: Examining key elements and barriers to adoption  
38  
39 556 into routine clinical practice. *Health Aff* 2013;32:276–84.  
40  
41 557 28. Frosch D, Tietbohl C, Scholl I. Overcoming implementation challenges to advance shared-decision  
42  
43 558 making in routine practice. In: Elwyn G, Thompson R, Edwards A, eds. *Shared Decision Making Health*  
44  
45 559 *Care Achieve Evidence-Based Patient Choice*, 3rd Ed. Oxford: Oxford University Press; 2016.  
46  
47 560 29. Grol R, Wensing M, Eccles M, Davis D. *Improving patient care: The implementation of change in*  
48  
49 561 *health care*. Hoboken (NJ): John Wiley & Sons; 2013.  
50  
51 562 30. Grol R, Grimshaw J. *From best evidence to best practice: Effective implementation of change in*  
52  
53 563 *patients' care*. *Lancet* 2003;362:1225–30.  
54  
55 564 31. Cummings GG, Estabrooks CA, Midodzi WK, Wallin L, Hayduk L. Influence of Organizational  
56  
57 565 Characteristics and Context on Research Utilization. *Nurs Res* 2007;56:S24–39.  
58  
59 566 32. Li S-A, Jeffs L, Barwick M, Stevens B. Organizational contextual features that influence the  
60  
567 implementation of evidence-based practices across healthcare settings: a systematic integrative review.



- 1  
2  
3 568 *Syst Rev* 2018;7:72.
- 4  
5 569 33. Légaré F, Ratté S, Gravel K, Graham ID. Barriers and facilitators to implementing shared decision-  
6  
7 570 making in clinical practice: Update of a systematic review of health professionals' perceptions. *Patient*  
8  
9 571 *Educ Couns* 2008;73:526–35.
- 10  
11 572 34. Frerichs W, Hahlweg P, Müller E, Adis C, Scholl I. Shared decision-making in oncology – a qualitative  
12  
13 573 analysis of healthcare providers' views on current practice. *PLoS One* 2016;11:e0149789.
- 14  
15 574 35. Scholl I, LaRussa A, Hahlweg P, Kobrin S, Elwyn G. Organizational- and system-level characteristics  
16  
17 575 that influence implementation of shared decision-making and strategies to address them - a scoping  
18  
19 576 review. *Implement Sci* 2018;13:40.
- 20  
21 577 36. André B, Sjøvold E. What characterizes the work culture at a hospital unit that successfully  
22  
23 578 implements change - a correlation study. *BMC Health Serv Res* 2017;17:486.
- 24  
25 579 37. Armenakis AA, Harris SG, Mossholder KW. Creating Readiness for Organizational Change. *Hum*  
26  
27 580 *Relations* 1993;46:681–703.
- 28  
29 581 38. Kash BA, Spaulding A, Gamm LD, Johnson C. Leadership, culture, and organizational technologies  
30  
31 582 as absorptive capacity for innovation and transformation in the healthcare sector: A framework for  
32  
33 583 research. *Chang Manag* 2014;13:1–13.
- 34  
35 584 39. Armenakis AA, Harris SG, Mossholder KW. Creating Readiness for Organizational Change. *Hum*  
36  
37 585 *Relations* 1993;46:681–703.
- 38  
39 586 40. Weiner BJ. A theory of organizational readiness for change. *Implement Sci* 2009;4:67.
- 40  
41 587 41. Armenakis AA, Harris SG. Crafting a change message to create transformational readiness. *J Organ*  
42  
43 588 *Chang Manag* 2002;15:169–83.
- 44  
45 589 42. Holt D, Armenakis A, Harris S, Field H. Toward a Comprehensive Definition of Readiness for Change:  
46  
47 590 A Review of Research and Instrumentation. *Res Organ Chang Dev* 2007;16:289–336.
- 48  
49 591 43. Shea CM, Jacobs SR, Esserman DA, Bruce K, Weiner BJ. Organizational readiness for implementing  
50  
51 592 change: A psychometric assessment of a new measure. *Implement Sci* 2014;9:7.
- 52  
53 593 44. Gagnon M-P, Attieh R, Ghandour EK, Légaré F, Ouimet M, Estabrooks CA, et al. A Systematic  
54  
55 594 Review of Instruments to Assess Organizational Readiness for Knowledge Translation in Health Care.  
56  
57 595 Jeyaseelan K, editor. *PLoS One* 2014;9:e114338.
- 58  
59 596 45. Storkholm MH, Mazzocato P, Tessma MK, Savage C. Assessing the reliability and validity of the  
60  
597 Danish version of Organizational Readiness for Implementing Change (ORIC). *Implement Sci*

- 1  
2  
3 598 2018;13:78.  
4  
5 599 46. Ruest M, Leonard G, Thomas A, Desrosiers J, Guay M. French cross-cultural adaptation of the  
6  
7 600 Organizational Readiness for Implementing Change (ORIC). *BMC Health Serv Res* 2019;19:535.  
8  
9 601 47. Alexander JA, Hearld LR. Methods and metrics challenges of delivery-system research. *Implement*  
10  
11 602 *Sci* 2012;7:15.  
12  
13 603 48. Harkness J, Pennell BE, Schoua-Glusberg A. Survey Questionnaire Translation and Assessment. In:  
14  
15 604 Presser S, Rothgeb J, Couper M, Lessler J, Martin E, Martin J, et al., eds. *Methods for Testing and*  
16  
17 605 *Evaluating Survey Questionnaires*. Hoboken (NJ): JohnWiley & Sons; 2004:453–73.  
18  
19 606 49. Forcino RC, Bustamante N, Thompson R, Percac-Lima S, Elwyn G, Pe´rez-Arechaederra D, et al.  
20  
21 607 Developing and Pilot Testing a Spanish Translation of CollaboRATE for Use in the United States. *PLoS*  
22  
23 608 *One* 2016;11:e0168538.  
24  
25 609 50. Epstein J, Osborne RH, Elsworth GR, Beaton DE, Guillemin F. Cross-cultural adaptation of the Health  
26  
27 610 Education Impact Questionnaire: experimental study showed expert committee, not back-translation,  
28  
29 611 added value. *J Clin Epidemiol* 2015;68:360–9.  
30  
31 612 51. Perneger TV, Leplège A, Etter JF. Cross-cultural adaptation of a psychometric instrument: two  
32  
33 613 methods compared. *J Clin Epidemiol* 1999;52:1037–46.  
34  
35 614 52. Ponce NA, Lavarreda SA, Yen W, Brown ER, DiSogra C, Satter DE. The California Health Interview  
36  
37 615 Survey 2001: translation of a major survey for California’s multiethnic population. *Public Heal Rep*  
38  
39 616 2004;119:388–95.  
40  
41 617 53. Mokkink LB, Terwee CB, Patrick DL, Alonso J, Stratford PW, Knol DL, et al. The COSMIN study  
42  
43 618 reached international consensus on taxonomy, terminology, and definitions of measurement properties  
44  
45 619 for health-related patient-reported outcomes. *J Clin Epidemiol* 2010;63:737–45.  
46  
47 620 54. Terwee CB, Prinsen CAC, Chiarotto A, Westerman MJ, Patrick DL, Alonso J, et al. COSMIN  
48  
49 621 methodology for evaluating the content validity of patient-reported outcome measures: a Delphi study.  
50  
51 622 *Qual Life Res* 2018;27:1159–70.  
52  
53 623 55. Willis GB, Research Triangle Institute. *Cognitive interviewing - a “how to” guide*. 1999.  
54  
55 624 56. Scholl I, Hahlweg P, Lindig A, Bokemeyer C, Coym A, Hanken H, et al. Evaluation of a program for  
56  
57 625 routine implementation of shared decision-making in cancer care : study protocol of a stepped wedge  
58  
59 626 cluster randomized trial. *Implement Sci* 2018;1–10.  
60  
61 627 57. Degner LF, Sloan JA, Venkatesh P. The Control Preferences Scale. *Can J Nurs Res* 1997;29:21–43.

- 1  
2  
3 628 58. Giguere A, Carmichael P-C, Coudert L, Renaud J-S, Légaré F, Witteman, H, et al. Development of  
4  
5 629 the IcanSDM scale to assess primary care clinicians' ability to adopt shared decision making. [submitted]  
6  
7 630 59. Hahlweg P, Härter M, Nestoriuc Y, Scholl I. How are decisions made in cancer care? A qualitative  
8  
9 631 study using participant observation of current practice. *BMJ Open* 2017;7:e016360.  
10  
11 632 60. Bannon WJ. Missing data within a quantitative research study: How to assess it, treat it, and why you  
12  
13 633 should care. *J Am Assoc Nurse Pr* 2015;27:230–2.  
14  
15 634 61. Rattray J, Jones MC. Essential elements of questionnaire design and development. *J Clin Nurs*  
16  
17 635 2007;16:234–43.  
18  
19 636 62. Streiner DL, Norman GR. Health measurement scales: A practical guide to their development and  
20  
21 637 use. Oxford, UK: Oxford University Press 2008.  
22  
23 638 63. Fabrigar L, Wegener DT, MacCallum RC, Strahan EJ. Evaluating the use of exploratory factor  
24  
25 639 analysis in psychological research. *Psychol Methods* 1999;4:272.  
26  
27 640 64. Worthington R. Scale development research. *Couns Psychol* 2006;34:806–38.  
28  
29 641 65. O'Connor BP. SPSS and SAS programs for determining the number of components using parallel  
30  
31 642 analysis and Velicer's MAP test. *Behav Res Methods, Instruments, Comput* 2000;23:396–402.  
32  
33 643 66. Hayton JC, David GA, Scarpello V. Factor Retention Decisions in Exploratory Factor Analysis: a  
34  
35 644 Tutorial on Parallel Analysis. *Organ Res Methods*. 2004;7:191–205.  
36  
37 645 67. Zwick WR, Velicer WF. Comparison of five rules for determining the number of components to retain.  
38  
39 646 *Psychol Bull* 1986;99:432–42.  
40  
41 647 68. Schermelleh-Engel K, Moosbrugger H, Müller H. Evaluating the Fit of Structural Equation Models:  
42  
43 648 Tests of Significance and Descriptive Goodness-of-Fit Measures. *Meth Psychol Res Online* 2003;8:23–  
44  
45 649 74.  
46  
47 650 69. Hu L, Bentler P. Cutoff criteria for fit indexes in covariance structure analysis: conventional criteria  
48  
49 651 versus new alternatives. *Struct Eq Model* 1999;6:1–55.  
50  
51 652 70. Hair J, Black W, Babin B, RE Anderson. Multivariate data analysis. Upper Saddle River, NJ: Pearson  
52  
53 653 Prentice Hall; 2009.  
54  
55 654 71. Hooper D, Coughlan J, Mullen M. Structural Equation Modelling: Guidelines for Determining Model  
56  
57 655 Fit. *Articles* 2008.  
58  
59 656 72. McHorney CA, Tarlov AR. Individual-patient monitoring in clinical practice: are available health status  
60  
657 surveys adequate? *Qual Life Res* 1995;4:293–307.

- 1  
2  
3 658 73. Ferketich S. Focus on psychometrics. Aspects of item analysis. *Res Nurs Health* 1991;14:165–8.  
4  
5 659 74. Bannigan K, Watson R. Reliability and validity in a nutshell. *J Clin Nurs* 2009 ;18:3237–43.  
6  
7 660 75. Bentler PM. Comparative fit indexes in structural models. *Psychol Bull* 1990;107:238–46.  
8  
9 661 76. Browne MW, Cudeck R. Single Sample Cross-Validation Indices for Covariance Structures.  
10  
11 662 *Multivariate Behav Res* 1989;24:445–55.  
12  
13 663 77. Hutton J, Eccles M, Grimshaw J. Ethical issues in implementation research: A discussion of the  
14  
15 664 problems in achieving informed consent. *Implement Sci* 2008;3:52.  
16  
17 665

For peer review only

1 **Supplementary File 1: Checklist for reporting standards. Authors' guideline for Scale**2 **Development and validation results by Cabrera-Nguyen.**

|   | <b>Guidelines by Cabrera-Nguyen [1]</b>                                                                                                                                                                                                                                                                                                                                                                                                                                                       | <b>Transfer to our study</b>                                                                                                                                                                                                                                            |
|---|-----------------------------------------------------------------------------------------------------------------------------------------------------------------------------------------------------------------------------------------------------------------------------------------------------------------------------------------------------------------------------------------------------------------------------------------------------------------------------------------------|-------------------------------------------------------------------------------------------------------------------------------------------------------------------------------------------------------------------------------------------------------------------------|
| 1 | Precisely define the target construct.                                                                                                                                                                                                                                                                                                                                                                                                                                                        | See page 3 and 4 (Introduction section)                                                                                                                                                                                                                                 |
| 2 | Justify the need for your new measure. For example, if measures of the construct exist in the literature, explain the value added by your new scale. How might the new measure enhance the substantive knowledge base or social work practice?                                                                                                                                                                                                                                                | See page 4 (Introduction section)                                                                                                                                                                                                                                       |
| 3 | Indicate that you have submitted your initial pool of items to expert review (Worthington & Whittaker, 2006). Report (a) the number of items in the preliminary pool; (b) the number of expert reviewers and their qualifications; and (c) any major changes to your initial item pool following the review (e.g., a substantial decrease in the number of items, changes to the original item response format, overhaul of item pool due to experts' assessment regarding content validity). | See page 5 and 6 (Methods section: Measure, Translation, Assessment of comprehensibility and adaptation of the scale) and page 9 and 10 (Results section: Translation, Assessment of comprehensibility and adaptation of the scale)                                     |
| 4 | Report the name and version of the statistical software package used for all analyses.                                                                                                                                                                                                                                                                                                                                                                                                        | See page 6 to 8 (Methods section: Assessment of comprehensibility and adaptation of the scale, Psychometric evaluation)                                                                                                                                                 |
| 5 | Identify and justify the sampling strategy (e.g., convenience, snowball) and sampling frame. Report standard sample demographic characteristics as well as other salient sample characteristics.                                                                                                                                                                                                                                                                                              | See page 6 and 7 (Methods section: Assessment of comprehensibility and adaptation of the scale, Psychometric evaluation) and page 8 to 10 (Results section: Assessment of comprehensibility and adaptation of the scale, Psychometric evaluation) and Additional file 3 |
| 6 | Discuss relevant data preparation and screening procedures. For instance, do the data meet the appropriate assumptions for factor analysis? If not, what actions were taken? Report tests of factorability if appropriate (e.g., report Bartlett's test of sphericity).                                                                                                                                                                                                                       | See page 10 to 12 (Results section: Psychometric evaluation)                                                                                                                                                                                                            |
| 7 | Provide all dates of data collection.                                                                                                                                                                                                                                                                                                                                                                                                                                                         | See page 9 to 13 (Results section)                                                                                                                                                                                                                                      |
| 8 | Avoid use of principal components analysis (PCA) as a precursor to CFA (Costello & Osborne, 2005; Worthington & Whittaker, 2006). Instead, start with EFA to assess the underlying factor structure and refine the item pool. EFA should be followed by CFA using a different sample (or samples) to evaluate the EFA-informed a priori theory about the measure's factor-structure and psychometric                                                                                          | An a priori hypothesized model for CFA was specified based on the original measures structure. The model could not be confirmed and an EFA was calculated afterwards. The same data set was used for                                                                    |

|   |                                                                                                                                                                                                                                                                                                                                                                                                                                                                                                                                                                                                                                                                                                                                                                                                                                                                                                                                                                                                                                                                                                                                                                                                                                                                                                                                                                                                                                                                                                                                                                                                                                                                                                                                                                                                                                                                                                                                                                                                                                                                                                                                                                                                                                                                                                                                                                                                                                                                                                                                                                                                                                                                                                                                                                                                                                                                                                                                                                  |                                                                                                                                                                                                                                                                                                                                                                                                                                                                                 |
|---|------------------------------------------------------------------------------------------------------------------------------------------------------------------------------------------------------------------------------------------------------------------------------------------------------------------------------------------------------------------------------------------------------------------------------------------------------------------------------------------------------------------------------------------------------------------------------------------------------------------------------------------------------------------------------------------------------------------------------------------------------------------------------------------------------------------------------------------------------------------------------------------------------------------------------------------------------------------------------------------------------------------------------------------------------------------------------------------------------------------------------------------------------------------------------------------------------------------------------------------------------------------------------------------------------------------------------------------------------------------------------------------------------------------------------------------------------------------------------------------------------------------------------------------------------------------------------------------------------------------------------------------------------------------------------------------------------------------------------------------------------------------------------------------------------------------------------------------------------------------------------------------------------------------------------------------------------------------------------------------------------------------------------------------------------------------------------------------------------------------------------------------------------------------------------------------------------------------------------------------------------------------------------------------------------------------------------------------------------------------------------------------------------------------------------------------------------------------------------------------------------------------------------------------------------------------------------------------------------------------------------------------------------------------------------------------------------------------------------------------------------------------------------------------------------------------------------------------------------------------------------------------------------------------------------------------------------------------|---------------------------------------------------------------------------------------------------------------------------------------------------------------------------------------------------------------------------------------------------------------------------------------------------------------------------------------------------------------------------------------------------------------------------------------------------------------------------------|
|   | properties. (Costello & Osborne, 2005; Henson & Roberts, 2006; Worthington & Whittaker, 2006). For CFA, authors should specify an a priori hypothesized model and a priori competing models (Jackson, Gillasp, & Purc-Stephenson, 2009).                                                                                                                                                                                                                                                                                                                                                                                                                                                                                                                                                                                                                                                                                                                                                                                                                                                                                                                                                                                                                                                                                                                                                                                                                                                                                                                                                                                                                                                                                                                                                                                                                                                                                                                                                                                                                                                                                                                                                                                                                                                                                                                                                                                                                                                                                                                                                                                                                                                                                                                                                                                                                                                                                                                         | EFA and CFA. For more information see page 10 to 12 (Results section).                                                                                                                                                                                                                                                                                                                                                                                                          |
| 9 | <p>Guidelines for reporting EFA results.</p> <p>How large is a sample? One common rule of thumb is to ensure a person-to-item ratio of 10:1. Another rule of thumb is that <math>N = 300</math> is usually acceptable (Worthington &amp; Whittaker, 2006). However, some researchers have criticized these sample size rules of thumb, noting the appropriate sample size is dependent on the features of the gathered data. These researchers recommend obtaining the largest possible sample because the adequacy of the sample size cannot be determined until after the data have been analyzed (Henson &amp; Roberts, 2006).</p> <p>Run EFA . . . or not. Run a preliminary EFA to determine if further data collection is required based on the following criteria: (a) If communalities are greater than .50 or there are 10:1 items per factor with factor loadings of roughly .4, then a sample size of 150 to 200 is likely to be adequate; (b) If communalities are all at least .60 or there are a minimum of 4:1 items per factor with factor loadings above .6, then even smaller sample sizes may suffice; (Worthington &amp; Whittaker, 2006). Report if additional data collection was necessary due to inadequate sample size. If so, report the new participants' sociodemographic characteristics and test for differences between groups using standard statistical procedures (e.g., t-tests).</p> <p>Give EFA details. Report the specific rotation strategy used (e.g. varimax, geomin). Justify the decision to use an orthogonal or oblique solution. One recommendation is to always begin with an oblique rotation, empirically assess factor intercorrelations, and report them before deciding upon a final rotation solution (Henson &amp; Roberts, 2006; Worthington &amp; Whittaker, 2006). Some researchers argue oblique rotation is always the best approach because (a) factor intercorrelations are the norm in social sciences and (b) both approaches yield the same result if the factors happen to be uncorrelated (Costello &amp; Osborne, 2005). Conversely, other researchers contend that orthogonal rotation is preferable because fewer parameters are estimated—orthogonal rotation is more parsimonious and amenable to replication (Henson &amp; Roberts, 2006). Similarly, some researchers warn against relying on a statistical software package's default settings to determine the appropriate type of oblique rotation (Henson &amp; Roberts, 2006; Worthington &amp; Whittaker, 2006). Others state that doing so is fine (Costello &amp; Osborne, 2005, p.3). Given the lack of consensus, it is probably best to describe what you do and defend your approach on substantive grounds, if possible.</p> <p>Report the whole factor pattern/structure. Always report the whole factor pattern/structure matrix, including all of the items in the analysis. It is recommended that authors report</p> | <p>Sample size is <math>n=115</math>, person-to-item ratio 11.5:1 (see page 7: Methods section, Psychometric analysis)</p> <p>EFA communalities are all above .70, therefore the sample size of <math>n=115</math> can be determined as adequate and no additional data collection was necessary. For more information, see Supplementary File1).</p> <p>See page 6 to 8 (Methods section: Psychometric evaluation)</p> <p>See page 10 to 12 (Results section: Psychometric</p> |

|    |                                                                                                                                                                                                                                                                                                                                                                                                                                                                                    |                                                                                                                                                                                                                        |
|----|------------------------------------------------------------------------------------------------------------------------------------------------------------------------------------------------------------------------------------------------------------------------------------------------------------------------------------------------------------------------------------------------------------------------------------------------------------------------------------|------------------------------------------------------------------------------------------------------------------------------------------------------------------------------------------------------------------------|
|    | <p>this information in a chart following the example provided by Henson and Roberts (2006) on page 411.</p>                                                                                                                                                                                                                                                                                                                                                                        | <p>evaluation) and Supplementary File 1</p>                                                                                                                                                                            |
|    | <p>Criteria for deleting (crossloaded) items. Report any deleted items and the criteria used for deletion. Crossloading items with values <math>\geq .32</math> on at least two factors should generally be candidates for deletion, especially if there are other items with factor loadings of .50 or greater (Costello &amp; Osborne, 2005). Rerun the EFA each time an item is deleted.</p>                                                                                    | <p>No crossloading items could be observed, so item deletion was not necessary.</p>                                                                                                                                    |
|    | <p>Criteria for number of factors. Report the number of factors retained and justify this decision using multiple criteria (eigenvalue <math>&gt; 1</math>, scree test, parallel analysis, rejection of a factor with fewer than 3 items, etc). Reporting the eigenvalue <math>&gt; 1</math> rule alone is inadequate because it has been shown to among the least accurate criteria for assessing factor retention (Costello &amp; Osborne, 2005; Henson &amp; Roberts, 2006)</p> | <p>See page 6 to 8 (Methods section: Psychometric evaluation)</p>                                                                                                                                                      |
|    | <p>Explained variance. Report the variance explained by the factors.</p>                                                                                                                                                                                                                                                                                                                                                                                                           | <p>See page 10 to 12 (Results section: Psychometric evaluation) and Supplementary File 1</p>                                                                                                                           |
|    | <p>In general, describe your decisions.</p>                                                                                                                                                                                                                                                                                                                                                                                                                                        | <p>See page 10 to 12 (Results section: Psychometric evaluation) and Supplementary File 1</p>                                                                                                                           |
| 10 | <p>Guidelines for reporting CFA results.</p>                                                                                                                                                                                                                                                                                                                                                                                                                                       |                                                                                                                                                                                                                        |
|    | <p>Describe and justify the theoretical model. Report hypothesized factor structure. Provide theoretical and empirical justification (e.g., results of preliminary EFAs) for your hypothesis. In addition, report a priori competing models.</p>                                                                                                                                                                                                                                   | <p>See page 6 to 8 (Methods section: Psychometric evaluation)</p>                                                                                                                                                      |
|    | <p>Describe the parameterization. Provide a comprehensive description of the a priori parameter specification. Identify fixed parameters, free parameters, and constrained parameters. For example, indicate if you freed the errors of any items to correlate.</p>                                                                                                                                                                                                                | <p>One factor loading was constrained to equal 1, the corresponding intercept was constrained equal to zero. The other factor loadings and intercepts were estimated. Errors of items were not freed to correlate.</p> |
|    | <p>Include a figure. Include a figure of each CFA model being tested using Kline's (2005) graphical conventions if feasible.</p>                                                                                                                                                                                                                                                                                                                                                   | <p>See Supplementary File 3</p>                                                                                                                                                                                        |
|    | <p>Identification. Demonstrate model identification (e.g., <math>df &gt; 0</math>; scaling of factors; assess and report the —t-rule; the two-indicator rule). Necessary and sufficient conditions for model identification may vary for certain types of CFA models. When in doubt, authors should consult Brown's (2006) CFA text or Kline's (2005) SEM text for guidance.</p>                                                                                                   | <p>See page 10 to 12 (Results section: Psychometric evaluation)</p>                                                                                                                                                    |
|    | <p>Select an estimator based on distributional patterns and assumptions. Report the estimator used (e.g., ML,</p>                                                                                                                                                                                                                                                                                                                                                                  | <p>See page 6 (Methods section: Psychometric evaluation)</p>                                                                                                                                                           |

|    |                                                                                                                                                                                                                                                                                                                                                                                                                                                                                                                                                                                             |                                                                                                                     |
|----|---------------------------------------------------------------------------------------------------------------------------------------------------------------------------------------------------------------------------------------------------------------------------------------------------------------------------------------------------------------------------------------------------------------------------------------------------------------------------------------------------------------------------------------------------------------------------------------------|---------------------------------------------------------------------------------------------------------------------|
|    | WLSMV) and justify your choice based on distributional assumptions. It is not appropriate to report that you relied on your statistical software's default setting.                                                                                                                                                                                                                                                                                                                                                                                                                         |                                                                                                                     |
|    | Use multiple fit indices. After estimating a model, always report multiple fit indices (e.g., model X <sup>2</sup> , df, p, CFI/TLI, RMSEA, SRMR). Report all appropriate fit indices, not just those favorable to your hypotheses (Jackson et al., 2009). For example, do not report acceptable CFI and TLI scores while omitting a relevant fit index with a suboptimal value.                                                                                                                                                                                                            | See page 8 (Methods section: Psychometric evaluation) and page 10 and 11 (Results section: Psychometric evaluation) |
|    | What is acceptable fit? For model fit indices, authors should generally use the cut-off values recommended by Hu and Bentler (1999) and endorsed by Brown (2006), assuming ML estimation: a. CFI/TLI ≥ .95 b. RMSEA ≤ .06 c. SRMR ≤ .08                                                                                                                                                                                                                                                                                                                                                     | See page 9, Table 1 (Methods section: Psychometric evaluation)                                                      |
|    | Localized strain? When reporting model fit, include an assessment for localized areas of strain by examining standardized residuals. Standardized residuals greater than 1.96 (for p < .05) indicate areas of strain (Harrington, 2009). Report the absence of localized strain, if appropriate; otherwise, note localized areas of strain by reporting the relevant standardized residuals.                                                                                                                                                                                                | Standardized residuals do not indicate localized strains.                                                           |
|    | Parameter estimates and SEs. When reporting factor loadings and other parameter estimates, always report the unstandardized estimates, their p values, and the standard errors. In addition, include the standardized estimates when appropriate. Be sure to report all parameter estimates, even those that are non significant (Brown, 2006; Jackson et al., 2009).                                                                                                                                                                                                                       | See Supplementary File 3                                                                                            |
|    | Assessing the validity of the factor solution. Comment on the new measure's convergent and discriminant validity based on parameter estimates. For instance, factor correlations ≥ .80 may indicate poor discriminant validity (Brown, 2006). In addition, strong factor loadings that do not crossload may indicate good convergent validity. One rule of thumb is that factor loadings < .40 are weak and factor loadings ≥ .60 are strong (Garson, 2010).                                                                                                                                | Exploratory factor analysis revealed a one-factor model, so there are no factor correlations.                       |
|    | Other measures. Report squared multiple correlations and comment on the measure's reliability (e.g., report Raykov's Rho if appropriate)                                                                                                                                                                                                                                                                                                                                                                                                                                                    | See page 10 to 12 (Results section: Psychometric analysis)                                                          |
|    | Respecification: Caution! Report any post-hoc respecifications to improve model fit based on modification indices. Justify the respecifications on theoretical or conceptual grounds (Jackson et al., 2009). Respecification to allow for correlated errors is not supportable without strong pragmatic justification (e.g., items contain similar words or phrases). Note that respecification precludes comparing the model with your a priori specified competing models. Report improvements in appropriate model fit indices for respecified models (e.g., chi-square difference test) | No respecifications to improve model fit were applied.                                                              |
| 10 | Describe the matrix (or matrices) you analyzed (e.g., covariance, correlation). Include matrices in the manuscript                                                                                                                                                                                                                                                                                                                                                                                                                                                                          | See Supplementary File 1                                                                                            |



|    |                                                                                                                                                                                                                                                                                                                                                                                                                                                                     |                                                                                                              |
|----|---------------------------------------------------------------------------------------------------------------------------------------------------------------------------------------------------------------------------------------------------------------------------------------------------------------------------------------------------------------------------------------------------------------------------------------------------------------------|--------------------------------------------------------------------------------------------------------------|
|    | if feasible; otherwise, indicate these data are available upon request.                                                                                                                                                                                                                                                                                                                                                                                             |                                                                                                              |
| 11 | Report the amount of missing data and describe how missing data were handled. For a review of practices for handling missing data, see Sterne and colleagues (2009), Rose and Fraser (2008), and Horton and Kleinman (2007). Provide a rationale for your approach to handling missing data. Authors are encouraged to consider using multiple imputation or model estimation with full-information maximum likelihood (FIML; Rose & Fraser, 2008).                 | See page 7 (Methods section: Psychometric evaluation) and page 10 (Results section: Psychometric evaluation) |
| 12 | Compare your CFA model with the alternative or competing models. Do competing models fit the data better or worse than your model (e.g., does your four-factor model of acculturation fit the data better than a two-factor model or a one-factor model)? Identify the preferable model based on appropriate fit statistics (e.g. chi-square difference test for nested models, Akaike information criterion for non-nested models), parsimony, and relevant theory | See page 15 and 16 (Discussions sections)                                                                    |
| 13 | Include your scale (items and response options) in an appendix.                                                                                                                                                                                                                                                                                                                                                                                                     | See Supplementary File 2                                                                                     |
| 14 | Report how methodological limitations may have impacted findings regarding your measure's psychometric properties (e.g., note potential repercussions of suboptimal sampling techniques, discuss implications of using listwise deletion to handle missing data instead of multiple imputation or FIML).                                                                                                                                                            | See page 16 and 17 (Discussions sections)                                                                    |
| 15 | Discuss directions for future research (e.g., if appropriate, testing your scale for measurement invariance by conducting CFA on different populations).                                                                                                                                                                                                                                                                                                            | See page 16 and 17 (Discussions sections)                                                                    |

1 Cabrera-Nguyen P. Author Guidelines for Reporting Scale Development and Validation Results in the *J Soc Social Work Res* 2010;1:99–103.

1  
2  
3 **1 Supplementary File 2: Additional tables for psychometric evaluation of 10-item ORIC version**  
4  
5  
6

2

3 Table A: Demographic data of participants of cognitive interviews (n=11).  
4  
5

|                                   |                  | Frequencies<br>for n=11 |
|-----------------------------------|------------------|-------------------------|
| Age                               | < 30 years       | 1                       |
|                                   | 31-40 years      | 3                       |
|                                   | 41-50 years      | 3                       |
|                                   | > 50 years       | 4                       |
| Gender                            | Female           | 9                       |
|                                   | Male             | 2                       |
| Profession*                       | Nurse            | 8                       |
|                                   | Physician        | 2                       |
|                                   | Psychooncologist | 3                       |
| Work experience in<br>health care | > 5 years        | 3                       |
|                                   | 5-10 years       | 4                       |
|                                   | 11-20 years      | 3                       |
|                                   | > 20 years       | 1                       |

4 \* multiple answers possible  
5  
6

6 Table B: Factor loadings on the first component.  
7  
8

|         | Component 1 |
|---------|-------------|
| Item 1  | 0.790       |
| Item 2  | 0.788       |
| Item 3  | 0.833       |
| Item 4  | 0.846       |
| Item 5  | 0.831       |
| Item 6  | 0.851       |
| Item 7  | 0.839       |
| Item 8  | 0.800       |
| Item 9  | 0.754       |
| Item 10 | 0.860       |

7 For EFA, the sample was split and n=115.  
8  
9

9 Table C: Inter-item correlation matrix for the German ORIC.  
10

|         | Item 1 | Item 2 | Item 3 | Item 4 | Item 5 | Item 6 | Item 7 | Item 8 | Item 9 | Item 10 |
|---------|--------|--------|--------|--------|--------|--------|--------|--------|--------|---------|
| Item 1  | 1.000  | .634   | .650   | .611   | .652   | .587   | .558   | .538   | .507   | .542    |
| Item 2  | .634   | 1.000  | .586   | .681   | .607   | .518   | .504   | .485   | .434   | .478    |
| Item 3  | .650   | .586   | 1.000  | .673   | .723   | .636   | .600   | .558   | .492   | .560    |
| Item 4  | .611   | .681   | .673   | 1.000  | .675   | .588   | .531   | .541   | .512   | .551    |
| Item 5  | .652   | .607   | .723   | .675   | 1.000  | .622   | .621   | .466   | .474   | .578    |
| Item 6  | .587   | .518   | .636   | .588   | .622   | 1.000  | .677   | .590   | .588   | .573    |
| Item 7  | .558   | .504   | .600   | .531   | .621   | .677   | 1.000  | .612   | .491   | .567    |
| Item 8  | .538   | .485   | .558   | .541   | .466   | .590   | .612   | 1.000  | .611   | .560    |
| Item 9  | .507   | .434   | .492   | .512   | .474   | .588   | .491   | .611   | 1.000  | .659    |
| Item 10 | .542   | .478   | .560   | .551   | .578   | .573   | .567   | .560   | .659   | 1.000   |

1  
2  
3 **1 Supplementary File 3: Organizational Readiness for Implementing Change (ORIC) – German**  
4 **2 version**  
5  
6  
7  
8  
9  
10  
11

12  
13  
14  
15  
16  
17  
18  
19  
20  
21  
22  
23  
24  
25  
26  
27  
28  
29  
30  
31  
32  
33  
34  
35  
36  
37  
38  
39  
40  
41  
42  
43  
44  
45  
46  
47  
48  
49  
50  
51  
52  
53  
54  
55  
56  
57  
58  
59  
60

Bitte geben Sie an, wie sehr Sie den folgenden Aussagen zur Umsetzung von partizipativer Entscheidungsfindung an Ihrem aktuellen Arbeitsplatz zustimmen. Falls partizipative Entscheidungsfindung aktuell nicht umgesetzt wird, wie wäre es im Falle der Umsetzung?

|    |                                                                                                                                                                       | stimme<br>nicht<br>zu    | stimme<br>eher<br>nicht<br>zu | teils<br>teils           | stimme<br>eher<br>zu     | stimme<br>zu             |
|----|-----------------------------------------------------------------------------------------------------------------------------------------------------------------------|--------------------------|-------------------------------|--------------------------|--------------------------|--------------------------|
| 1  | Personen, die hier arbeiten, zeigen hohes Engagement bei der Umsetzung von partizipativer Entscheidungsfindung.                                                       | <input type="checkbox"/> | <input type="checkbox"/>      | <input type="checkbox"/> | <input type="checkbox"/> | <input type="checkbox"/> |
| 2  | Personen, die hier arbeiten, werden tun, was auch immer nötig ist, um partizipative Entscheidungsfindung umzusetzen.                                                  | <input type="checkbox"/> | <input type="checkbox"/>      | <input type="checkbox"/> | <input type="checkbox"/> | <input type="checkbox"/> |
| 3  | Personen, die hier arbeiten, wollen partizipative Entscheidungsfindung umsetzen.                                                                                      | <input type="checkbox"/> | <input type="checkbox"/>      | <input type="checkbox"/> | <input type="checkbox"/> | <input type="checkbox"/> |
| 4  | Personen, die hier arbeiten, sind fest entschlossen, partizipative Entscheidungsfindung umzusetzen.                                                                   | <input type="checkbox"/> | <input type="checkbox"/>      | <input type="checkbox"/> | <input type="checkbox"/> | <input type="checkbox"/> |
| 5  | Personen, die hier arbeiten, sind motiviert, partizipative Entscheidungsfindung umzusetzen.                                                                           | <input type="checkbox"/> | <input type="checkbox"/>      | <input type="checkbox"/> | <input type="checkbox"/> | <input type="checkbox"/> |
| 6  | Eventuell entstehen bei der Umsetzung von partizipativer Entscheidungsfindung Herausforderungen. Personen, die hier arbeiten, sind zuversichtlich, diese zu meistern. | <input type="checkbox"/> | <input type="checkbox"/>      | <input type="checkbox"/> | <input type="checkbox"/> | <input type="checkbox"/> |
| 7  | Personen, die hier arbeiten, sind zuversichtlich, dass sie den Verlauf der Umsetzung von partizipativer Entscheidungsfindung überblicken können.                      | <input type="checkbox"/> | <input type="checkbox"/>      | <input type="checkbox"/> | <input type="checkbox"/> | <input type="checkbox"/> |
| 8  | Personen, die hier arbeiten, sind zuversichtlich, dass sie Aufgaben so koordinieren können, dass die Umsetzung reibungslos abläuft.                                   | <input type="checkbox"/> | <input type="checkbox"/>      | <input type="checkbox"/> | <input type="checkbox"/> | <input type="checkbox"/> |
| 9  | Personen, die hier arbeiten, sind zuversichtlich, dass die Klinik sie dabei unterstützen kann, partizipative Entscheidungsfindung umzusetzen.                         | <input type="checkbox"/> | <input type="checkbox"/>      | <input type="checkbox"/> | <input type="checkbox"/> | <input type="checkbox"/> |
| 10 | Personen, die hier arbeiten, sind zuversichtlich, Machenschaften bei der Umsetzung von partizipativer Entscheidungsfindung bewältigen zu können.                      | <input type="checkbox"/> | <input type="checkbox"/>      | <input type="checkbox"/> | <input type="checkbox"/> | <input type="checkbox"/> |

Supplementary File 4: Confirmatory factor analysis model of the 10-item German ORIC

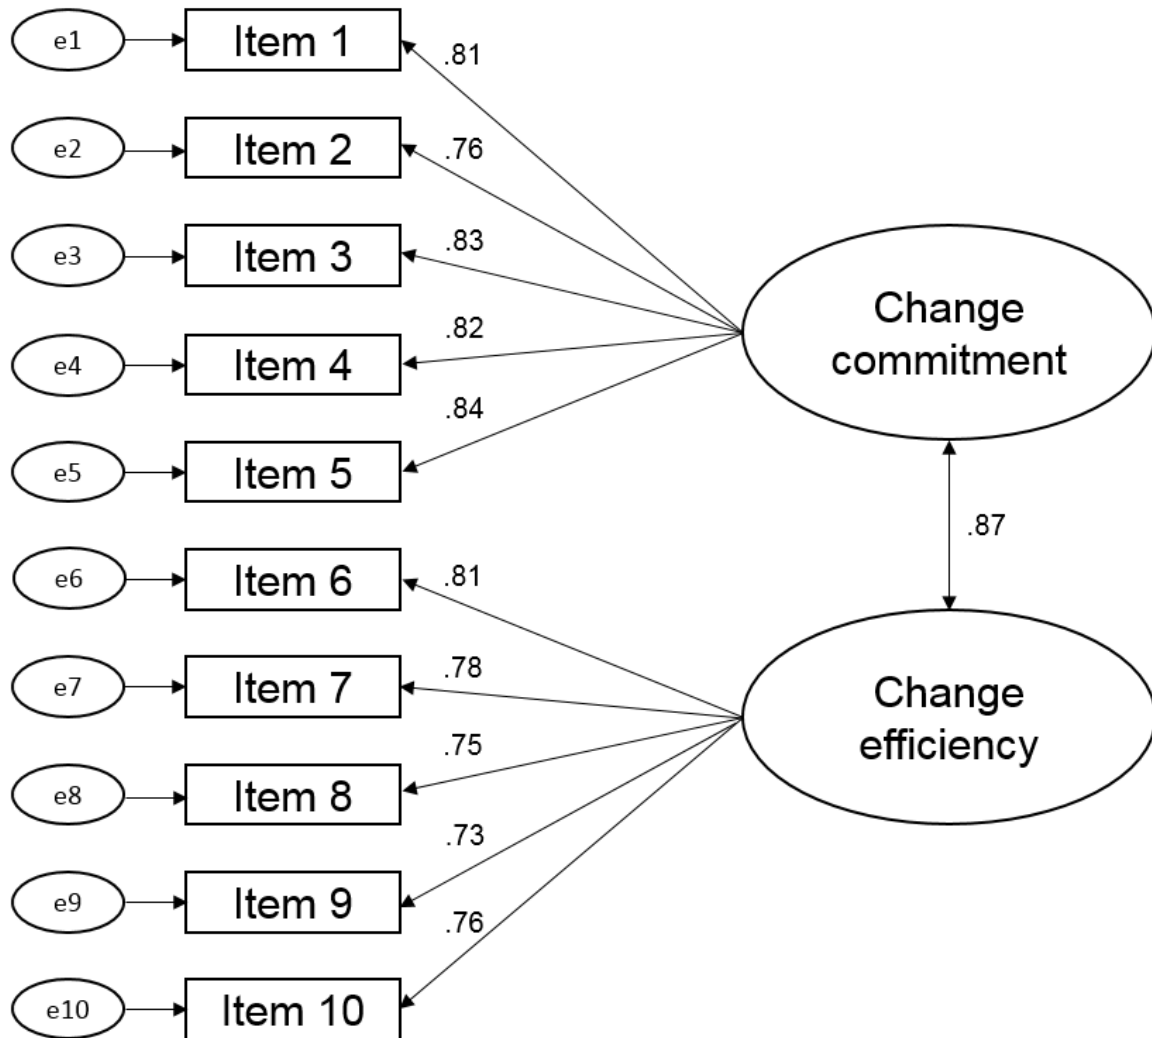

1  
2  
3 **1 Supplementary File 5: Results of psychometric evaluation of the 9-item German ORIC version:**  
4  
5 **2 Factor analysis, corrected item-total correlations, Cronbach's  $\alpha$**   
6  
7  
8  
9

10  
11  
12  
13  
14  
15  
16  
17  
18  
19  
20  
21  
22  
23  
24  
25  
26  
27  
28  
29  
30  
31  
32  
33  
34  
35  
36  
37  
38  
39  
40  
41  
42  
43  
44  
45  
46  
47  
48  
49  
50  
51  
52  
53  
54  
55  
56  
57  
58  
59  
60

4 **Factor analysis**

To get information about the factorial structure of the 9-item German ORIC, an exploratory factor analysis was conducted. KMO measure was .926 and Barlett's test of sphericity was significant ( $X^2 = 1302.78, p < .001$ ), indicating that a factor analysis of the data was appropriate to observe data. Table A shows results of the exploratory factor analysis. Since the main component explains 66% of the variance, a one-factor model could be assumed. The factor loading for the first component can be observed in table B.

Table A: Results of exploratory factor analysis of the 9-item German ORIC with oblique rotation and parallel analysis: eigenvalues of the ten components of the German ORIC and eigenvalues for corresponding random data.

|             | Eigenvalue |               |              | Eigenvalues for random data |                |
|-------------|------------|---------------|--------------|-----------------------------|----------------|
|             | Total      | % of variance | Cumulative % | Means                       | 95% percentile |
| Component 1 | 6.02       | 66.85         | 66.85        | 1.45                        | 1.59           |
| Component 2 | 0.802      | 8.91          | 75.76        | 1.29                        | 1.39           |
| Component 3 | 0.472      | 5.25          | 81.01        | 1.17                        | 1.25           |
| Component 4 | 0.392      | 4.35          | 85.37        | 1.07                        | 1.14           |
| Component 5 | 0.366      | 4.06          | 89.43        | 0.98                        | 1.05           |
| Component 6 | 0.304      | 3.38          | 92.81        | 0.89                        | 0.96           |
| Component 7 | 0.250      | 2.78          | 95.59        | 0.81                        | 0.87           |
| Component 8 | 0.232      | 2.57          | 98.16        | 0.71                        | 0.79           |
| Component 9 | 0.165      | 1.84          | 100.00       | 0.61                        | 0.69           |

Notes: For EFA, half of the data set (n=115) was used.

Table B: Factor loadings on the first component.

|        | Component 1 |
|--------|-------------|
| Item 1 | 0.860       |
| Item 2 | 0.856       |
| Item 3 | 0.837       |
| Item 4 | 0.836       |
| Item 5 | 0.835       |
| Item 6 | 0.799       |
| Item 7 | 0.797       |
| Item 8 | 0.791       |
| Item 9 | 0.739       |

Notes: For EFA, the sample was split and n=115.

19 A confirmatory factor analysis was performed with the one-factor model to analyze its fit indices. Indices  
20 of the one-factor model are presented in table C.

22 Table C: Fit indices of the one-factor model of the 9-item German ORIC.

|                  | Chi <sup>2</sup> <sup>1</sup> | df <sup>2</sup> | Chi <sup>2</sup> /df <sup>3</sup> | CFI <sup>4</sup> | TLI <sup>5</sup> | RMSEA <sup>6</sup> | AIC <sup>7</sup> | PNFI <sup>8</sup> |
|------------------|-------------------------------|-----------------|-----------------------------------|------------------|------------------|--------------------|------------------|-------------------|
| One-factor model | 56.04                         | 27              | 2.08                              | .945             | .927             | .097               | 92.04            | .676              |

Notes: One-factor model (including a split data set of n=115): includes items 1 to 9.

<sup>1</sup> discrepancy chi-squared statistic, <sup>2</sup> degrees of freedom, <sup>3</sup> normed chi-squared statistic, <sup>4</sup> comparative fit indexes, <sup>5</sup> Tucker-Lewis Index, <sup>6</sup> root mean square error of approximation, <sup>7</sup> Akaike Information Criterion, <sup>8</sup> Parsimonious Normed Fit Index (PNFI). \*  $p = .000$

### 24 Corrected item-total correlations and Cronbach's $\alpha$ of the 9-item ORIC version

25 Table D shows the corrected item-total correlation. Corrected item-total correlation ranged from .665  
26 (item 9) to .744 (item 3).

28 Table D: Discrimination of the nine items of the German ORIC.

|        | Item discrimination <sup>29</sup><br>(corrected item-total<br>correlation) |
|--------|----------------------------------------------------------------------------|
| Item 1 | .747                                                                       |
| Item 2 | .696                                                                       |
| Item 3 | .777                                                                       |
| Item 4 | .760                                                                       |
| Item 5 | .762                                                                       |
| Item 6 | .759                                                                       |
| Item 7 | .720                                                                       |
| Item 8 | .691                                                                       |
| Item 9 | .638                                                                       |

Notes: Items could be answered on a 5-step Likert scale rating from 0 „disagree“ to 4 „agree“.

32 Cronbach's  $\alpha$  with  $\alpha = .924$  showed the measure to reach excellent reliability.
