# Supplementary material for: Translation and psychometric evaluation of the German version of the Organisational Readiness for Implementing Change measure (ORIC): a cross-sectional study
Source: PubMed Central journal article supplement — BMJ Open. 2020 Jun 7;10(6):e034380. doi: 10.1136/bmjopen-2019-034380 (PMC7282337; doi:10.1136/bmjopen-2019-034380), 2020-06-07
Supplement: bmjopen-2019-034380supp002.pdf [file bmjopen-2019-034380supp002.pdf]

1 **Supplementary File 2: Additional tables for psychometric evaluation of 10-item ORIC version**

2

3 Table A: Demographic data of participants of cognitive interviews (n=11).

|                                   |                  | Frequencies<br>for n=11 |
|-----------------------------------|------------------|-------------------------|
| Age                               | < 30 years       | 1                       |
|                                   | 31-40 years      | 3                       |
|                                   | 41-50 years      | 3                       |
|                                   | > 50 years       | 4                       |
| Gender                            | Female           | 9                       |
|                                   | Male             | 2                       |
| Profession*                       | Nurse            | 8                       |
|                                   | Physician        | 2                       |
|                                   | Psychooncologist | 3                       |
| Work experience in<br>health care | > 5 years        | 3                       |
|                                   | 5-10 years       | 4                       |
|                                   | 11-20 years      | 3                       |
|                                   | > 20 years       | 1                       |

4 \* multiple answers possible

5

6 Table B: Factor loadings on the first component.

|         | Component 1 |
|---------|-------------|
| Item 1  | 0.790       |
| Item 2  | 0.788       |
| Item 3  | 0.833       |
| Item 4  | 0.846       |
| Item 5  | 0.831       |
| Item 6  | 0.851       |
| Item 7  | 0.839       |
| Item 8  | 0.800       |
| Item 9  | 0.754       |
| Item 10 | 0.860       |

7 For EFA, the sample was split and n=115.

8

9 Table C: Inter-item correlation matrix for the German ORIC.

|         | Item 1 | Item 2 | Item 3 | Item 4 | Item 5 | Item 6 | Item 7 | Item 8 | Item 9 | Item 10 |
|---------|--------|--------|--------|--------|--------|--------|--------|--------|--------|---------|
| Item 1  | 1.000  | .634   | .650   | .611   | .652   | .587   | .558   | .538   | .507   | .542    |
| Item 2  | .634   | 1.000  | .586   | .681   | .607   | .518   | .504   | .485   | .434   | .478    |
| Item 3  | .650   | .586   | 1.000  | .673   | .723   | .636   | .600   | .558   | .492   | .560    |
| Item 4  | .611   | .681   | .673   | 1.000  | .675   | .588   | .531   | .541   | .512   | .551    |
| Item 5  | .652   | .607   | .723   | .675   | 1.000  | .622   | .621   | .466   | .474   | .578    |
| Item 6  | .587   | .518   | .636   | .588   | .622   | 1.000  | .677   | .590   | .588   | .573    |
| Item 7  | .558   | .504   | .600   | .531   | .621   | .677   | 1.000  | .612   | .491   | .567    |
| Item 8  | .538   | .485   | .558   | .541   | .466   | .590   | .612   | 1.000  | .611   | .560    |
| Item 9  | .507   | .434   | .492   | .512   | .474   | .588   | .491   | .611   | 1.000  | .659    |
| Item 10 | .542   | .478   | .560   | .551   | .578   | .573   | .567   | .560   | .659   | 1.000   |

10
