# Supplementary material for: Translation and psychometric evaluation of the German version of the Organisational Readiness for Implementing Change measure (ORIC): a cross-sectional study
Source: PubMed Central journal article supplement — BMJ Open. 2020 Jun 7;10(6):e034380. doi: 10.1136/bmjopen-2019-034380 (PMC7282337; doi:10.1136/bmjopen-2019-034380), 2020-06-07
Supplement: bmjopen-2019-034380supp005.pdf [file bmjopen-2019-034380supp005.pdf]

1 **Supplementary File 5: Results of psychometric evaluation of the 9-item German ORIC version:**

2 **Factor analysis, corrected item-total correlations, Cronbach's  $\alpha$**

3

4 **Factor analysis**

5 To get information about the factorial structure of the 9-item German ORIC, an exploratory factor  
6 analysis was conducted. KMO measure was .926 and Barlett's test of sphericity was significant ( $X^2 =$   
7 1302.78,  $p < .001$ ), indicating that a factor analysis of the data was appropriate to observe data. Table  
8 A shows results of the exploratory factor analysis. Since the main component explains 66% of the  
9 variance, a one-factor model could be assumed. The factor loading for the first component can be  
10 observed in table B.

11

12 Table A: Results of exploratory factor analysis of the 9-item German ORIC with oblique rotation and  
13 parallel analysis: eigenvalues of the ten components of the German ORIC and eigenvalues for  
14 corresponding random data.

|             | Eigenvalue |               |              | Eigenvalues for random data |                |
|-------------|------------|---------------|--------------|-----------------------------|----------------|
|             | Total      | % of variance | Cumulative % | Means                       | 95% percentile |
| Component 1 | 6.02       | 66.85         | 66.85        | 1.45                        | 1.59           |
| Component 2 | 0.802      | 8.91          | 75.76        | 1.29                        | 1.39           |
| Component 3 | 0.472      | 5.25          | 81.01        | 1.17                        | 1.25           |
| Component 4 | 0.392      | 4.35          | 85.37        | 1.07                        | 1.14           |
| Component 5 | 0.366      | 4.06          | 89.43        | 0.98                        | 1.05           |
| Component 6 | 0.304      | 3.38          | 92.81        | 0.89                        | 0.96           |
| Component 7 | 0.250      | 2.78          | 95.59        | 0.81                        | 0.87           |
| Component 8 | 0.232      | 2.57          | 98.16        | 0.71                        | 0.79           |
| Component 9 | 0.165      | 1.84          | 100.00       | 0.61                        | 0.69           |

Notes: For EFA, half of the data set (n=115) was used.

15

16

17 Table B: Factor loadings on the first component.

|        | Component 1 |
|--------|-------------|
| Item 1 | 0.860       |
| Item 2 | 0.856       |
| Item 3 | 0.837       |
| Item 4 | 0.836       |
| Item 5 | 0.835       |
| Item 6 | 0.799       |
| Item 7 | 0.797       |
| Item 8 | 0.791       |
| Item 9 | 0.739       |

Notes: For EFA, the sample was split and n=115.

18

19 A confirmatory factor analysis was performed with the one-factor model to analyze its fit indices. Indices  
20 of the one-factor model are presented in table C.

21

22 Table C: Fit indices of the one-factor model of the 9-item German ORIC.

|                  | Chi <sup>2</sup> <sup>1</sup> | df <sup>2</sup> | Chi <sup>2</sup> /df <sup>3</sup> | CFI <sup>4</sup> | TLI <sup>5</sup> | RMSEA <sup>6</sup> | AIC <sup>7</sup> | PNFI <sup>8</sup> |
|------------------|-------------------------------|-----------------|-----------------------------------|------------------|------------------|--------------------|------------------|-------------------|
| One-factor model | 56.04                         | 27              | 2.08                              | .945             | .927             | .097               | 92.04            | .676              |

Notes: One-factor model (including a split data set of n=115): includes items 1 to 9.

<sup>1</sup> discrepancy chi-squared statistic, <sup>2</sup> degrees of freedom, <sup>3</sup> normed chi-squared statistic, <sup>4</sup> comparative fit indexes, <sup>5</sup> Tucker-Lewis Index, <sup>6</sup> root mean square error of approximation, <sup>7</sup> Akaike Information Criterion, <sup>8</sup> Parsimonious Normed Fit Index (PNFI). \*  $p = .000$

23

#### 24 **Corrected item-total correlations and Cronbach's $\alpha$ of the 9-item ORIC version**

25 Table D shows the corrected item-total correlation. Corrected item-total correlation ranged from .665  
26 (item 9) to .744 (item 3).

27

28 Table D: Discrimination of the nine items of the German ORIC.

|        | Item discrimination <sup>29</sup><br>(corrected item-total<br>correlation) |
|--------|----------------------------------------------------------------------------|
| Item 1 | .747                                                                       |
| Item 2 | .696                                                                       |
| Item 3 | .777                                                                       |
| Item 4 | .760                                                                       |
| Item 5 | .762                                                                       |
| Item 6 | .759                                                                       |
| Item 7 | .720                                                                       |
| Item 8 | .691                                                                       |
| Item 9 | .638                                                                       |

Notes: Items could be answered on a 5-step Likert scale rating from 0 „disagree“ to 4 „agree“.

30

31

32 Cronbach's  $\alpha$  with  $\alpha = .924$  showed the measure to reach excellent reliability.
