# Supplementary figures and images for: Translation and psychometric evaluation of the German version of the Organisational Readiness for Implementing Change measure (ORIC): a cross-sectional study
Source: PubMed Central journal article supplement — BMJ Open. 2020 Jun 7;10(6):e034380. doi: 10.1136/bmjopen-2019-034380 (PMC7282337; doi:10.1136/bmjopen-2019-034380), 2020-06-07

## Supplementary File 4: Confirmatory factor analysis model of the 10-item German ORIC

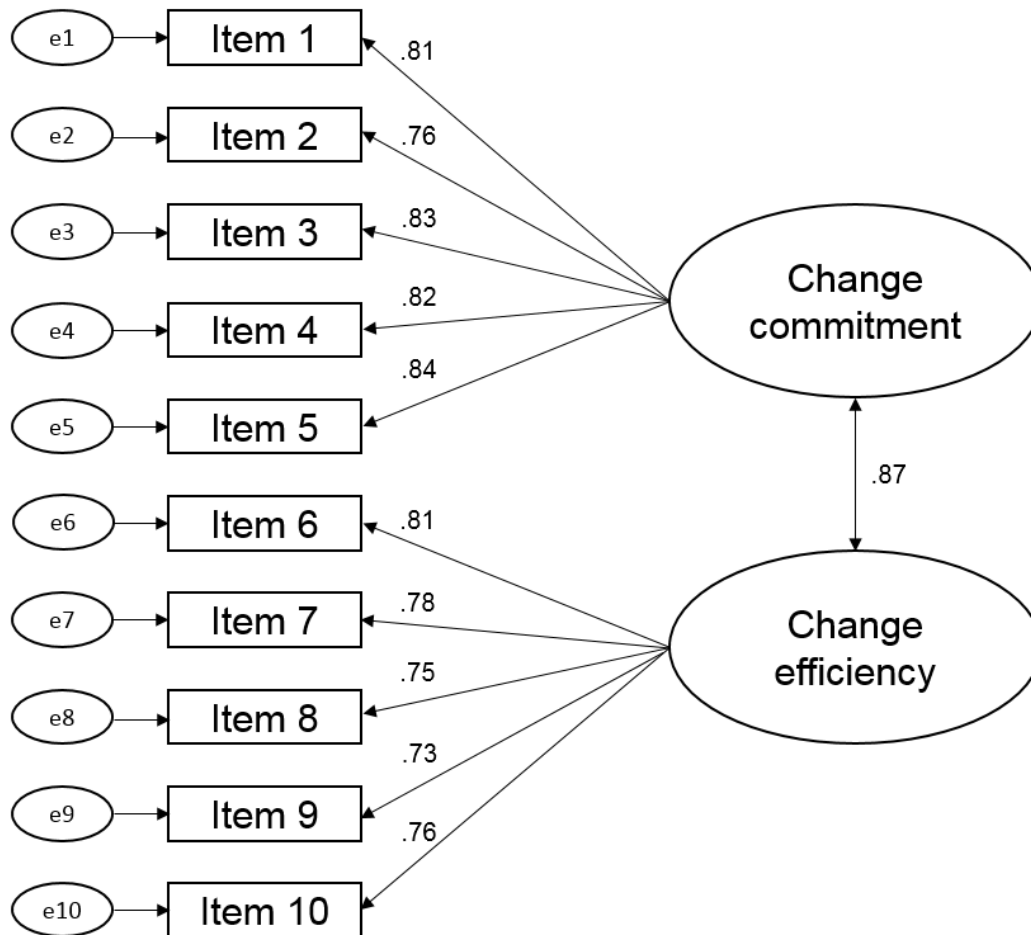

Supplement: bmjopen-2019-034380supp004.pdf [file bmjopen-2019-034380supp004.pdf]
